# Supplementary material for: Genomic Diversity, Antimicrobial Resistance, Plasmidome, and Virulence Profiles of Salmonella Isolated from Small Specialty Crop Farms Revealed by Whole-Genome Sequencing
Source: MDPI journal article supplement (doi:10.3390/antibiotics12111637), 2023-11-18
Supplement: s1 [file s1]

# Supplementary file

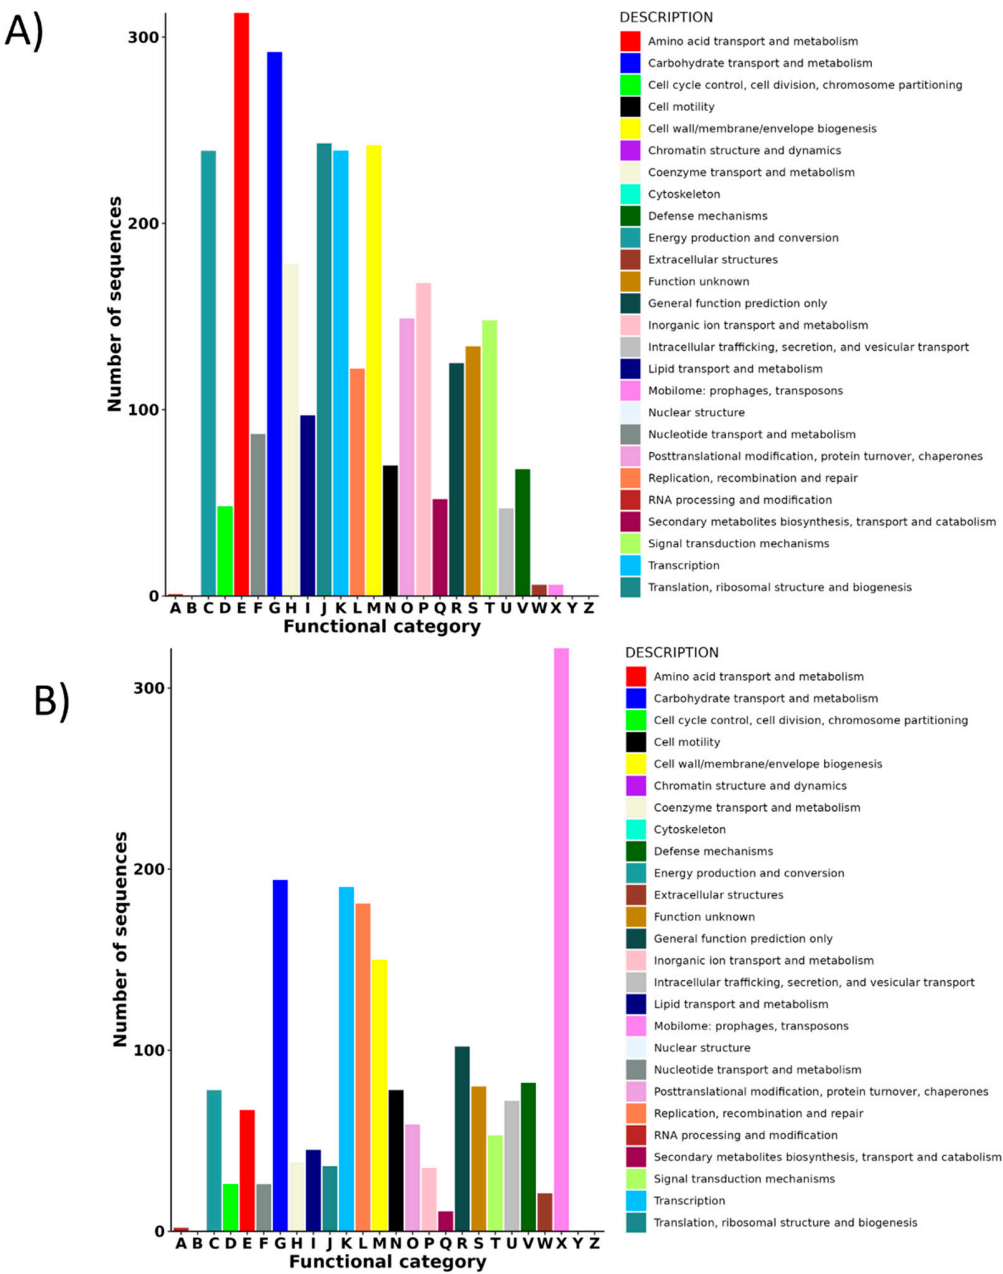

**Figure S1.** Functional annotation of the core(A) and the accessory(B) genes using the cluster of orthologous genes (COG).

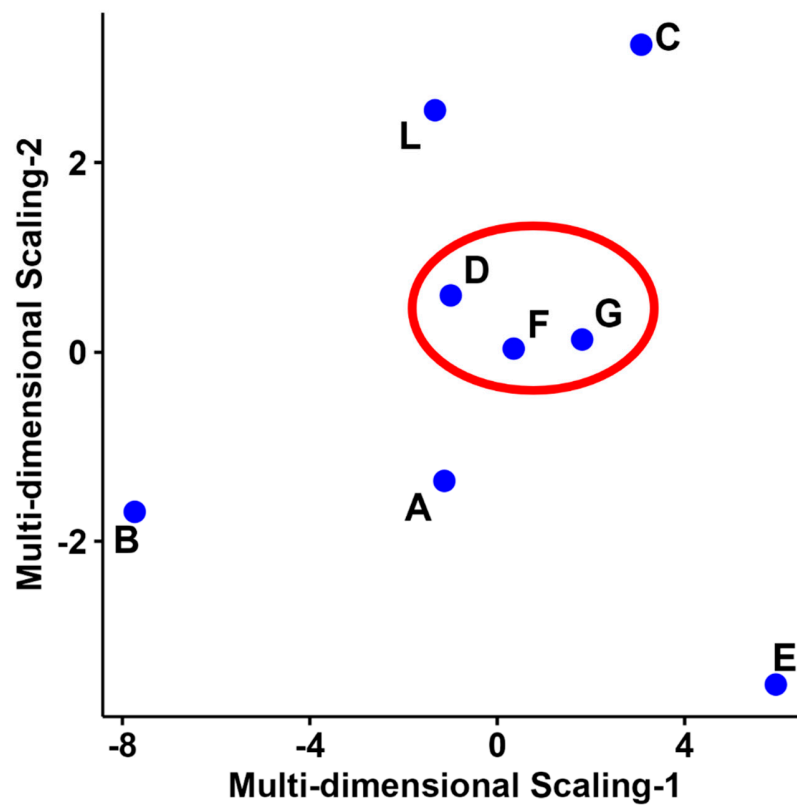

**Figure S2.** Multi-dimensional scaling (MDS) plot constructed using the geographical location of the farms (8) in R. The distance matrix was computed using each farm's latitude and longitude coordinates. Out of 8 farms, 3 Farms (D, F, and G) were located closer to each other.
