# Supplementary material for: Genomic Diversity, Antimicrobial Resistance, Plasmidome, and Virulence Profiles of Salmonella Isolated from Small Specialty Crop Farms Revealed by Whole-Genome Sequencing
Source: MDPI journal article supplement (doi:10.3390/antibiotics12111637), 2023-11-18
Supplement: s1 [file s1]

**Table S1.** The total number of samples and frequency of samples collected from each farm.

| <b>Farm</b> | <b>Total Samples Collected</b> | <b>Soil</b>                | <b>Manure</b>             | <b>Water</b>              |
|-------------|--------------------------------|----------------------------|---------------------------|---------------------------|
| A           | 94                             | 55 (once a month)          | 39 (once a month)         | not collected             |
| B           | 89                             | 27 (once a month)          | 58 (once - twice a month) | 4 (once a month)          |
| C           | 159                            | 77 (twice a month)         | 64 (twice a month)        | 18 (once a month)         |
| D           | 102                            | 39 (once a month)          | 63 (once - twice a month) | not collected             |
| E           | 26                             | 26 (once a month)          | not collected             | not collected             |
| F           | 118                            | 45 (once a month)          | 37 (once a month)         | 36 (once a month)         |
| G           | 144                            | 61 (once - thrice a month) | 47 (once - twice a month) | 39 (once - twice a month) |
| H           | 102                            | 50 (once - twice a month)  | 38 (once - twice a month) | 15 (once a month)         |
| I           | 74                             | 67 (once - twice a month)  |                           | 7 (once a month)          |
| J           | 145                            | 62 (once - thrice a month) | 47 (twice a month)        | 36 (once - twice a month) |
| K           | 55                             | 63 (once - twice a month)  | 20 (once every 2 months)  | 16 (once - twice a month) |
| L           | 136                            | 62 (once - twice a month)  | 37(once - twice a month)  | 24 (once - twice a month) |
| O           | 7                              | not collected              | 7 (once a month)          | not collected             |
| P           | 1                              | 1 (1 time)                 | not collected             | not collected             |
| Total       | 1252                           |                            |                           |                           |

Dairy manure, poultry manure and soil samples were collected from 2016-2021, whereas water was collected from 2019-2021. The frequency of samples collected from each farm is provided in the parentheses.
