# Supplementary material for: Genomic Diversity, Antimicrobial Resistance, Plasmidome, and Virulence Profiles of Salmonella Isolated from Small Specialty Crop Farms Revealed by Whole-Genome Sequencing
Source: Antibiotics (Basel). 2023 Nov 18;12(11):1637. doi: 10.3390/antibiotics12111637 (PMC10668983; doi:10.3390/antibiotics12111637)
Supplement: Supplementary file 1 [file antibiotics-12-01637-s001.zip]

Archive with 6 entries (6 files):
- supplementary Table S1.number of samples-collected from each farm 11 10 2023.pdf
- supplementary Table S2.summary of analysis.xlsx
- supplementary Table S3.scoary_results.xlsx
- Supplementary_file_figures.pdf
- supplemntary Table S4.plasmids.xlsx
- supplemntary Table S5.virulence genes.xlsx
