# Supplementary material for: Genomic Diversity, Antimicrobial Resistance, Plasmidome, and Virulence Profiles of Salmonella Isolated from Small Specialty Crop Farms Revealed by Whole-Genome Sequencing
Source: Antibiotics (Basel). 2023 Nov 18;12(11):1637. doi: 10.3390/antibiotics12111637 (PMC10668983; doi:10.3390/antibiotics12111637)
Supplement: Supplementary file 1 [file antibiotics-12-01637-s001.zip › supplementary Table S2.summary of analysis.xlsx]

## Sheet: Sheet1
The genome statistics of 78 isolates
Year	Sample number	Genomic coverage	Genome size	Number of contigs	GC(%)	Bacterial BUSCO	N50	h1	h2	o_antigen	MLST	Serogroup	cgmlst_ST	cgmlst_found_loci	cgmlst_matching_alleles	Serotype	Completeness	Contamination	Number of predicted genes	collection_source
2016	AG21-0050	87.056	4634849	31	52.28	98.65	397589	g,m,s	-	6,7,14,[54]	138	C1	1125754013	330	323	Montevideo	100	0.61	4389	dairy cattle manure
2017	AG21-0051	55.916	4968396	37	52.09	98.65	406024	g,p	-	1,9,12[Vi]	10	D1		329	323	Dublin	99.71	0.29	4824	dairy cattle manure
2017	AG21-0052	82.401	4610540	29	52.27	98.65	369141	b	1,2	1,4,[5],12	3927	B	233184900	330	318	Paratyphi	100	0.51	4309	poultry manure
2017	AG21-0053	63.475	4631614	24	52.16	98.65	551390	e,h	1,6	3,{10}{15}{15,34}	64	E1	3502555565	330	325	Anatum	100	0.04	4342	poultry manure
2017	AG21-0054	70.304	4630381	23	52.16	98.65	573195	e,h	1,6	3,{10}{15}{15,34}	64	E1	333640835	330	326	Anatum	100	0.04	4333	poultry manure
2017	AG21-0055	76.342	4425736	52	52.23	98.65	252267	l,v	1,2	6,8	214	C2-C3	4173818838	330	316	Litchfield	100	0.04	4391	soil
2018	AG21-0056	72.381	4691686	68	52.14	98.65	161003	z4,z23	-	6,14,18	367	K		329	322	Cerro	99.96	0.33	4462	dairy cattle manure
2018	AG21-0057	67.083	4619216	28	52.26	98.65	445632	g,m,s	-	6,7,14,[54]	4	C1	261136281	330	326	Montevideo	100	0.04	4330	poultry manure
2018	AG21-0058	52.415	4619151	38	52.26	98.65	387138	g,m,s	-	6,7,14,[54]	4	C1		329	324	Montevideo	100	0.1	4351	poultry manure
2018	AG21-0059	56.361	4619903	32	52.26	98.65	493941	g,m,s	-	6,7,14,[54]	4	C1	3885435554	330	325	Montevideo	100	0.06	4340	poultry manure
2019	AG21-0060	67.184	4699061	33	52.14	98.65	479332	g,m	-	1,9,12	11	D1	1587198708	330	321	Enteritidis	100	0.04	4437	poultry manure
2019	AG21-0061	111.321	4705991	25	52.24	98.65	497622	e,h	e,n,z15	6,7,14	22	C1	743259785	330	322	Braenderup	100	0.04	4412	poultry manure
2019	AG21-0062	60.89	4706796	27	52.24	98.65	497106	e,h	e,n,z15	6,7,14	22	C1	261255119	330	321	Braenderup	100	0.04	4409	poultry manure
2019	AG21-0063	59.568	4705238	27	52.24	98.65	497106	e,h	e,n,z15	6,7,14	22	C1	743259785	330	322	Braenderup	100	0.04	4424	poultry manure
2019	AG21-0064	72.645	4706022	27	52.24	98.65	496661	e,h	e,n,z15	6,7,14	22	C1	743259785	330	322	Braenderup	100	0.04	4411	poultry manure
2019	AG21-0065	75.381	4706229	28	52.24	98.65	497106	e,h	e,n,z15	6,7,14	22	C1	743259785	330	322	Braenderup	100	0.18	4437	poultry manure
2019	AG21-0066	62.551	4699236	32	52.14	98.65	401362	g,m	-	1,9,12	11	D1	1587198708	330	321	Enteritidis	100	0.33	4451	poultry manure
2019	AG21-0559	94.136	4667186	54	52.22	98.65	218930	z4,z23	-	6,14,18	367	K	3190246521	330	321	Cerro	100	0.04	4425	stream water
2019	AG21-0560	72.828	4668221	54	52.22	98.65	201244	z4,z23	-	6,14,18	367	K	1490794587	330	322	Cerro	100	0.04	4425	stream water
2019	AG21-0561	81.581	4668001	56	52.22	98.65	201244	z4,z23	-	6,14,18	367	K	1490794587	330	322	Cerro	100	0.04	4435	stream water
2019	AG21-0562	86.547	4666966	55	52.22	98.65	201244	z4,z23	-	6,14,18	367	K	3190246521	330	321	Cerro	100	0.04	4429	stream water
2019	AG21-0563	89.78	4666571	52	52.22	98.65	197264	z4,z23	-	6,14,18	367	K	3190246521	330	321	Cerro	100	0.04	4430	stream water
2019	AG21-0564	71.325	4576725	26	52.24	98.65	477960	l,v	1,7	3,{10}{15}{15,34}	654	E1	3401657964	330	328	Give	100	0.04	4360	Water filter
2019	AG21-0565	64.108	4448654	38	52.24	98.65	393739	l,v	1,7	3,{10}{15}{15,34}	654	E1	3401657964	330	328	Give	100	0.04	4387	Water filter
2019	AG21-0566	62.975	4576448	29	52.24	98.65	423872	l,v	1,7	3,{10}{15}{15,34}	654	E1	173926507	330	327	Give	100	0.04	4362	Water filter
2019	AG21-0567	102.261	4550513	27	52.24	98.65	477960	l,v	1,7	3,{10}{15}{15,34}	654	E1	3401657964	330	328	Give	100	0.04	4362	Water filter
2019	AG21-0568	96.685	4577681	25	52.24	98.65	477960	l,v	1,7	3,{10}{15}{15,34}	654	E1	3401657964	330	328	Give	100	0.04	4357	Water filter
2019	AG21-0569	64.593	4577528	24	52.06	98.65	720665	m,t	-	6,7,14	23	C1	2890440478	330	329	Oranienburg	100	0.04	4266	Water filter
2019	AG21-0570	58.678	4575752	28	52.08	98.65	672648	m,t	-	6,7,14	23	C1	2890440478	330	329	Oranienburg	100	0.04	4282	Water filter
2019	AG21-0571	50.908	4576855	28	52.07	98.65	720668	m,t	-	6,7,14	23	C1	2890440478	330	329	Oranienburg	100	0.04	4272	Water filter
2019	AG21-0572	75.078	4598569	30	52.2	98.65	477960	l,v	1,7	3,{10}{15}{15,34}	654	E1	2944359842	330	327	Give	100	0.04	4442	Water filter
2019	AG21-0573	57.35	4576942	28	52.07	98.65	696225	m,t	-	6,7,14	23	C1	2890440478	330	329	Oranienburg	100	0.04	4277	Water filter
2020	AG21-0574	97.443	4650577	58	52.24	98.65	176170	z4,z23	-	6,14,18	367	K	1178949176	330	322	Cerro	99.71	0.04	4424	Dairy manure
2020	AG21-0575	80.781	4649881	55	52.24	98.65	178472	z4,z23	-	6,14,18	367	K	1178949176	330	322	Cerro	99.71	0.04	4418	Dairy manure
2020	AG21-0576	80.984	4649099	55	52.23	98.65	178472	z4,z23	-	6,14,18	367	K	1178949176	330	322	Cerro	99.71	0.04	4422	Dairy manure
2020	AG21-0577	91.43	4668788	64	52.22	98.65	174377	z4,z23	-	6,14,18	9243	K	1636626610	330	320	Cerro	100	0.04	4434	Dairy manure
2020	AG21-0578	81.346	4668497	62	52.22	98.65	174377	z4,z23	-	6,14,18	9243	K	3994856764	330	320	Cerro	100	0.04	4433	Dairy manure
2020	AG21-0579	80.699	4668430	63	52.22	98.65	174190	z4,z23	-	6,14,18	9243	K	1636626610	330	320	Cerro	100	0.04	4436	Dairy manure
2020	AG21-0580	85.77	4633057	54	52.24	98.65	178472	z4,z23	-	6,14,18	367	K	1178949176	330	322	Cerro	99.71	0.11	4404	Dairy manure
2020	AG21-0581	73.135	4633120	54	52.24	98.65	176134	z4,z23	-	6,14,18	367	K	1178949176	330	322	Cerro	99.71	0.04	4399	Dairy manure
2020	AG21-0582	74.867	4632929	57	52.24	98.65	176170	z4,z23	-	6,14,18	367	K	1178949176	330	322	Cerro	99.71	0.04	4398	Dairy manure
2020	AG21-0583	79.236	4865997	39	52.08	98.65	367549	e,h	1,2	6,8,20	350	C2-C3	2314616094	330	321	Newport	100	0.07	4653	water filter
2020	AG21-0584	71.023	4924757	34	52.17	98.65	729051	e,h	1,2	6,8,20	45	C2-C3	605643227	330	323	Newport	100	0.33	4731	water filter
2020	AG21-0585	83.893	4866695	36	52.08	98.65	367549	e,h	1,2	6,8,20	350	C2-C3	2314616094	330	321	Newport	100	0.07	4647	water filter
2020	AG21-0586	71.178	4924987	32	52.17	98.65	748562	e,h	1,2	6,8,20	45	C2-C3	638440092	330	324	Newport	100	0.18	4726	water filter
2020	AG21-0587	72.974	4925241	33	52.17	98.65	748562	e,h	1,2	6,8,20	45	C2-C3	339335770	330	325	Newport	100	0.18	4722	water filter
2020	AG21-0588	63.721	4865851	41	52.08	98.65	367549	e,h	1,2	6,8,20	350	C2-C3	2314616094	330	321	Newport	100	0.07	4657	water filter
2020	AG21-0589	78.665	4664552	30	52.17	98.65	521499	d	1,2	6,8	83	C2-C3	477848871	330	321	Muenchen	100	0.04	4345	water filter
2020	AG21-0590	73.155	4663936	28	52.17	98.65	521499	d	1,2	6,8	83	C2-C3	2577670862	330	321	Muenchen	100	0.04	4344	water filter
2020	AG21-0591	82.771	4664118	29	52.17	98.65	521499	d	1,2	6,8	83	C2-C3	3324031819	330	322	Muenchen	100	0.04	4345	water filter
2018	AG21-0592	93.492	4619286	30	52.26	98.65	445632	g,m,s	-	6,7,14,[54]	4	C1	261136281	330	326	Montevideo	100	0.04	4330	Poultry manure
2021	AG21-0001	69.13	4657383	67	52.23	98.65	174190	z4,z23	-	6,14,18	367	K	860398744	330	324	Cerro	100	0.04	4428	Water
2021	AG21-0002	90.32	4752868	40	52.22	98.65	317915	[f],g,[t]	-	1,9,12	435	D1	351822731	330	318	Berta	100	0.04	4465	Water
2021	AG21-0003	58.64	4657814	74	52.23	98.65	142458	z4,z23	-	6,14,18	367	K	2870940496	330	323	Cerro	100	0.04	4430	Water
2021	AG21-0004	58.49	4841681	48	52.1	98.65	266662	e,h	1,2	6,8,20	350	C2-C3	8049148	330	323	Newport	100	0.07	4634	Water
2021	AG21-0005	48.52	4752516	41	52.22	98.65	261913	[f],g,[t]	-	1,9,12	435	D1	351822731	330	318	Berta	100	0.04	4465	Water
2021	AG21-0006	51.18	4775616	93	52.16	98.65	152057	y	e,n,x	6,7	405	C1	3446483898	330	324	Hartford	99.41	0.06	4540	Water
2021	AG21-0007	62.48	4787169	61	52.11	98.65	191723	y	e,n,x	6,7	405	C1	3446483898	330	324	Hartford	99.41	0.06	4533	Water
2021	AG21-0008	64.82	4651552	71	52.27	98.65	142458	z4,z23	-	6,14,18	367	K	2753964199	330	320	Cerro	100	0.04	4432	Water
2021	AG21-0010	51.53	4660951	80	52.22	98.65	141661	z4,z23	-	6,14,18	367	K		327	321	Cerro	100	0.21	4509	Water
2021	AG21-0011	35.38	4577503	42	52.18	98.65	382607	g,m	-	1,13,23	2606	G	1388843624	330	324	Agbeni	100	0.33	4292	Water
2021	AG21-0012	30.23	4924186	30	52.17	98.65	750055	e,h	1,2	6,8,20	45	C2-C3	339335770	330	325	Newport	100	0.18	4723	Water
2021	AG21-0014	33.33	4925736	32	52.17	98.65	728925	e,h	1,2	6,8,20	45	C2-C3	339335770	330	325	Newport	100	0.18	4722	Water
2021	AG21-0015	38.43	4666805	55	52.21	98.65	176171	z4,z23	-	6,14,18	367	K	1033096633	330	322	Cerro	99.8	0.04	4438	Water
2021	AG21-0016	15.88	4663897	68	52.21	98.65	133828	z4,z23	-	6,14,18	367	K	1624429625	330	320	Cerro	99.8	0.06	4441	Water
2021	AG21-0017	17.716	4664254	63	52.21	98.65	161733	z4,z23	-	6,14,18	367	K	3024901912	330	321	Cerro	99.8	0.04	4438	Water
2021	AG21-0018	33.3	4657745	62	52.22	98.65	176170	z4,z23	-	6,14,18	367	K	613371614	330	323	Cerro	100	0.04	4430	Water
2021	AG21-0019	64.96	4650792	58	52.1	98.65	162464	m,t	-	6,7,14	23	C1	4066065401	330	328	Oranienburg	100	0.04	4415	Water
2021	AG21-0020	64.36	4653436	21	52.07	98.65	696367	m,t	-	6,7,14	23	C1	4066065401	330	328	Oranienburg	100	0.04	4386	Water
2021	AG21-0021	48.2	4652556	33	52.08	98.65	377522	m,t	-	6,7,14	23	C1	4066065401	330	328	Oranienburg	100	0.04	4388	Water
2021	AG21-0022	39.72	4660633	26	52.05	98.65	696262	m,t	-	6,7,14	23	C1	4066065401	330	328	Oranienburg	100	0.04	4402	Water
2021	AG21-0023	43.144	4652666	40	52.07	98.65	402922	m,t	-	6,7,14	23	C1	4066065401	330	328	Oranienburg	100	0.04	4393	Water
2021	AG21-0024	28.51	4846308	58	52.13	98.65	261517	y	e,n,x	6,7	405	C1	678437997	330	322	Hartford	99.41	0.04	4612	Water
2021	AG21-0025	32.76	4845418	58	52.13	98.65	261518	y	e,n,x	6,7	405	C1	678437997	330	322	Hartford	99.41	0.04	4622	Water
2021	AG21-0026	30.45	4846371	43	52.13	98.65	265656	y	e,n,x	6,7	405	C1	678437997	330	322	Hartford	99.41	0.04	4604	Water
2021	AG21-0027	24.875	4846013	51	52.13	98.65	260409	y	e,n,x	6,7	405	C1	678437997	330	322	Hartford	99.41	0.04	4615	Water
2021	AG21-0028	27.55	4845484	59	52.13	98.65	259783	y	e,n,x	6,7	405	C1	678437997	330	322	Hartford	99.41	0.09	4618	Water
2021	AG21-0029	40.58	4573720	44	52.09	98.65	276170	m,t	-	6,7,14	23	C1	2890440478	330	329	Oranienburg	100	0.04	4264	Water
