# Supplementary material for: Genomic Diversity, Antimicrobial Resistance, Plasmidome, and Virulence Profiles of Salmonella Isolated from Small Specialty Crop Farms Revealed by Whole-Genome Sequencing
Source: Antibiotics (Basel). 2023 Nov 18;12(11):1637. doi: 10.3390/antibiotics12111637 (PMC10668983; doi:10.3390/antibiotics12111637)
Supplement: Supplementary file 1 [file antibiotics-12-01637-s001.zip › supplementary Table S3.scoary_results.xlsx]

## Sheet: signifcantly_asscoaited_genes
The significantly associated genes with each serovars by Scoary
Serotype	Gene	Non-unique Gene name	Annotation	Number_pos_present_in	Number_neg_present_in	Number_pos_not_present_in	Number_neg_not_present_in	Sensitivity	Specificity	Odds_ratio	Naive_p	Bonferroni_p	Benjamini_H_p	Max_Pairwise_comparisons	Max_supporting_pairs	Max_opposing_pairs	Best_pairwise_comp_p	Worst_pairwise_comp_p
Anatum	group_111		hypothetical protein	2	0	0	76	100	100	inf	0.000333	1	0.0147115	1	1	0	1	1
Anatum	group_3384		hypothetical protein	2	0	0	76	100	100	inf	0.000333	1	0.0147115	1	1	0	1	1
Anatum	group_3385		hypothetical protein	2	0	0	76	100	100	inf	0.000333	1	0.0147115	1	1	0	1	1
Anatum	group_3386	symE_1	Endoribonuclease SymE	2	0	0	76	100	100	inf	0.000333	1	0.0147115	1	1	0	1	1
Anatum	group_3387		hypothetical protein	2	0	0	76	100	100	inf	0.000333	1	0.0147115	1	1	0	1	1
Anatum	group_3388		IS3 family transposase ISSty2	2	0	0	76	100	100	inf	0.000333	1	0.0147115	1	1	0	1	1
Anatum	group_3389		hypothetical protein	2	0	0	76	100	100	inf	0.000333	1	0.0147115	1	1	0	1	1
Anatum	group_3390		hypothetical protein	2	0	0	76	100	100	inf	0.000333	1	0.0147115	1	1	0	1	1
Anatum	group_3391		hypothetical protein	2	0	0	76	100	100	inf	0.000333	1	0.0147115	1	1	0	1	1
Anatum	group_3392		hypothetical protein	2	0	0	76	100	100	inf	0.000333	1	0.0147115	1	1	0	1	1
Anatum	group_3393		hypothetical protein	2	0	0	76	100	100	inf	0.000333	1	0.0147115	1	1	0	1	1
Anatum	group_3394		hypothetical protein	2	0	0	76	100	100	inf	0.000333	1	0.0147115	1	1	0	1	1
Anatum	lexA_1		LexA repressor	2	0	0	76	100	100	inf	0.000333	1	0.0147115	1	1	0	1	1
Anatum	group_3397		hypothetical protein	2	0	0	76	100	100	inf	0.000333	1	0.0147115	1	1	0	1	1
Anatum	group_3399		hypothetical protein	2	0	0	76	100	100	inf	0.000333	1	0.0147115	1	1	0	1	1
Anatum	group_3400		hypothetical protein	2	0	0	76	100	100	inf	0.000333	1	0.0147115	1	1	0	1	1
Anatum	group_3401		hypothetical protein	2	0	0	76	100	100	inf	0.000333	1	0.0147115	1	1	0	1	1
Anatum	group_3402		hypothetical protein	2	0	0	76	100	100	inf	0.000333	1	0.0147115	1	1	0	1	1
Anatum	group_3403		hypothetical protein	2	0	0	76	100	100	inf	0.000333	1	0.0147115	1	1	0	1	1
Anatum	group_3404		hypothetical protein	2	0	0	76	100	100	inf	0.000333	1	0.0147115	1	1	0	1	1
Anatum	group_3405	ybcO	Putative nuclease YbcO	2	0	0	76	100	100	inf	0.000333	1	0.0147115	1	1	0	1	1
Anatum	group_3406	rusA	Crossover junction endodeoxyribonuclease RusA	2	0	0	76	100	100	inf	0.000333	1	0.0147115	1	1	0	1	1
Anatum	group_3407		hypothetical protein	2	0	0	76	100	100	inf	0.000333	1	0.0147115	1	1	0	1	1
Anatum	group_3410		hypothetical protein	2	0	0	76	100	100	inf	0.000333	1	0.0147115	1	1	0	1	1
Anatum	group_3411		hypothetical protein	2	0	0	76	100	100	inf	0.000333	1	0.0147115	1	1	0	1	1
Anatum	group_3412		hypothetical protein	2	0	0	76	100	100	inf	0.000333	1	0.0147115	1	1	0	1	1
Anatum	group_3414		hypothetical protein	2	0	0	76	100	100	inf	0.000333	1	0.0147115	1	1	0	1	1
Anatum	group_3415		hypothetical protein	2	0	0	76	100	100	inf	0.000333	1	0.0147115	1	1	0	1	1
Anatum	group_3416		hypothetical protein	2	0	0	76	100	100	inf	0.000333	1	0.0147115	1	1	0	1	1
Anatum	group_3417		hypothetical protein	2	0	0	76	100	100	inf	0.000333	1	0.0147115	1	1	0	1	1
Anatum	group_3418		hypothetical protein	2	0	0	76	100	100	inf	0.000333	1	0.0147115	1	1	0	1	1
Anatum	group_3433		hypothetical protein	2	0	0	76	100	100	inf	0.000333	1	0.0147115	1	1	0	1	1
Anatum	group_3434		hypothetical protein	2	0	0	76	100	100	inf	0.000333	1	0.0147115	1	1	0	1	1
Anatum	group_3435		hypothetical protein	2	0	0	76	100	100	inf	0.000333	1	0.0147115	1	1	0	1	1
Anatum	group_3436	intA_1	Prophage integrase IntA	2	0	0	76	100	100	inf	0.000333	1	0.0147115	1	1	0	1	1
Anatum	group_3437		hypothetical protein	2	0	0	76	100	100	inf	0.000333	1	0.0147115	1	1	0	1	1
Anatum	group_3438		hypothetical protein	2	0	0	76	100	100	inf	0.000333	1	0.0147115	1	1	0	1	1
Anatum	group_3439		hypothetical protein	2	0	0	76	100	100	inf	0.000333	1	0.0147115	1	1	0	1	1
Anatum	group_3440		hypothetical protein	2	0	0	76	100	100	inf	0.000333	1	0.0147115	1	1	0	1	1
Anatum	group_3441		hypothetical protein	2	0	0	76	100	100	inf	0.000333	1	0.0147115	1	1	0	1	1
Anatum	group_3442		hypothetical protein	2	0	0	76	100	100	inf	0.000333	1	0.0147115	1	1	0	1	1
Anatum	group_3443	hns_1	DNA-binding protein H-NS	2	0	0	76	100	100	inf	0.000333	1	0.0147115	1	1	0	1	1
Anatum	group_3444		hypothetical protein	2	0	0	76	100	100	inf	0.000333	1	0.0147115	1	1	0	1	1
Anatum	group_3445		hypothetical protein	2	0	0	76	100	100	inf	0.000333	1	0.0147115	1	1	0	1	1
Anatum	group_3446		hypothetical protein	2	0	0	76	100	100	inf	0.000333	1	0.0147115	1	1	0	1	1
Anatum	group_3447		hypothetical protein	2	0	0	76	100	100	inf	0.000333	1	0.0147115	1	1	0	1	1
Anatum	group_3448		hypothetical protein	2	0	0	76	100	100	inf	0.000333	1	0.0147115	1	1	0	1	1
Anatum	group_3449		hypothetical protein	2	0	0	76	100	100	inf	0.000333	1	0.0147115	1	1	0	1	1
Anatum	group_3450		hypothetical protein	2	0	0	76	100	100	inf	0.000333	1	0.0147115	1	1	0	1	1
Anatum	group_3451		hypothetical protein	2	0	0	76	100	100	inf	0.000333	1	0.0147115	1	1	0	1	1
Anatum	group_3452		hypothetical protein	2	0	0	76	100	100	inf	0.000333	1	0.0147115	1	1	0	1	1
Anatum	group_3453		hypothetical protein	2	0	0	76	100	100	inf	0.000333	1	0.0147115	1	1	0	1	1
Anatum	group_3455		hypothetical protein	2	0	0	76	100	100	inf	0.000333	1	0.0147115	1	1	0	1	1
Anatum	group_3457		hypothetical protein	2	0	0	76	100	100	inf	0.000333	1	0.0147115	1	1	0	1	1
Anatum	group_3460	intS_1	Prophage integrase IntS	2	0	0	76	100	100	inf	0.000333	1	0.0147115	1	1	0	1	1
Anatum	group_3461		hypothetical protein	2	0	0	76	100	100	inf	0.000333	1	0.0147115	1	1	0	1	1
Anatum	pemK		Endoribonuclease PemK	2	0	0	76	100	100	inf	0.000333	1	0.0147115	1	1	0	1	1
Anatum	pemI		Antitoxin PemI	2	0	0	76	100	100	inf	0.000333	1	0.0147115	1	1	0	1	1
Anatum	group_3464		hypothetical protein	2	0	0	76	100	100	inf	0.000333	1	0.0147115	1	1	0	1	1
Anatum	group_3465		hypothetical protein	2	0	0	76	100	100	inf	0.000333	1	0.0147115	1	1	0	1	1
Anatum	group_3466		hypothetical protein	2	0	0	76	100	100	inf	0.000333	1	0.0147115	1	1	0	1	1
Anatum	group_3467		hypothetical protein	2	0	0	76	100	100	inf	0.000333	1	0.0147115	1	1	0	1	1
Anatum	group_3474	intA_2	Prophage integrase IntA	2	0	0	76	100	100	inf	0.000333	1	0.0147115	1	1	0	1	1
Anatum	group_3475		hypothetical protein	2	0	0	76	100	100	inf	0.000333	1	0.0147115	1	1	0	1	1
Anatum	group_3477		hypothetical protein	2	0	0	76	100	100	inf	0.000333	1	0.0147115	1	1	0	1	1
Anatum	group_3479		hypothetical protein	2	0	0	76	100	100	inf	0.000333	1	0.0147115	1	1	0	1	1
Anatum	group_3480		IS630 family transposase IS630	2	0	0	76	100	100	inf	0.000333	1	0.0147115	1	1	0	1	1
Anatum	group_3481	yadN	putative fimbrial-like protein YadN	2	0	0	76	100	100	inf	0.000333	1	0.0147115	1	1	0	1	1
Anatum	yadV_3		putative fimbrial chaperone YadV	2	0	0	76	100	100	inf	0.000333	1	0.0147115	1	1	0	1	1
Anatum	group_3483	htrE	Outer membrane usher protein HtrE	2	0	0	76	100	100	inf	0.000333	1	0.0147115	1	1	0	1	1
Anatum	group_3484	yadM	putative fimbrial-like protein YadM	2	0	0	76	100	100	inf	0.000333	1	0.0147115	1	1	0	1	1
Anatum	group_3485	yadL	putative fimbrial-like protein YadL	2	0	0	76	100	100	inf	0.000333	1	0.0147115	1	1	0	1	1
Anatum	group_3486	yadK	putative fimbrial-like protein YadK	2	0	0	76	100	100	inf	0.000333	1	0.0147115	1	1	0	1	1
Anatum	group_3487	yadC	putative fimbrial-like protein YadC	2	0	0	76	100	100	inf	0.000333	1	0.0147115	1	1	0	1	1
Anatum	group_3488		hypothetical protein	2	0	0	76	100	100	inf	0.000333	1	0.0147115	1	1	0	1	1
Anatum	group_3490		hypothetical protein	2	0	0	76	100	100	inf	0.000333	1	0.0147115	1	1	0	1	1
Anatum	group_3491		hypothetical protein	2	0	0	76	100	100	inf	0.000333	1	0.0147115	1	1	0	1	1
Anatum	group_3492		hypothetical protein	2	0	0	76	100	100	inf	0.000333	1	0.0147115	1	1	0	1	1
Anatum	group_3493		hypothetical protein	2	0	0	76	100	100	inf	0.000333	1	0.0147115	1	1	0	1	1
Anatum	group_3494		hypothetical protein	2	0	0	76	100	100	inf	0.000333	1	0.0147115	1	1	0	1	1
Anatum	group_3495		hypothetical protein	2	0	0	76	100	100	inf	0.000333	1	0.0147115	1	1	0	1	1
Anatum	group_3496		hypothetical protein	2	0	0	76	100	100	inf	0.000333	1	0.0147115	1	1	0	1	1
Anatum	group_3497		hypothetical protein	2	0	0	76	100	100	inf	0.000333	1	0.0147115	1	1	0	1	1
Anatum	group_3498		hypothetical protein	2	0	0	76	100	100	inf	0.000333	1	0.0147115	1	1	0	1	1
Anatum	group_3499		hypothetical protein	2	0	0	76	100	100	inf	0.000333	1	0.0147115	1	1	0	1	1
Anatum	group_3500		hypothetical protein	2	0	0	76	100	100	inf	0.000333	1	0.0147115	1	1	0	1	1
Anatum	group_3501		hypothetical protein	2	0	0	76	100	100	inf	0.000333	1	0.0147115	1	1	0	1	1
Anatum	group_3502		hypothetical protein	2	0	0	76	100	100	inf	0.000333	1	0.0147115	1	1	0	1	1
Anatum	group_3503		hypothetical protein	2	0	0	76	100	100	inf	0.000333	1	0.0147115	1	1	0	1	1
Anatum	group_3504		hypothetical protein	2	0	0	76	100	100	inf	0.000333	1	0.0147115	1	1	0	1	1
Anatum	group_3505		hypothetical protein	2	0	0	76	100	100	inf	0.000333	1	0.0147115	1	1	0	1	1
Anatum	group_3506		hypothetical protein	2	0	0	76	100	100	inf	0.000333	1	0.0147115	1	1	0	1	1
Anatum	group_3507		hypothetical protein	2	0	0	76	100	100	inf	0.000333	1	0.0147115	1	1	0	1	1
Anatum	group_3508		hypothetical protein	2	0	0	76	100	100	inf	0.000333	1	0.0147115	1	1	0	1	1
Anatum	group_3509		hypothetical protein	2	0	0	76	100	100	inf	0.000333	1	0.0147115	1	1	0	1	1
Anatum	group_3510		hypothetical protein	2	0	0	76	100	100	inf	0.000333	1	0.0147115	1	1	0	1	1
Anatum	group_3511		hypothetical protein	2	0	0	76	100	100	inf	0.000333	1	0.0147115	1	1	0	1	1
Anatum	group_3512		hypothetical protein	2	0	0	76	100	100	inf	0.000333	1	0.0147115	1	1	0	1	1
Anatum	group_3513	symE_2	Toxic protein SymE	2	0	0	76	100	100	inf	0.000333	1	0.0147115	1	1	0	1	1
Anatum	group_3514		hypothetical protein	2	0	0	76	100	100	inf	0.000333	1	0.0147115	1	1	0	1	1
Anatum	group_3515	ileS	Isoleucine--tRNA ligase	2	0	0	76	100	100	inf	0.000333	1	0.0147115	1	1	0	1	1
Anatum	group_3529		hypothetical protein	2	0	0	76	100	100	inf	0.000333	1	0.0147115	1	1	0	1	1
Anatum	group_3530		hypothetical protein	2	0	0	76	100	100	inf	0.000333	1	0.0147115	1	1	0	1	1
Anatum	group_3531		hypothetical protein	2	0	0	76	100	100	inf	0.000333	1	0.0147115	1	1	0	1	1
Anatum	group_3532		hypothetical protein	2	0	0	76	100	100	inf	0.000333	1	0.0147115	1	1	0	1	1
Anatum	group_3533		hypothetical protein	2	0	0	76	100	100	inf	0.000333	1	0.0147115	1	1	0	1	1
Anatum	group_3534		hypothetical protein	2	0	0	76	100	100	inf	0.000333	1	0.0147115	1	1	0	1	1
Anatum	group_3535		hypothetical protein	2	0	0	76	100	100	inf	0.000333	1	0.0147115	1	1	0	1	1
Anatum	group_1912		hypothetical protein	2	1	0	75	100	98.6842	inf	0.000999001	1	0.0408517	1	1	0	1	1
Anatum	group_1915		hypothetical protein	2	1	0	75	100	98.6842	inf	0.000999001	1	0.0408517	1	1	0	1	1
Anatum	hsdM		Type I restriction enzyme EcoKI M protein	2	1	0	75	100	98.6842	inf	0.000999001	1	0.0408517	1	1	0	1	1
Anatum	group_1946		hypothetical protein	2	1	0	75	100	98.6842	inf	0.000999001	1	0.0408517	1	1	0	1	1
Anatum	group_2807		hypothetical protein	2	1	0	75	100	98.6842	inf	0.000999001	1	0.0408517	1	1	0	1	1
Anatum	group_3357		hypothetical protein	2	1	0	75	100	98.6842	inf	0.000999001	1	0.0408517	1	1	0	1	1
Anatum	group_3358	mrr	Mrr restriction system protein	2	1	0	75	100	98.6842	inf	0.000999001	1	0.0408517	1	1	0	1	1
Anatum	group_3361	faeE	Chaperone protein FaeE	2	1	0	75	100	98.6842	inf	0.000999001	1	0.0408517	1	1	0	1	1
Anatum	group_3362		hypothetical protein	2	1	0	75	100	98.6842	inf	0.000999001	1	0.0408517	1	1	0	1	1
Berta	rhaB_2		Rhamnulokinase	2	0	0	76	100	100	inf	0.000333	1	0.0358193	1	1	0	1	1
Berta	group_1107		hypothetical protein	2	0	0	76	100	100	inf	0.000333	1	0.0358193	1	1	0	1	1
Berta	group_183		hypothetical protein	2	0	0	76	100	100	inf	0.000333	1	0.0358193	1	1	0	1	1
Berta	group_269		hypothetical protein	2	0	0	76	100	100	inf	0.000333	1	0.0358193	1	1	0	1	1
Berta	group_5544		hypothetical protein	2	0	0	76	100	100	inf	0.000333	1	0.0358193	1	1	0	1	1
Berta	group_5545		hypothetical protein	2	0	0	76	100	100	inf	0.000333	1	0.0358193	1	1	0	1	1
Berta	group_5546		hypothetical protein	2	0	0	76	100	100	inf	0.000333	1	0.0358193	1	1	0	1	1
Berta	group_5547		hypothetical protein	2	0	0	76	100	100	inf	0.000333	1	0.0358193	1	1	0	1	1
Berta	group_5549		hypothetical protein	2	0	0	76	100	100	inf	0.000333	1	0.0358193	1	1	0	1	1
Berta	group_5550		hypothetical protein	2	0	0	76	100	100	inf	0.000333	1	0.0358193	1	1	0	1	1
Berta	group_5551		hypothetical protein	2	0	0	76	100	100	inf	0.000333	1	0.0358193	1	1	0	1	1
Berta	group_5552		hypothetical protein	2	0	0	76	100	100	inf	0.000333	1	0.0358193	1	1	0	1	1
Berta	group_5553		hypothetical protein	2	0	0	76	100	100	inf	0.000333	1	0.0358193	1	1	0	1	1
Berta	rhsD_1		Protein RhsD	2	0	0	76	100	100	inf	0.000333	1	0.0358193	1	1	0	1	1
Berta	group_5555		hypothetical protein	2	0	0	76	100	100	inf	0.000333	1	0.0358193	1	1	0	1	1
Berta	group_5556		hypothetical protein	2	0	0	76	100	100	inf	0.000333	1	0.0358193	1	1	0	1	1
Berta	group_5557		hypothetical protein	2	0	0	76	100	100	inf	0.000333	1	0.0358193	1	1	0	1	1
Berta	group_5558		hypothetical protein	2	0	0	76	100	100	inf	0.000333	1	0.0358193	1	1	0	1	1
Berta	group_5559		hypothetical protein	2	0	0	76	100	100	inf	0.000333	1	0.0358193	1	1	0	1	1
Berta	group_5560		hypothetical protein	2	0	0	76	100	100	inf	0.000333	1	0.0358193	1	1	0	1	1
Berta	group_5561		hypothetical protein	2	0	0	76	100	100	inf	0.000333	1	0.0358193	1	1	0	1	1
Berta	group_5562		hypothetical protein	2	0	0	76	100	100	inf	0.000333	1	0.0358193	1	1	0	1	1
Berta	group_5563		hypothetical protein	2	0	0	76	100	100	inf	0.000333	1	0.0358193	1	1	0	1	1
Berta	group_5564	sopE	Guanine nucleotide exchange factor SopE	2	0	0	76	100	100	inf	0.000333	1	0.0358193	1	1	0	1	1
Berta	group_5565		hypothetical protein	2	0	0	76	100	100	inf	0.000333	1	0.0358193	1	1	0	1	1
Berta	group_5566		hypothetical protein	2	0	0	76	100	100	inf	0.000333	1	0.0358193	1	1	0	1	1
Berta	group_5567		hypothetical protein	2	0	0	76	100	100	inf	0.000333	1	0.0358193	1	1	0	1	1
Berta	group_5568		hypothetical protein	2	0	0	76	100	100	inf	0.000333	1	0.0358193	1	1	0	1	1
Berta	group_5569		hypothetical protein	2	0	0	76	100	100	inf	0.000333	1	0.0358193	1	1	0	1	1
Berta	group_5570		hypothetical protein	2	0	0	76	100	100	inf	0.000333	1	0.0358193	1	1	0	1	1
Berta	group_5571		hypothetical protein	2	0	0	76	100	100	inf	0.000333	1	0.0358193	1	1	0	1	1
Berta	group_5572		hypothetical protein	2	0	0	76	100	100	inf	0.000333	1	0.0358193	1	1	0	1	1
Berta	group_5573		hypothetical protein	2	0	0	76	100	100	inf	0.000333	1	0.0358193	1	1	0	1	1
Berta	group_5574	rraB	Regulator of ribonuclease activity B	2	0	0	76	100	100	inf	0.000333	1	0.0358193	1	1	0	1	1
Berta	group_5575		hypothetical protein	2	0	0	76	100	100	inf	0.000333	1	0.0358193	1	1	0	1	1
Berta	group_5576		hypothetical protein	2	0	0	76	100	100	inf	0.000333	1	0.0358193	1	1	0	1	1
Berta	group_5577		hypothetical protein	2	0	0	76	100	100	inf	0.000333	1	0.0358193	1	1	0	1	1
Berta	group_5578		hypothetical protein	2	0	0	76	100	100	inf	0.000333	1	0.0358193	1	1	0	1	1
Berta	group_5579		hypothetical protein	2	0	0	76	100	100	inf	0.000333	1	0.0358193	1	1	0	1	1
Berta	allB_2		Allantoinase	2	0	0	76	100	100	inf	0.000333	1	0.0358193	1	1	0	1	1
Berta	dmsA_2		Dimethyl sulfoxide reductase DmsA	2	0	0	76	100	100	inf	0.000333	1	0.0358193	1	1	0	1	1
Berta	group_765		hypothetical protein	2	0	0	76	100	100	inf	0.000333	1	0.0358193	1	1	0	1	1
Berta	yhhJ_1		Inner membrane transport permease YhhJ	2	0	0	76	100	100	inf	0.000333	1	0.0358193	1	1	0	1	1
Braenderup	group_347		hypothetical protein	5	0	0	73	100	100	inf	4.73685e-08	0.000234379	2.44145e-06	1	1	0	1	1
Braenderup	group_4180		hypothetical protein	5	0	0	73	100	100	inf	4.73685e-08	0.000234379	2.44145e-06	1	1	0	1	1
Braenderup	group_4187		hypothetical protein	5	0	0	73	100	100	inf	4.73685e-08	0.000234379	2.44145e-06	1	1	0	1	1
Braenderup	group_4188		hypothetical protein	5	0	0	73	100	100	inf	4.73685e-08	0.000234379	2.44145e-06	1	1	0	1	1
Braenderup	group_4191		hypothetical protein	5	0	0	73	100	100	inf	4.73685e-08	0.000234379	2.44145e-06	1	1	0	1	1
Braenderup	group_4192		hypothetical protein	5	0	0	73	100	100	inf	4.73685e-08	0.000234379	2.44145e-06	1	1	0	1	1
Braenderup	group_4194		hypothetical protein	5	0	0	73	100	100	inf	4.73685e-08	0.000234379	2.44145e-06	1	1	0	1	1
Braenderup	group_4195		hypothetical protein	5	0	0	73	100	100	inf	4.73685e-08	0.000234379	2.44145e-06	1	1	0	1	1
Braenderup	group_4196		hypothetical protein	5	0	0	73	100	100	inf	4.73685e-08	0.000234379	2.44145e-06	1	1	0	1	1
Braenderup	group_4197		hypothetical protein	5	0	0	73	100	100	inf	4.73685e-08	0.000234379	2.44145e-06	1	1	0	1	1
Braenderup	dtd3		D-aminoacyl-tRNA deacylase	5	0	0	73	100	100	inf	4.73685e-08	0.000234379	2.44145e-06	1	1	0	1	1
Braenderup	group_4199		hypothetical protein	5	0	0	73	100	100	inf	4.73685e-08	0.000234379	2.44145e-06	1	1	0	1	1
Braenderup	group_4200		hypothetical protein	5	0	0	73	100	100	inf	4.73685e-08	0.000234379	2.44145e-06	1	1	0	1	1
Braenderup	group_4201	xerC_1	Tyrosine recombinase XerC	5	0	0	73	100	100	inf	4.73685e-08	0.000234379	2.44145e-06	1	1	0	1	1
Braenderup	group_4202		hypothetical protein	5	0	0	73	100	100	inf	4.73685e-08	0.000234379	2.44145e-06	1	1	0	1	1
Braenderup	group_4203		hypothetical protein	5	0	0	73	100	100	inf	4.73685e-08	0.000234379	2.44145e-06	1	1	0	1	1
Braenderup	group_4204		hypothetical protein	5	0	0	73	100	100	inf	4.73685e-08	0.000234379	2.44145e-06	1	1	0	1	1
Braenderup	group_4205		hypothetical protein	5	0	0	73	100	100	inf	4.73685e-08	0.000234379	2.44145e-06	1	1	0	1	1
Braenderup	group_4206		hypothetical protein	5	0	0	73	100	100	inf	4.73685e-08	0.000234379	2.44145e-06	1	1	0	1	1
Braenderup	group_4207		hypothetical protein	5	0	0	73	100	100	inf	4.73685e-08	0.000234379	2.44145e-06	1	1	0	1	1
Braenderup	group_4208		hypothetical protein	5	0	0	73	100	100	inf	4.73685e-08	0.000234379	2.44145e-06	1	1	0	1	1
Braenderup	group_4209		hypothetical protein	5	0	0	73	100	100	inf	4.73685e-08	0.000234379	2.44145e-06	1	1	0	1	1
Braenderup	rimL_2		Ribosomal-protein-serine acetyltransferase	5	0	0	73	100	100	inf	4.73685e-08	0.000234379	2.44145e-06	1	1	0	1	1
Braenderup	group_4210		hypothetical protein	5	0	0	73	100	100	inf	4.73685e-08	0.000234379	2.44145e-06	1	1	0	1	1
Braenderup	group_4211		hypothetical protein	5	0	0	73	100	100	inf	4.73685e-08	0.000234379	2.44145e-06	1	1	0	1	1
Braenderup	group_4213		hypothetical protein	5	0	0	73	100	100	inf	4.73685e-08	0.000234379	2.44145e-06	1	1	0	1	1
Braenderup	group_4214		hypothetical protein	5	0	0	73	100	100	inf	4.73685e-08	0.000234379	2.44145e-06	1	1	0	1	1
Braenderup	group_4219		hypothetical protein	5	0	0	73	100	100	inf	4.73685e-08	0.000234379	2.44145e-06	1	1	0	1	1
Braenderup	group_4237	symE	Toxic protein SymE	5	0	0	73	100	100	inf	4.73685e-08	0.000234379	2.44145e-06	1	1	0	1	1
Braenderup	group_4238		hypothetical protein	5	0	0	73	100	100	inf	4.73685e-08	0.000234379	2.44145e-06	1	1	0	1	1
Braenderup	group_4239		hypothetical protein	5	0	0	73	100	100	inf	4.73685e-08	0.000234379	2.44145e-06	1	1	0	1	1
Braenderup	group_4240		hypothetical protein	5	0	0	73	100	100	inf	4.73685e-08	0.000234379	2.44145e-06	1	1	0	1	1
Braenderup	group_4241		hypothetical protein	5	0	0	73	100	100	inf	4.73685e-08	0.000234379	2.44145e-06	1	1	0	1	1
Braenderup	group_4242		hypothetical protein	5	0	0	73	100	100	inf	4.73685e-08	0.000234379	2.44145e-06	1	1	0	1	1
Braenderup	group_4243		hypothetical protein	5	0	0	73	100	100	inf	4.73685e-08	0.000234379	2.44145e-06	1	1	0	1	1
Braenderup	group_4244		hypothetical protein	5	0	0	73	100	100	inf	4.73685e-08	0.000234379	2.44145e-06	1	1	0	1	1
Braenderup	group_4245		hypothetical protein	5	0	0	73	100	100	inf	4.73685e-08	0.000234379	2.44145e-06	1	1	0	1	1
Braenderup	group_4247		hypothetical protein	5	0	0	73	100	100	inf	4.73685e-08	0.000234379	2.44145e-06	1	1	0	1	1
Braenderup	group_4249		hypothetical protein	5	0	0	73	100	100	inf	4.73685e-08	0.000234379	2.44145e-06	1	1	0	1	1
Braenderup	group_4250		hypothetical protein	5	0	0	73	100	100	inf	4.73685e-08	0.000234379	2.44145e-06	1	1	0	1	1
Braenderup	group_4251		hypothetical protein	5	0	0	73	100	100	inf	4.73685e-08	0.000234379	2.44145e-06	1	1	0	1	1
Braenderup	group_4252		hypothetical protein	5	0	0	73	100	100	inf	4.73685e-08	0.000234379	2.44145e-06	1	1	0	1	1
Braenderup	group_4253		putative HTH-type transcriptional regulator	5	0	0	73	100	100	inf	4.73685e-08	0.000234379	2.44145e-06	1	1	0	1	1
Braenderup	group_4254		hypothetical protein	5	0	0	73	100	100	inf	4.73685e-08	0.000234379	2.44145e-06	1	1	0	1	1
Braenderup	group_4255		hypothetical protein	5	0	0	73	100	100	inf	4.73685e-08	0.000234379	2.44145e-06	1	1	0	1	1
Braenderup	group_4256		hypothetical protein	5	0	0	73	100	100	inf	4.73685e-08	0.000234379	2.44145e-06	1	1	0	1	1
Braenderup	group_4257		hypothetical protein	5	0	0	73	100	100	inf	4.73685e-08	0.000234379	2.44145e-06	1	1	0	1	1
Braenderup	group_4258		hypothetical protein	5	0	0	73	100	100	inf	4.73685e-08	0.000234379	2.44145e-06	1	1	0	1	1
Braenderup	group_4259		hypothetical protein	5	0	0	73	100	100	inf	4.73685e-08	0.000234379	2.44145e-06	1	1	0	1	1
Braenderup	group_4260		hypothetical protein	5	0	0	73	100	100	inf	4.73685e-08	0.000234379	2.44145e-06	1	1	0	1	1
Braenderup	group_4261		hypothetical protein	5	0	0	73	100	100	inf	4.73685e-08	0.000234379	2.44145e-06	1	1	0	1	1
Braenderup	group_4262		hypothetical protein	5	0	0	73	100	100	inf	4.73685e-08	0.000234379	2.44145e-06	1	1	0	1	1
Braenderup	group_4264		hypothetical protein	5	0	0	73	100	100	inf	4.73685e-08	0.000234379	2.44145e-06	1	1	0	1	1
Braenderup	group_4268		hypothetical protein	5	0	0	73	100	100	inf	4.73685e-08	0.000234379	2.44145e-06	1	1	0	1	1
Braenderup	group_4269		hypothetical protein	5	0	0	73	100	100	inf	4.73685e-08	0.000234379	2.44145e-06	1	1	0	1	1
Braenderup	group_4271		hypothetical protein	5	0	0	73	100	100	inf	4.73685e-08	0.000234379	2.44145e-06	1	1	0	1	1
Braenderup	group_4272		hypothetical protein	5	0	0	73	100	100	inf	4.73685e-08	0.000234379	2.44145e-06	1	1	0	1	1
Braenderup	group_4273		hypothetical protein	5	0	0	73	100	100	inf	4.73685e-08	0.000234379	2.44145e-06	1	1	0	1	1
Braenderup	vgrG1_1		Actin cross-linking toxin VgrG1	5	0	0	73	100	100	inf	4.73685e-08	0.000234379	2.44145e-06	1	1	0	1	1
Braenderup	csbX_2		Alpha-ketoglutarate permease	5	0	0	73	100	100	inf	4.73685e-08	0.000234379	2.44145e-06	1	1	0	1	1
Braenderup	apsI		D-apiose isomerase	5	0	0	73	100	100	inf	4.73685e-08	0.000234379	2.44145e-06	1	1	0	1	1
Braenderup	murR_2		HTH-type transcriptional regulator MurR	5	0	0	73	100	100	inf	4.73685e-08	0.000234379	2.44145e-06	1	1	0	1	1
Braenderup	group_4280	rbsK_1	Ribokinase	5	0	0	73	100	100	inf	4.73685e-08	0.000234379	2.44145e-06	1	1	0	1	1
Braenderup	group_4282		hypothetical protein	5	0	0	73	100	100	inf	4.73685e-08	0.000234379	2.44145e-06	1	1	0	1	1
Braenderup	group_4284		hypothetical protein	5	0	0	73	100	100	inf	4.73685e-08	0.000234379	2.44145e-06	1	1	0	1	1
Braenderup	group_4286		hypothetical protein	5	0	0	73	100	100	inf	4.73685e-08	0.000234379	2.44145e-06	1	1	0	1	1
Braenderup	group_4288		hypothetical protein	5	0	0	73	100	100	inf	4.73685e-08	0.000234379	2.44145e-06	1	1	0	1	1
Braenderup	group_4290		hypothetical protein	5	0	0	73	100	100	inf	4.73685e-08	0.000234379	2.44145e-06	1	1	0	1	1
Braenderup	group_4291		hypothetical protein	5	0	0	73	100	100	inf	4.73685e-08	0.000234379	2.44145e-06	1	1	0	1	1
Braenderup	group_4292		hypothetical protein	5	0	0	73	100	100	inf	4.73685e-08	0.000234379	2.44145e-06	1	1	0	1	1
Braenderup	group_4293		hypothetical protein	5	0	0	73	100	100	inf	4.73685e-08	0.000234379	2.44145e-06	1	1	0	1	1
Braenderup	group_4294		hypothetical protein	5	0	0	73	100	100	inf	4.73685e-08	0.000234379	2.44145e-06	1	1	0	1	1
Braenderup	group_4295		hypothetical protein	5	0	0	73	100	100	inf	4.73685e-08	0.000234379	2.44145e-06	1	1	0	1	1
Braenderup	group_4296		hypothetical protein	5	0	0	73	100	100	inf	4.73685e-08	0.000234379	2.44145e-06	1	1	0	1	1
Braenderup	group_4297		hypothetical protein	5	0	0	73	100	100	inf	4.73685e-08	0.000234379	2.44145e-06	1	1	0	1	1
Braenderup	group_4298		hypothetical protein	5	0	0	73	100	100	inf	4.73685e-08	0.000234379	2.44145e-06	1	1	0	1	1
Braenderup	group_4299		hypothetical protein	5	0	0	73	100	100	inf	4.73685e-08	0.000234379	2.44145e-06	1	1	0	1	1
Braenderup	group_4300		hypothetical protein	5	0	0	73	100	100	inf	4.73685e-08	0.000234379	2.44145e-06	1	1	0	1	1
Braenderup	group_4301		hypothetical protein	5	0	0	73	100	100	inf	4.73685e-08	0.000234379	2.44145e-06	1	1	0	1	1
Braenderup	group_4302	intS_2	Prophage integrase IntS	5	0	0	73	100	100	inf	4.73685e-08	0.000234379	2.44145e-06	1	1	0	1	1
Braenderup	group_4303		hypothetical protein	5	0	0	73	100	100	inf	4.73685e-08	0.000234379	2.44145e-06	1	1	0	1	1
Braenderup	pknD		Serine/threonine-protein kinase PknD	5	0	0	73	100	100	inf	4.73685e-08	0.000234379	2.44145e-06	1	1	0	1	1
Braenderup	group_4305		hypothetical protein	5	0	0	73	100	100	inf	4.73685e-08	0.000234379	2.44145e-06	1	1	0	1	1
Braenderup	group_4306		hypothetical protein	5	0	0	73	100	100	inf	4.73685e-08	0.000234379	2.44145e-06	1	1	0	1	1
Braenderup	group_4307		hypothetical protein	5	0	0	73	100	100	inf	4.73685e-08	0.000234379	2.44145e-06	1	1	0	1	1
Braenderup	group_4308		hypothetical protein	5	0	0	73	100	100	inf	4.73685e-08	0.000234379	2.44145e-06	1	1	0	1	1
Braenderup	group_4309		hypothetical protein	5	0	0	73	100	100	inf	4.73685e-08	0.000234379	2.44145e-06	1	1	0	1	1
Braenderup	group_4310		hypothetical protein	5	0	0	73	100	100	inf	4.73685e-08	0.000234379	2.44145e-06	1	1	0	1	1
Braenderup	group_4311	thiS	Sulfur carrier protein ThiS	5	0	0	73	100	100	inf	4.73685e-08	0.000234379	2.44145e-06	1	1	0	1	1
Braenderup	group_4312		hypothetical protein	5	0	0	73	100	100	inf	4.73685e-08	0.000234379	2.44145e-06	1	1	0	1	1
Braenderup	group_50		hypothetical protein	5	0	0	73	100	100	inf	4.73685e-08	0.000234379	2.44145e-06	1	1	0	1	1
Braenderup	group_638		hypothetical protein	5	0	0	73	100	100	inf	4.73685e-08	0.000234379	2.44145e-06	1	1	0	1	1
Braenderup	rhsA_1		putative deoxyribonuclease RhsA	5	0	0	73	100	100	inf	4.73685e-08	0.000234379	2.44145e-06	1	1	0	1	1
Braenderup	group_92		hypothetical protein	5	0	0	73	100	100	inf	4.73685e-08	0.000234379	2.44145e-06	1	1	0	1	1
Braenderup	group_1333		hypothetical protein	5	1	0	72	100	98.6301	inf	2.84211e-07	0.00140628	1.18174e-05	1	1	0	1	1
Braenderup	group_1429		hypothetical protein	5	1	0	72	100	98.6301	inf	2.84211e-07	0.00140628	1.18174e-05	1	1	0	1	1
Braenderup	group_1430		hypothetical protein	5	1	0	72	100	98.6301	inf	2.84211e-07	0.00140628	1.18174e-05	1	1	0	1	1
Braenderup	group_1431		hypothetical protein	5	1	0	72	100	98.6301	inf	2.84211e-07	0.00140628	1.18174e-05	1	1	0	1	1
Braenderup	group_1432		hypothetical protein	5	1	0	72	100	98.6301	inf	2.84211e-07	0.00140628	1.18174e-05	1	1	0	1	1
Braenderup	group_1790		hypothetical protein	5	1	0	72	100	98.6301	inf	2.84211e-07	0.00140628	1.18174e-05	1	1	0	1	1
Braenderup	group_1795		hypothetical protein	5	1	0	72	100	98.6301	inf	2.84211e-07	0.00140628	1.18174e-05	1	1	0	1	1
Braenderup	group_2229		hypothetical protein	5	1	0	72	100	98.6301	inf	2.84211e-07	0.00140628	1.18174e-05	1	1	0	1	1
Braenderup	group_2230		hypothetical protein	5	1	0	72	100	98.6301	inf	2.84211e-07	0.00140628	1.18174e-05	1	1	0	1	1
Braenderup	group_229		hypothetical protein	5	1	0	72	100	98.6301	inf	2.84211e-07	0.00140628	1.18174e-05	1	1	0	1	1
Braenderup	group_2353		hypothetical protein	5	1	0	72	100	98.6301	inf	2.84211e-07	0.00140628	1.18174e-05	1	1	0	1	1
Braenderup	group_2354		hypothetical protein	5	1	0	72	100	98.6301	inf	2.84211e-07	0.00140628	1.18174e-05	1	1	0	1	1
Braenderup	group_2355		hypothetical protein	5	1	0	72	100	98.6301	inf	2.84211e-07	0.00140628	1.18174e-05	1	1	0	1	1
Braenderup	group_2356		hypothetical protein	5	1	0	72	100	98.6301	inf	2.84211e-07	0.00140628	1.18174e-05	1	1	0	1	1
Braenderup	group_2357		hypothetical protein	5	1	0	72	100	98.6301	inf	2.84211e-07	0.00140628	1.18174e-05	1	1	0	1	1
Braenderup	group_2358		hypothetical protein	5	1	0	72	100	98.6301	inf	2.84211e-07	0.00140628	1.18174e-05	1	1	0	1	1
Braenderup	group_2359		hypothetical protein	5	1	0	72	100	98.6301	inf	2.84211e-07	0.00140628	1.18174e-05	1	1	0	1	1
Braenderup	group_2360		hypothetical protein	5	1	0	72	100	98.6301	inf	2.84211e-07	0.00140628	1.18174e-05	1	1	0	1	1
Braenderup	group_2361		hypothetical protein	5	1	0	72	100	98.6301	inf	2.84211e-07	0.00140628	1.18174e-05	1	1	0	1	1
Braenderup	group_2365		hypothetical protein	5	1	0	72	100	98.6301	inf	2.84211e-07	0.00140628	1.18174e-05	1	1	0	1	1
Braenderup	group_4215		hypothetical protein	5	1	0	72	100	98.6301	inf	2.84211e-07	0.00140628	1.18174e-05	1	1	0	1	1
Braenderup	group_775		hypothetical protein	5	1	0	72	100	98.6301	inf	2.84211e-07	0.00140628	1.18174e-05	1	1	0	1	1
Braenderup	group_1939		hypothetical protein	5	2	0	71	100	97.2603	inf	9.94738e-07	0.00492196	3.67311e-05	1	1	0	1	1
Braenderup	group_2050		hypothetical protein	5	2	0	71	100	97.2603	inf	9.94738e-07	0.00492196	3.67311e-05	1	1	0	1	1
Braenderup	group_2051		hypothetical protein	5	2	0	71	100	97.2603	inf	9.94738e-07	0.00492196	3.67311e-05	1	1	0	1	1
Braenderup	group_2052		hypothetical protein	5	2	0	71	100	97.2603	inf	9.94738e-07	0.00492196	3.67311e-05	1	1	0	1	1
Braenderup	group_2053	ybiI_2	putative protein YbiI	5	2	0	71	100	97.2603	inf	9.94738e-07	0.00492196	3.67311e-05	1	1	0	1	1
Braenderup	group_2054		hypothetical protein	5	2	0	71	100	97.2603	inf	9.94738e-07	0.00492196	3.67311e-05	1	1	0	1	1
Braenderup	group_2260		hypothetical protein	5	2	0	71	100	97.2603	inf	9.94738e-07	0.00492196	3.67311e-05	1	1	0	1	1
Braenderup	group_2774		hypothetical protein	5	2	0	71	100	97.2603	inf	9.94738e-07	0.00492196	3.67311e-05	1	1	0	1	1
Braenderup	group_3324		hypothetical protein	5	2	0	71	100	97.2603	inf	9.94738e-07	0.00492196	3.67311e-05	1	1	0	1	1
Braenderup	group_3395		hypothetical protein	5	2	0	71	100	97.2603	inf	9.94738e-07	0.00492196	3.67311e-05	1	1	0	1	1
Braenderup	group_3408		hypothetical protein	5	2	0	71	100	97.2603	inf	9.94738e-07	0.00492196	3.67311e-05	1	1	0	1	1
Braenderup	group_3409		hypothetical protein	5	2	0	71	100	97.2603	inf	9.94738e-07	0.00492196	3.67311e-05	1	1	0	1	1
Braenderup	insK		Putative transposase InsK for insertion sequence element IS150	5	2	0	71	100	97.2603	inf	9.94738e-07	0.00492196	3.67311e-05	1	1	0	1	1
Braenderup	group_4119		hypothetical protein	5	2	0	71	100	97.2603	inf	9.94738e-07	0.00492196	3.67311e-05	1	1	0	1	1
Braenderup	group_4131		hypothetical protein	5	2	0	71	100	97.2603	inf	9.94738e-07	0.00492196	3.67311e-05	1	1	0	1	1
Braenderup	group_1143		hypothetical protein	5	3	0	70	100	95.8904	inf	2.65263e-06	0.0131252	9.05189e-05	1	1	0	1	1
Braenderup	dam_1		DNA adenine methylase	5	3	0	70	100	95.8904	inf	2.65263e-06	0.0131252	9.05189e-05	1	1	0	1	1
Braenderup	group_1954		hypothetical protein	5	3	0	70	100	95.8904	inf	2.65263e-06	0.0131252	9.05189e-05	1	1	0	1	1
Braenderup	group_2234		hypothetical protein	5	3	0	70	100	95.8904	inf	2.65263e-06	0.0131252	9.05189e-05	1	1	0	1	1
Braenderup	group_2235		hypothetical protein	5	3	0	70	100	95.8904	inf	2.65263e-06	0.0131252	9.05189e-05	1	1	0	1	1
Braenderup	group_2918		hypothetical protein	5	3	0	70	100	95.8904	inf	2.65263e-06	0.0131252	9.05189e-05	1	1	0	1	1
Braenderup	group_3301		hypothetical protein	5	3	0	70	100	95.8904	inf	2.65263e-06	0.0131252	9.05189e-05	1	1	0	1	1
Braenderup	group_3354		hypothetical protein	5	3	0	70	100	95.8904	inf	2.65263e-06	0.0131252	9.05189e-05	1	1	0	1	1
Braenderup	group_4263		hypothetical protein	5	3	0	70	100	95.8904	inf	2.65263e-06	0.0131252	9.05189e-05	1	1	0	1	1
Braenderup	group_4266	caf1M	Chaperone protein caf1M	5	3	0	70	100	95.8904	inf	2.65263e-06	0.0131252	9.05189e-05	1	1	0	1	1
Braenderup	group_4267		hypothetical protein	5	3	0	70	100	95.8904	inf	2.65263e-06	0.0131252	9.05189e-05	1	1	0	1	1
Braenderup	group_4313		hypothetical protein	4	0	1	73	80	100	inf	3.50527e-06	0.0173441	0.000117987	1	1	0	1	1
Braenderup	pxpC_2		5-oxoprolinase subunit C	4	0	1	73	80	100	inf	3.50527e-06	0.0173441	0.000117987	1	1	0	1	1
Braenderup	group_2039		hypothetical protein	5	4	0	69	100	94.5205	inf	5.96843e-06	0.0295318	0.000196879	1	1	0	1	1
Braenderup	group_2040		hypothetical protein	5	4	0	69	100	94.5205	inf	5.96843e-06	0.0295318	0.000196879	1	1	0	1	1
Braenderup	group_2055		hypothetical protein	5	4	0	69	100	94.5205	inf	5.96843e-06	0.0295318	0.000196879	1	1	0	1	1
Braenderup	group_1003		hypothetical protein	5	5	0	68	100	93.1507	inf	1.19369e-05	0.0590636	0.000360144	1	1	0	1	1
Braenderup	group_1965	thiF	Sulfur carrier protein ThiS adenylyltransferase	5	5	0	68	100	93.1507	inf	1.19369e-05	0.0590636	0.000360144	1	1	0	1	1
Braenderup	group_2069		hypothetical protein	5	5	0	68	100	93.1507	inf	1.19369e-05	0.0590636	0.000360144	1	1	0	1	1
Braenderup	group_2070		hypothetical protein	5	5	0	68	100	93.1507	inf	1.19369e-05	0.0590636	0.000360144	1	1	0	1	1
Braenderup	group_2071		hypothetical protein	5	5	0	68	100	93.1507	inf	1.19369e-05	0.0590636	0.000360144	1	1	0	1	1
Braenderup	group_2073		hypothetical protein	5	5	0	68	100	93.1507	inf	1.19369e-05	0.0590636	0.000360144	1	1	0	1	1
Braenderup	group_2074	xerC_2	Tyrosine recombinase XerC	5	5	0	68	100	93.1507	inf	1.19369e-05	0.0590636	0.000360144	1	1	0	1	1
Braenderup	pgrR_2		HTH-type transcriptional regulator PgrR	5	5	0	68	100	93.1507	inf	1.19369e-05	0.0590636	0.000360144	1	1	0	1	1
Braenderup	yhdN		Aldo-keto reductase IolS	5	5	0	68	100	93.1507	inf	1.19369e-05	0.0590636	0.000360144	1	1	0	1	1
Braenderup	group_4246		hypothetical protein	5	5	0	68	100	93.1507	inf	1.19369e-05	0.0590636	0.000360144	1	1	0	1	1
Braenderup	group_4248		hypothetical protein	5	5	0	68	100	93.1507	inf	1.19369e-05	0.0590636	0.000360144	1	1	0	1	1
Braenderup	group_4285		hypothetical protein	5	5	0	68	100	93.1507	inf	1.19369e-05	0.0590636	0.000360144	1	1	0	1	1
Braenderup	gpFI_2		Putative prophage major tail sheath protein	5	5	0	68	100	93.1507	inf	1.19369e-05	0.0590636	0.000360144	1	1	0	1	1
Braenderup	group_4289		hypothetical protein	5	5	0	68	100	93.1507	inf	1.19369e-05	0.0590636	0.000360144	1	1	0	1	1
Braenderup	group_1433		hypothetical protein	5	6	0	67	100	91.7808	inf	2.18842e-05	0.108283	0.000622317	1	1	0	1	1
Braenderup	group_1434		hypothetical protein	5	6	0	67	100	91.7808	inf	2.18842e-05	0.108283	0.000622317	1	1	0	1	1
Braenderup	group_1435		hypothetical protein	5	6	0	67	100	91.7808	inf	2.18842e-05	0.108283	0.000622317	1	1	0	1	1
Braenderup	group_1843		hypothetical protein	5	6	0	67	100	91.7808	inf	2.18842e-05	0.108283	0.000622317	1	1	0	1	1
Braenderup	group_1914		hypothetical protein	5	6	0	67	100	91.7808	inf	2.18842e-05	0.108283	0.000622317	1	1	0	1	1
Braenderup	group_2257		hypothetical protein	5	6	0	67	100	91.7808	inf	2.18842e-05	0.108283	0.000622317	1	1	0	1	1
Braenderup	group_2367		hypothetical protein	5	6	0	67	100	91.7808	inf	2.18842e-05	0.108283	0.000622317	1	1	0	1	1
Braenderup	group_2368		hypothetical protein	5	6	0	67	100	91.7808	inf	2.18842e-05	0.108283	0.000622317	1	1	0	1	1
Braenderup	group_4276		hypothetical protein	5	6	0	67	100	91.7808	inf	2.18842e-05	0.108283	0.000622317	1	1	0	1	1
Braenderup	group_601		hypothetical protein	5	6	0	67	100	91.7808	inf	2.18842e-05	0.108283	0.000622317	1	1	0	1	1
Braenderup	group_2067		hypothetical protein	5	7	0	66	100	90.411	inf	3.75158e-05	0.185628	0.00101994	1	1	0	1	1
Braenderup	group_2076		hypothetical protein	5	7	0	66	100	90.411	inf	3.75158e-05	0.185628	0.00101994	1	1	0	1	1
Braenderup	group_3398		hypothetical protein	5	7	0	66	100	90.411	inf	3.75158e-05	0.185628	0.00101994	1	1	0	1	1
Braenderup	panS		Pantothenate precursors transporter PanS	5	7	0	66	100	90.411	inf	3.75158e-05	0.185628	0.00101994	1	1	0	1	1
Braenderup	group_1150		hypothetical protein	5	8	0	65	100	89.0411	inf	6.09632e-05	0.301646	0.00157107	1	1	0	1	1
Braenderup	group_1152		hypothetical protein	5	8	0	65	100	89.0411	inf	6.09632e-05	0.301646	0.00157107	1	1	0	1	1
Braenderup	group_1949		hypothetical protein	5	8	0	65	100	89.0411	inf	6.09632e-05	0.301646	0.00157107	1	1	0	1	1
Braenderup	group_2064		hypothetical protein	5	8	0	65	100	89.0411	inf	6.09632e-05	0.301646	0.00157107	1	1	0	1	1
Braenderup	group_407		hypothetical protein	5	8	0	65	100	89.0411	inf	6.09632e-05	0.301646	0.00157107	1	1	0	1	1
Braenderup	group_4216		hypothetical protein	5	8	0	65	100	89.0411	inf	6.09632e-05	0.301646	0.00157107	1	1	0	1	1
Braenderup	group_4283		hypothetical protein	5	8	0	65	100	89.0411	inf	6.09632e-05	0.301646	0.00157107	1	1	0	1	1
Braenderup	group_616		hypothetical protein	5	8	0	65	100	89.0411	inf	6.09632e-05	0.301646	0.00157107	1	1	0	1	1
Braenderup	group_619		hypothetical protein	5	8	0	65	100	89.0411	inf	6.09632e-05	0.301646	0.00157107	1	1	0	1	1
Braenderup	group_1341		hypothetical protein	5	9	0	64	100	87.6712	inf	9.48317e-05	0.469227	0.00218245	1	1	0	1	1
Braenderup	group_2068		hypothetical protein	5	9	0	64	100	87.6712	inf	9.48317e-05	0.469227	0.00218245	1	1	0	1	1
Braenderup	group_4179		hypothetical protein	5	9	0	64	100	87.6712	inf	9.48317e-05	0.469227	0.00218245	1	1	0	1	1
Braenderup	hexR_1		HTH-type transcriptional regulator HexR	5	9	0	64	100	87.6712	inf	9.48317e-05	0.469227	0.00218245	1	1	0	1	1
Braenderup	xylE_1		D-xylose-proton symporter	5	9	0	64	100	87.6712	inf	9.48317e-05	0.469227	0.00218245	1	1	0	1	1
Braenderup	xylE_2		D-xylose-proton symporter	5	9	0	64	100	87.6712	inf	9.48317e-05	0.469227	0.00218245	1	1	0	1	1
Braenderup	iolB		5-deoxy-glucuronate isomerase	5	9	0	64	100	87.6712	inf	9.48317e-05	0.469227	0.00218245	1	1	0	1	1
Braenderup	bauC		Putative 3-oxopropanoate dehydrogenase	5	9	0	64	100	87.6712	inf	9.48317e-05	0.469227	0.00218245	1	1	0	1	1
Braenderup	rhaR_4		HTH-type transcriptional activator RhaR	5	9	0	64	100	87.6712	inf	9.48317e-05	0.469227	0.00218245	1	1	0	1	1
Braenderup	iolE		Inosose dehydratase	5	9	0	64	100	87.6712	inf	9.48317e-05	0.469227	0.00218245	1	1	0	1	1
Braenderup	iolG_1		Inositol 2-dehydrogenase	5	9	0	64	100	87.6712	inf	9.48317e-05	0.469227	0.00218245	1	1	0	1	1
Braenderup	group_4226		hypothetical protein	5	9	0	64	100	87.6712	inf	9.48317e-05	0.469227	0.00218245	1	1	0	1	1
Braenderup	iolI		Inosose isomerase	5	9	0	64	100	87.6712	inf	9.48317e-05	0.469227	0.00218245	1	1	0	1	1
Braenderup	yfcJ_1		putative MFS-type transporter YfcJ	5	9	0	64	100	87.6712	inf	9.48317e-05	0.469227	0.00218245	1	1	0	1	1
Braenderup	iolC_1		5-dehydro-2-deoxygluconokinase	5	9	0	64	100	87.6712	inf	9.48317e-05	0.469227	0.00218245	1	1	0	1	1
Braenderup	iolD		3D-(3,5/4)-trihydroxycyclohexane-1,2-dione hydrolase	5	9	0	64	100	87.6712	inf	9.48317e-05	0.469227	0.00218245	1	1	0	1	1
Braenderup	iolG_2		Myo-inositol 2-dehydrogenase	5	9	0	64	100	87.6712	inf	9.48317e-05	0.469227	0.00218245	1	1	0	1	1
Braenderup	csbX		Alpha-ketoglutarate permease	5	9	0	64	100	87.6712	inf	9.48317e-05	0.469227	0.00218245	1	1	0	1	1
Braenderup	group_4233		hypothetical protein	5	9	0	64	100	87.6712	inf	9.48317e-05	0.469227	0.00218245	1	1	0	1	1
Braenderup	group_4234		hypothetical protein	5	9	0	64	100	87.6712	inf	9.48317e-05	0.469227	0.00218245	1	1	0	1	1
Braenderup	group_563		hypothetical protein	5	9	0	64	100	87.6712	inf	9.48317e-05	0.469227	0.00218245	1	1	0	1	1
Braenderup	group_1203	intS_1	Prophage integrase IntS	5	10	0	63	100	86.3014	inf	0.000142248	0.703841	0.00294494	1	1	0	1	1
Braenderup	group_1761		hypothetical protein	5	10	0	63	100	86.3014	inf	0.000142248	0.703841	0.00294494	1	1	0	1	1
Braenderup	group_2059		hypothetical protein	5	10	0	63	100	86.3014	inf	0.000142248	0.703841	0.00294494	1	1	0	1	1
Braenderup	group_2060		hypothetical protein	5	10	0	63	100	86.3014	inf	0.000142248	0.703841	0.00294494	1	1	0	1	1
Braenderup	group_2061		hypothetical protein	5	10	0	63	100	86.3014	inf	0.000142248	0.703841	0.00294494	1	1	0	1	1
Braenderup	group_2062		hypothetical protein	5	10	0	63	100	86.3014	inf	0.000142248	0.703841	0.00294494	1	1	0	1	1
Braenderup	group_2832		hypothetical protein	5	10	0	63	100	86.3014	inf	0.000142248	0.703841	0.00294494	1	1	0	1	1
Braenderup	group_3459		hypothetical protein	5	10	0	63	100	86.3014	inf	0.000142248	0.703841	0.00294494	1	1	0	1	1
Braenderup	group_3652		hypothetical protein	5	10	0	63	100	86.3014	inf	0.000142248	0.703841	0.00294494	1	1	0	1	1
Braenderup	group_4178		hypothetical protein	5	10	0	63	100	86.3014	inf	0.000142248	0.703841	0.00294494	1	1	0	1	1
Braenderup	group_4181		hypothetical protein	5	10	0	63	100	86.3014	inf	0.000142248	0.703841	0.00294494	1	1	0	1	1
Braenderup	group_4182		hypothetical protein	5	10	0	63	100	86.3014	inf	0.000142248	0.703841	0.00294494	1	1	0	1	1
Braenderup	group_4183		hypothetical protein	5	10	0	63	100	86.3014	inf	0.000142248	0.703841	0.00294494	1	1	0	1	1
Braenderup	group_4184		hypothetical protein	5	10	0	63	100	86.3014	inf	0.000142248	0.703841	0.00294494	1	1	0	1	1
Braenderup	group_4185		hypothetical protein	5	10	0	63	100	86.3014	inf	0.000142248	0.703841	0.00294494	1	1	0	1	1
Braenderup	group_4186		hypothetical protein	5	10	0	63	100	86.3014	inf	0.000142248	0.703841	0.00294494	1	1	0	1	1
Braenderup	group_4235		hypothetical protein	5	10	0	63	100	86.3014	inf	0.000142248	0.703841	0.00294494	1	1	0	1	1
Braenderup	bspRIM		Modification methylase BspRI	5	10	0	63	100	86.3014	inf	0.000142248	0.703841	0.00294494	1	1	0	1	1
Braenderup	group_4270		hypothetical protein	5	10	0	63	100	86.3014	inf	0.000142248	0.703841	0.00294494	1	1	0	1	1
Braenderup	group_4274		hypothetical protein	5	10	0	63	100	86.3014	inf	0.000142248	0.703841	0.00294494	1	1	0	1	1
Braenderup	rhsA		putative deoxyribonuclease RhsA	5	10	0	63	100	86.3014	inf	0.000142248	0.703841	0.00294494	1	1	0	1	1
Braenderup	group_754		hypothetical protein	5	10	0	63	100	86.3014	inf	0.000142248	0.703841	0.00294494	1	1	0	1	1
Braenderup	group_1197		hypothetical protein	5	11	0	62	100	84.9315	inf	0.000206905	1	0.0041281	1	1	0	1	1
Braenderup	group_1691		hypothetical protein	5	11	0	62	100	84.9315	inf	0.000206905	1	0.0041281	1	1	0	1	1
Braenderup	group_1923	ccmF_1	Cytochrome c-type biogenesis protein CcmF	5	11	0	62	100	84.9315	inf	0.000206905	1	0.0041281	1	1	0	1	1
Braenderup	group_2063		hypothetical protein	5	11	0	62	100	84.9315	inf	0.000206905	1	0.0041281	1	1	0	1	1
Braenderup	group_4088		hypothetical protein	5	11	0	62	100	84.9315	inf	0.000206905	1	0.0041281	1	1	0	1	1
Braenderup	group_4190		hypothetical protein	5	11	0	62	100	84.9315	inf	0.000206905	1	0.0041281	1	1	0	1	1
Braenderup	group_7	oadA_2	Oxaloacetate decarboxylase alpha chain	5	11	0	62	100	84.9315	inf	0.000206905	1	0.0041281	1	1	0	1	1
Braenderup	torI		Response regulator inhibitor for tor operon	5	12	0	61	100	83.5616	inf	0.000293116	1	0.00566538	1	1	0	1	1
Braenderup	group_2075		hypothetical protein	5	12	0	61	100	83.5616	inf	0.000293116	1	0.00566538	1	1	0	1	1
Braenderup	group_3023		hypothetical protein	5	12	0	61	100	83.5616	inf	0.000293116	1	0.00566538	1	1	0	1	1
Braenderup	group_303	apxIB	Toxin RTX-I translocation ATP-binding protein	5	12	0	61	100	83.5616	inf	0.000293116	1	0.00566538	1	1	0	1	1
Braenderup	group_379		hypothetical protein	5	12	0	61	100	83.5616	inf	0.000293116	1	0.00566538	1	1	0	1	1
Braenderup	intS_1		Prophage integrase IntS	5	12	0	61	100	83.5616	inf	0.000293116	1	0.00566538	1	1	0	1	1
Braenderup	group_4189		hypothetical protein	5	12	0	61	100	83.5616	inf	0.000293116	1	0.00566538	1	1	0	1	1
Braenderup	group_596		hypothetical protein	5	12	0	61	100	83.5616	inf	0.000293116	1	0.00566538	1	1	0	1	1
Braenderup	yfdG_1		Prophage bactoprenol-linked glucose translocase	5	13	0	60	100	82.1918	inf	0.000405853	1	0.00760667	1	1	0	1	1
Braenderup	group_2985		hypothetical protein	5	13	0	60	100	82.1918	inf	0.000405853	1	0.00760667	1	1	0	1	1
Braenderup	group_31		hypothetical protein	5	13	0	60	100	82.1918	inf	0.000405853	1	0.00760667	1	1	0	1	1
Braenderup	group_3332		hypothetical protein	5	13	0	60	100	82.1918	inf	0.000405853	1	0.00760667	1	1	0	1	1
Braenderup	group_3468		hypothetical protein	5	13	0	60	100	82.1918	inf	0.000405853	1	0.00760667	1	1	0	1	1
Braenderup	group_4177		hypothetical protein	5	13	0	60	100	82.1918	inf	0.000405853	1	0.00760667	1	1	0	1	1
Braenderup	group_598		hypothetical protein	5	13	0	60	100	82.1918	inf	0.000405853	1	0.00760667	1	1	0	1	1
Braenderup	group_1162		hypothetical protein	5	14	0	59	100	80.8219	inf	0.000550801	1	0.00998301	1	1	0	1	1
Braenderup	group_1201		hypothetical protein	5	14	0	59	100	80.8219	inf	0.000550801	1	0.00998301	1	1	0	1	1
Braenderup	group_1610		hypothetical protein	5	14	0	59	100	80.8219	inf	0.000550801	1	0.00998301	1	1	0	1	1
Braenderup	group_1612		hypothetical protein	5	14	0	59	100	80.8219	inf	0.000550801	1	0.00998301	1	1	0	1	1
Braenderup	group_2066		hypothetical protein	5	14	0	59	100	80.8219	inf	0.000550801	1	0.00998301	1	1	0	1	1
Braenderup	group_415		hypothetical protein	5	14	0	59	100	80.8219	inf	0.000550801	1	0.00998301	1	1	0	1	1
Braenderup	group_634		hypothetical protein	5	14	0	59	100	80.8219	inf	0.000550801	1	0.00998301	1	1	0	1	1
Braenderup	group_1855	yfcP_1	putative fimbrial-like protein YfcP	5	15	0	58	100	79.4521	inf	0.000734401	1	0.0130244	1	1	0	1	1
Braenderup	group_2984		hypothetical protein	5	15	0	58	100	79.4521	inf	0.000734401	1	0.0130244	1	1	0	1	1
Braenderup	group_3618		hypothetical protein	5	15	0	58	100	79.4521	inf	0.000734401	1	0.0130244	1	1	0	1	1
Braenderup	group_1001		hypothetical protein	5	16	0	57	100	78.0822	inf	0.000963901	1	0.0162778	1	1	0	1	1
Braenderup	group_1140		hypothetical protein	5	16	0	57	100	78.0822	inf	0.000963901	1	0.0162778	1	1	0	1	1
Braenderup	group_1161		IS256 family transposase IS285	5	16	0	57	100	78.0822	inf	0.000963901	1	0.0162778	1	1	0	1	1
Braenderup	group_1196		hypothetical protein	5	16	0	57	100	78.0822	inf	0.000963901	1	0.0162778	1	1	0	1	1
Braenderup	group_1760		hypothetical protein	5	16	0	57	100	78.0822	inf	0.000963901	1	0.0162778	1	1	0	1	1
Braenderup	group_1963		hypothetical protein	5	16	0	57	100	78.0822	inf	0.000963901	1	0.0162778	1	1	0	1	1
Braenderup	group_2523		hypothetical protein	5	16	0	57	100	78.0822	inf	0.000963901	1	0.0162778	1	1	0	1	1
Braenderup	yafP		putative N-acetyltransferase YafP	5	16	0	57	100	78.0822	inf	0.000963901	1	0.0162778	1	1	0	1	1
Braenderup	group_2922		hypothetical protein	5	16	0	57	100	78.0822	inf	0.000963901	1	0.0162778	1	1	0	1	1
Braenderup	group_51		hypothetical protein	5	16	0	57	100	78.0822	inf	0.000963901	1	0.0162778	1	1	0	1	1
Braenderup	group_633		hypothetical protein	5	16	0	57	100	78.0822	inf	0.000963901	1	0.0162778	1	1	0	1	1
Braenderup	group_1067		hypothetical protein	5	17	0	56	100	76.7123	inf	0.0012474	1	0.0207816	1	1	0	1	1
Braenderup	group_128		hypothetical protein	5	17	0	56	100	76.7123	inf	0.0012474	1	0.0207816	1	1	0	1	1
Braenderup	group_388		hypothetical protein	5	17	0	56	100	76.7123	inf	0.0012474	1	0.0207816	1	1	0	1	1
Braenderup	group_4031		hypothetical protein	5	17	0	56	100	76.7123	inf	0.0012474	1	0.0207816	1	1	0	1	1
Braenderup	group_1135	yehD	putative fimbrial-like protein YehD	5	18	0	55	100	75.3425	inf	0.0015939	1	0.0256059	1	1	0	1	1
Braenderup	group_2056		hypothetical protein	5	18	0	55	100	75.3425	inf	0.0015939	1	0.0256059	1	1	0	1	1
Braenderup	group_3271	yehC	putative fimbrial chaperone YehC	5	18	0	55	100	75.3425	inf	0.0015939	1	0.0256059	1	1	0	1	1
Braenderup	group_3272	yehB	Outer membrane usher protein YehB	5	18	0	55	100	75.3425	inf	0.0015939	1	0.0256059	1	1	0	1	1
Braenderup	group_3273	yehA	putative fimbrial-like protein YehA	5	18	0	55	100	75.3425	inf	0.0015939	1	0.0256059	1	1	0	1	1
Braenderup	group_3298		hypothetical protein	5	18	0	55	100	75.3425	inf	0.0015939	1	0.0256059	1	1	0	1	1
Braenderup	group_3302		hypothetical protein	5	18	0	55	100	75.3425	inf	0.0015939	1	0.0256059	1	1	0	1	1
Braenderup	group_3456		hypothetical protein	5	18	0	55	100	75.3425	inf	0.0015939	1	0.0256059	1	1	0	1	1
Braenderup	group_4018		hypothetical protein	5	18	0	55	100	75.3425	inf	0.0015939	1	0.0256059	1	1	0	1	1
Braenderup	group_4035		hypothetical protein	5	18	0	55	100	75.3425	inf	0.0015939	1	0.0256059	1	1	0	1	1
Braenderup	group_974	dppA	Periplasmic dipeptide transport protein	5	18	0	55	100	75.3425	inf	0.0015939	1	0.0256059	1	1	0	1	1
Braenderup	group_1110		hypothetical protein	5	19	0	54	100	73.9726	inf	0.00201335	1	0.031426	1	1	0	1	1
Braenderup	group_2130		hypothetical protein	5	19	0	54	100	73.9726	inf	0.00201335	1	0.031426	1	1	0	1	1
Braenderup	umuC_1		Protein UmuC	5	19	0	54	100	73.9726	inf	0.00201335	1	0.031426	1	1	0	1	1
Braenderup	group_3330		hypothetical protein	5	19	0	54	100	73.9726	inf	0.00201335	1	0.031426	1	1	0	1	1
Braenderup	group_4122		hypothetical protein	5	19	0	54	100	73.9726	inf	0.00201335	1	0.031426	1	1	0	1	1
Braenderup	group_575		hypothetical protein	5	19	0	54	100	73.9726	inf	0.00201335	1	0.031426	1	1	0	1	1
Braenderup	group_631		hypothetical protein	5	19	0	54	100	73.9726	inf	0.00201335	1	0.031426	1	1	0	1	1
Braenderup	group_1847		hypothetical protein	5	20	0	53	100	72.6027	inf	0.00251669	1	0.038793	1	1	0	1	1
Braenderup	group_620		hypothetical protein	5	20	0	53	100	72.6027	inf	0.00251669	1	0.038793	1	1	0	1	1
Braenderup	gltF_2		Protein GltF	5	21	0	52	100	71.2329	inf	0.0031159	1	0.0464381	1	1	0	1	1
Braenderup	hin_2		DNA-invertase hin	5	21	0	52	100	71.2329	inf	0.0031159	1	0.0464381	1	1	0	1	1
Braenderup	group_1611		hypothetical protein	5	21	0	52	100	71.2329	inf	0.0031159	1	0.0464381	1	1	0	1	1
Braenderup	group_1827	yliI	Aldose sugar dehydrogenase YliI	5	21	0	52	100	71.2329	inf	0.0031159	1	0.0464381	1	1	0	1	1
Braenderup	group_1839		hypothetical protein	5	21	0	52	100	71.2329	inf	0.0031159	1	0.0464381	1	1	0	1	1
Braenderup	oadB_3		Oxaloacetate decarboxylase beta chain	5	21	0	52	100	71.2329	inf	0.0031159	1	0.0464381	1	1	0	1	1
Braenderup	group_4017		hypothetical protein	5	21	0	52	100	71.2329	inf	0.0031159	1	0.0464381	1	1	0	1	1
Braenderup	ccmH_1		Cytochrome c-type biogenesis protein CcmH	5	21	0	52	100	71.2329	inf	0.0031159	1	0.0464381	1	1	0	1	1
Braenderup	group_888	sfmD	Outer membrane usher protein SfmD	5	21	0	52	100	71.2329	inf	0.0031159	1	0.0464381	1	1	0	1	1
Braenderup	group_4281		hypothetical protein	2	0	3	73	40	100	inf	0.00333	1	0.04948	1	1	0	1	1
Cerro	intA_2		Prophage integrase IntA	23	0	0	55	100	100	inf	2.89844e-20	1.43415e-16	5.21509e-19	1	1	0	1	1
Cerro	group_1176		hypothetical protein	23	0	0	55	100	100	inf	2.89844e-20	1.43415e-16	5.21509e-19	1	1	0	1	1
Cerro	intS		Prophage integrase IntS	23	0	0	55	100	100	inf	2.89844e-20	1.43415e-16	5.21509e-19	1	1	0	1	1
Cerro	group_1989		hypothetical protein	23	0	0	55	100	100	inf	2.89844e-20	1.43415e-16	5.21509e-19	1	1	0	1	1
Cerro	group_1992		hypothetical protein	23	0	0	55	100	100	inf	2.89844e-20	1.43415e-16	5.21509e-19	1	1	0	1	1
Cerro	group_2002		hypothetical protein	23	0	0	55	100	100	inf	2.89844e-20	1.43415e-16	5.21509e-19	1	1	0	1	1
Cerro	group_2003		hypothetical protein	23	0	0	55	100	100	inf	2.89844e-20	1.43415e-16	5.21509e-19	1	1	0	1	1
Cerro	eptC		Phosphoethanolamine transferase EptC	23	0	0	55	100	100	inf	2.89844e-20	1.43415e-16	5.21509e-19	1	1	0	1	1
Cerro	group_2006		hypothetical protein	23	0	0	55	100	100	inf	2.89844e-20	1.43415e-16	5.21509e-19	1	1	0	1	1
Cerro	group_2010		hypothetical protein	23	0	0	55	100	100	inf	2.89844e-20	1.43415e-16	5.21509e-19	1	1	0	1	1
Cerro	group_2021	sspH2	E3 ubiquitin-protein ligase SspH2	23	0	0	55	100	100	inf	2.89844e-20	1.43415e-16	5.21509e-19	1	1	0	1	1
Cerro	group_24		hypothetical protein	23	0	0	55	100	100	inf	2.89844e-20	1.43415e-16	5.21509e-19	1	1	0	1	1
Cerro	group_267		hypothetical protein	23	0	0	55	100	100	inf	2.89844e-20	1.43415e-16	5.21509e-19	1	1	0	1	1
Cerro	group_34		hypothetical protein	23	0	0	55	100	100	inf	2.89844e-20	1.43415e-16	5.21509e-19	1	1	0	1	1
Cerro	group_3664		hypothetical protein	23	0	0	55	100	100	inf	2.89844e-20	1.43415e-16	5.21509e-19	1	1	0	1	1
Cerro	group_3665		hypothetical protein	23	0	0	55	100	100	inf	2.89844e-20	1.43415e-16	5.21509e-19	1	1	0	1	1
Cerro	lst		CMP-N-acetylneuraminate:beta-galactoside alpha-2,3-sialyltransferase	23	0	0	55	100	100	inf	2.89844e-20	1.43415e-16	5.21509e-19	1	1	0	1	1
Cerro	group_3667		hypothetical protein	23	0	0	55	100	100	inf	2.89844e-20	1.43415e-16	5.21509e-19	1	1	0	1	1
Cerro	leuE_1		Leucine efflux protein	23	0	0	55	100	100	inf	2.89844e-20	1.43415e-16	5.21509e-19	1	1	0	1	1
Cerro	rpoD_1		RNA polymerase sigma factor RpoD	23	0	0	55	100	100	inf	2.89844e-20	1.43415e-16	5.21509e-19	1	1	0	1	1
Cerro	group_3674		hypothetical protein	23	0	0	55	100	100	inf	2.89844e-20	1.43415e-16	5.21509e-19	1	1	0	1	1
Cerro	group_3675		hypothetical protein	23	0	0	55	100	100	inf	2.89844e-20	1.43415e-16	5.21509e-19	1	1	0	1	1
Cerro	group_3676		hypothetical protein	23	0	0	55	100	100	inf	2.89844e-20	1.43415e-16	5.21509e-19	1	1	0	1	1
Cerro	group_3677		hypothetical protein	23	0	0	55	100	100	inf	2.89844e-20	1.43415e-16	5.21509e-19	1	1	0	1	1
Cerro	group_3678		hypothetical protein	23	0	0	55	100	100	inf	2.89844e-20	1.43415e-16	5.21509e-19	1	1	0	1	1
Cerro	group_3679		hypothetical protein	23	0	0	55	100	100	inf	2.89844e-20	1.43415e-16	5.21509e-19	1	1	0	1	1
Cerro	group_3680		hypothetical protein	23	0	0	55	100	100	inf	2.89844e-20	1.43415e-16	5.21509e-19	1	1	0	1	1
Cerro	group_3682		hypothetical protein	23	0	0	55	100	100	inf	2.89844e-20	1.43415e-16	5.21509e-19	1	1	0	1	1
Cerro	group_3683		hypothetical protein	23	0	0	55	100	100	inf	2.89844e-20	1.43415e-16	5.21509e-19	1	1	0	1	1
Cerro	group_3684		hypothetical protein	23	0	0	55	100	100	inf	2.89844e-20	1.43415e-16	5.21509e-19	1	1	0	1	1
Cerro	group_3685		hypothetical protein	23	0	0	55	100	100	inf	2.89844e-20	1.43415e-16	5.21509e-19	1	1	0	1	1
Cerro	group_3686		hypothetical protein	23	0	0	55	100	100	inf	2.89844e-20	1.43415e-16	5.21509e-19	1	1	0	1	1
Cerro	group_3687		hypothetical protein	23	0	0	55	100	100	inf	2.89844e-20	1.43415e-16	5.21509e-19	1	1	0	1	1
Cerro	group_3690		hypothetical protein	23	0	0	55	100	100	inf	2.89844e-20	1.43415e-16	5.21509e-19	1	1	0	1	1
Cerro	group_3692		hypothetical protein	23	0	0	55	100	100	inf	2.89844e-20	1.43415e-16	5.21509e-19	1	1	0	1	1
Cerro	group_3693		hypothetical protein	23	0	0	55	100	100	inf	2.89844e-20	1.43415e-16	5.21509e-19	1	1	0	1	1
Cerro	group_3694		hypothetical protein	23	0	0	55	100	100	inf	2.89844e-20	1.43415e-16	5.21509e-19	1	1	0	1	1
Cerro	group_3695		hypothetical protein	23	0	0	55	100	100	inf	2.89844e-20	1.43415e-16	5.21509e-19	1	1	0	1	1
Cerro	group_3696		hypothetical protein	23	0	0	55	100	100	inf	2.89844e-20	1.43415e-16	5.21509e-19	1	1	0	1	1
Cerro	group_3697		hypothetical protein	23	0	0	55	100	100	inf	2.89844e-20	1.43415e-16	5.21509e-19	1	1	0	1	1
Cerro	ydiO		putative BsuMI modification methylase subunit YdiO	23	0	0	55	100	100	inf	2.89844e-20	1.43415e-16	5.21509e-19	1	1	0	1	1
Cerro	group_3699		hypothetical protein	23	0	0	55	100	100	inf	2.89844e-20	1.43415e-16	5.21509e-19	1	1	0	1	1
Cerro	group_3700		IS30 family transposase ISCfr4	23	0	0	55	100	100	inf	2.89844e-20	1.43415e-16	5.21509e-19	1	1	0	1	1
Cerro	group_3701		hypothetical protein	23	0	0	55	100	100	inf	2.89844e-20	1.43415e-16	5.21509e-19	1	1	0	1	1
Cerro	group_3702	pipB2	Secreted effector protein PipB2	23	0	0	55	100	100	inf	2.89844e-20	1.43415e-16	5.21509e-19	1	1	0	1	1
Cerro	group_3705		hypothetical protein	23	0	0	55	100	100	inf	2.89844e-20	1.43415e-16	5.21509e-19	1	1	0	1	1
Cerro	group_3706	gatA	PTS system galactitol-specific EIIA component	23	0	0	55	100	100	inf	2.89844e-20	1.43415e-16	5.21509e-19	1	1	0	1	1
Cerro	group_3707		hypothetical protein	23	0	0	55	100	100	inf	2.89844e-20	1.43415e-16	5.21509e-19	1	1	0	1	1
Cerro	ssb_1		Single-stranded DNA-binding protein	23	0	0	55	100	100	inf	2.89844e-20	1.43415e-16	5.21509e-19	1	1	0	1	1
Cerro	group_3709		hypothetical protein	23	0	0	55	100	100	inf	2.89844e-20	1.43415e-16	5.21509e-19	1	1	0	1	1
Cerro	group_3710		hypothetical protein	23	0	0	55	100	100	inf	2.89844e-20	1.43415e-16	5.21509e-19	1	1	0	1	1
Cerro	group_3711		hypothetical protein	23	0	0	55	100	100	inf	2.89844e-20	1.43415e-16	5.21509e-19	1	1	0	1	1
Cerro	group_3712		hypothetical protein	23	0	0	55	100	100	inf	2.89844e-20	1.43415e-16	5.21509e-19	1	1	0	1	1
Cerro	group_3713		hypothetical protein	23	0	0	55	100	100	inf	2.89844e-20	1.43415e-16	5.21509e-19	1	1	0	1	1
Cerro	group_3714		hypothetical protein	23	0	0	55	100	100	inf	2.89844e-20	1.43415e-16	5.21509e-19	1	1	0	1	1
Cerro	group_3715		hypothetical protein	23	0	0	55	100	100	inf	2.89844e-20	1.43415e-16	5.21509e-19	1	1	0	1	1
Cerro	group_3716		hypothetical protein	23	0	0	55	100	100	inf	2.89844e-20	1.43415e-16	5.21509e-19	1	1	0	1	1
Cerro	group_3717		hypothetical protein	23	0	0	55	100	100	inf	2.89844e-20	1.43415e-16	5.21509e-19	1	1	0	1	1
Cerro	intQ		Putative defective protein IntQ	23	0	0	55	100	100	inf	2.89844e-20	1.43415e-16	5.21509e-19	1	1	0	1	1
Cerro	group_3719		hypothetical protein	23	0	0	55	100	100	inf	2.89844e-20	1.43415e-16	5.21509e-19	1	1	0	1	1
Cerro	group_3720		hypothetical protein	23	0	0	55	100	100	inf	2.89844e-20	1.43415e-16	5.21509e-19	1	1	0	1	1
Cerro	group_3721		hypothetical protein	23	0	0	55	100	100	inf	2.89844e-20	1.43415e-16	5.21509e-19	1	1	0	1	1
Cerro	group_3722		hypothetical protein	23	0	0	55	100	100	inf	2.89844e-20	1.43415e-16	5.21509e-19	1	1	0	1	1
Cerro	group_3723		hypothetical protein	23	0	0	55	100	100	inf	2.89844e-20	1.43415e-16	5.21509e-19	1	1	0	1	1
Cerro	group_3724		hypothetical protein	23	0	0	55	100	100	inf	2.89844e-20	1.43415e-16	5.21509e-19	1	1	0	1	1
Cerro	group_3726	sopD2	Secreted effector protein sopD2	23	0	0	55	100	100	inf	2.89844e-20	1.43415e-16	5.21509e-19	1	1	0	1	1
Cerro	group_3727	yehD	putative fimbrial-like protein YehD	23	0	0	55	100	100	inf	2.89844e-20	1.43415e-16	5.21509e-19	1	1	0	1	1
Cerro	group_3728	yehC	putative fimbrial chaperone YehC	23	0	0	55	100	100	inf	2.89844e-20	1.43415e-16	5.21509e-19	1	1	0	1	1
Cerro	group_3729		hypothetical protein	23	0	0	55	100	100	inf	2.89844e-20	1.43415e-16	5.21509e-19	1	1	0	1	1
Cerro	gnu		N-acetyl-alpha-D-glucosaminyl-diphospho-ditrans,octacis-undecaprenol 4-epimerase	23	0	0	55	100	100	inf	2.89844e-20	1.43415e-16	5.21509e-19	1	1	0	1	1
Cerro	group_3732		hypothetical protein	23	0	0	55	100	100	inf	2.89844e-20	1.43415e-16	5.21509e-19	1	1	0	1	1
Cerro	group_3733		hypothetical protein	23	0	0	55	100	100	inf	2.89844e-20	1.43415e-16	5.21509e-19	1	1	0	1	1
Cerro	group_3734		hypothetical protein	23	0	0	55	100	100	inf	2.89844e-20	1.43415e-16	5.21509e-19	1	1	0	1	1
Cerro	group_3735		hypothetical protein	23	0	0	55	100	100	inf	2.89844e-20	1.43415e-16	5.21509e-19	1	1	0	1	1
Cerro	group_3736		hypothetical protein	23	0	0	55	100	100	inf	2.89844e-20	1.43415e-16	5.21509e-19	1	1	0	1	1
Cerro	group_3737		hypothetical protein	23	0	0	55	100	100	inf	2.89844e-20	1.43415e-16	5.21509e-19	1	1	0	1	1
Cerro	group_3738	steC	Secreted effector kinase SteC	23	0	0	55	100	100	inf	2.89844e-20	1.43415e-16	5.21509e-19	1	1	0	1	1
Cerro	sifA_1		Secreted effector protein SifA	23	0	0	55	100	100	inf	2.89844e-20	1.43415e-16	5.21509e-19	1	1	0	1	1
Cerro	group_3743		hypothetical protein	23	0	0	55	100	100	inf	2.89844e-20	1.43415e-16	5.21509e-19	1	1	0	1	1
Cerro	group_3744		IS630 family transposase ISEc33	23	0	0	55	100	100	inf	2.89844e-20	1.43415e-16	5.21509e-19	1	1	0	1	1
Cerro	group_3745		hypothetical protein	23	0	0	55	100	100	inf	2.89844e-20	1.43415e-16	5.21509e-19	1	1	0	1	1
Cerro	group_3746		hypothetical protein	23	0	0	55	100	100	inf	2.89844e-20	1.43415e-16	5.21509e-19	1	1	0	1	1
Cerro	group_3747		hypothetical protein	23	0	0	55	100	100	inf	2.89844e-20	1.43415e-16	5.21509e-19	1	1	0	1	1
Cerro	group_3748		hypothetical protein	23	0	0	55	100	100	inf	2.89844e-20	1.43415e-16	5.21509e-19	1	1	0	1	1
Cerro	higB2		Putative toxin HigB2	23	0	0	55	100	100	inf	2.89844e-20	1.43415e-16	5.21509e-19	1	1	0	1	1
Cerro	group_3750		hypothetical protein	23	0	0	55	100	100	inf	2.89844e-20	1.43415e-16	5.21509e-19	1	1	0	1	1
Cerro	group_3751		hypothetical protein	23	0	0	55	100	100	inf	2.89844e-20	1.43415e-16	5.21509e-19	1	1	0	1	1
Cerro	group_3753		hypothetical protein	23	0	0	55	100	100	inf	2.89844e-20	1.43415e-16	5.21509e-19	1	1	0	1	1
Cerro	group_3754		IS481 family transposase ISErsp1	23	0	0	55	100	100	inf	2.89844e-20	1.43415e-16	5.21509e-19	1	1	0	1	1
Cerro	group_3755		IS481 family transposase ISErsp1	23	0	0	55	100	100	inf	2.89844e-20	1.43415e-16	5.21509e-19	1	1	0	1	1
Cerro	sspH1		E3 ubiquitin-protein ligase SspH1	23	0	0	55	100	100	inf	2.89844e-20	1.43415e-16	5.21509e-19	1	1	0	1	1
Cerro	yedK_1		SOS response-associated protein YedK	23	0	0	55	100	100	inf	2.89844e-20	1.43415e-16	5.21509e-19	1	1	0	1	1
Cerro	group_3758		hypothetical protein	23	0	0	55	100	100	inf	2.89844e-20	1.43415e-16	5.21509e-19	1	1	0	1	1
Cerro	rcbA_1		Double-strand break reduction protein	23	0	0	55	100	100	inf	2.89844e-20	1.43415e-16	5.21509e-19	1	1	0	1	1
Cerro	recT_1		Protein RecT	23	0	0	55	100	100	inf	2.89844e-20	1.43415e-16	5.21509e-19	1	1	0	1	1
Cerro	recE_1		Exodeoxyribonuclease 8	23	0	0	55	100	100	inf	2.89844e-20	1.43415e-16	5.21509e-19	1	1	0	1	1
Cerro	group_3762		hypothetical protein	23	0	0	55	100	100	inf	2.89844e-20	1.43415e-16	5.21509e-19	1	1	0	1	1
Cerro	group_3763		hypothetical protein	23	0	0	55	100	100	inf	2.89844e-20	1.43415e-16	5.21509e-19	1	1	0	1	1
Cerro	kilR		Killing protein KilR	23	0	0	55	100	100	inf	2.89844e-20	1.43415e-16	5.21509e-19	1	1	0	1	1
Cerro	group_3765		hypothetical protein	23	0	0	55	100	100	inf	2.89844e-20	1.43415e-16	5.21509e-19	1	1	0	1	1
Cerro	group_3766		hypothetical protein	23	0	0	55	100	100	inf	2.89844e-20	1.43415e-16	5.21509e-19	1	1	0	1	1
Cerro	group_3767		hypothetical protein	23	0	0	55	100	100	inf	2.89844e-20	1.43415e-16	5.21509e-19	1	1	0	1	1
Cerro	group_3768		hypothetical protein	23	0	0	55	100	100	inf	2.89844e-20	1.43415e-16	5.21509e-19	1	1	0	1	1
Cerro	group_3769		hypothetical protein	23	0	0	55	100	100	inf	2.89844e-20	1.43415e-16	5.21509e-19	1	1	0	1	1
Cerro	group_3770		hypothetical protein	23	0	0	55	100	100	inf	2.89844e-20	1.43415e-16	5.21509e-19	1	1	0	1	1
Cerro	dnaC_2		DNA replication protein DnaC	23	0	0	55	100	100	inf	2.89844e-20	1.43415e-16	5.21509e-19	1	1	0	1	1
Cerro	group_3772		hypothetical protein	23	0	0	55	100	100	inf	2.89844e-20	1.43415e-16	5.21509e-19	1	1	0	1	1
Cerro	group_3773		hypothetical protein	23	0	0	55	100	100	inf	2.89844e-20	1.43415e-16	5.21509e-19	1	1	0	1	1
Cerro	group_3774		hypothetical protein	23	0	0	55	100	100	inf	2.89844e-20	1.43415e-16	5.21509e-19	1	1	0	1	1
Cerro	group_3775		hypothetical protein	23	0	0	55	100	100	inf	2.89844e-20	1.43415e-16	5.21509e-19	1	1	0	1	1
Cerro	group_3776		hypothetical protein	23	0	0	55	100	100	inf	2.89844e-20	1.43415e-16	5.21509e-19	1	1	0	1	1
Cerro	group_3777		hypothetical protein	23	0	0	55	100	100	inf	2.89844e-20	1.43415e-16	5.21509e-19	1	1	0	1	1
Cerro	group_3778		hypothetical protein	23	0	0	55	100	100	inf	2.89844e-20	1.43415e-16	5.21509e-19	1	1	0	1	1
Cerro	group_3779		hypothetical protein	23	0	0	55	100	100	inf	2.89844e-20	1.43415e-16	5.21509e-19	1	1	0	1	1
Cerro	group_3780		hypothetical protein	23	0	0	55	100	100	inf	2.89844e-20	1.43415e-16	5.21509e-19	1	1	0	1	1
Cerro	ybcO		Putative nuclease YbcO	23	0	0	55	100	100	inf	2.89844e-20	1.43415e-16	5.21509e-19	1	1	0	1	1
Cerro	group_3782		hypothetical protein	23	0	0	55	100	100	inf	2.89844e-20	1.43415e-16	5.21509e-19	1	1	0	1	1
Cerro	group_3783		hypothetical protein	23	0	0	55	100	100	inf	2.89844e-20	1.43415e-16	5.21509e-19	1	1	0	1	1
Cerro	hicB		Antitoxin HicB	23	0	0	55	100	100	inf	2.89844e-20	1.43415e-16	5.21509e-19	1	1	0	1	1
Cerro	group_3786		hypothetical protein	23	0	0	55	100	100	inf	2.89844e-20	1.43415e-16	5.21509e-19	1	1	0	1	1
Cerro	group_3787		hypothetical protein	23	0	0	55	100	100	inf	2.89844e-20	1.43415e-16	5.21509e-19	1	1	0	1	1
Cerro	group_3788		hypothetical protein	23	0	0	55	100	100	inf	2.89844e-20	1.43415e-16	5.21509e-19	1	1	0	1	1
Cerro	group_3789		hypothetical protein	23	0	0	55	100	100	inf	2.89844e-20	1.43415e-16	5.21509e-19	1	1	0	1	1
Cerro	group_3790		hypothetical protein	23	0	0	55	100	100	inf	2.89844e-20	1.43415e-16	5.21509e-19	1	1	0	1	1
Cerro	group_3791		hypothetical protein	23	0	0	55	100	100	inf	2.89844e-20	1.43415e-16	5.21509e-19	1	1	0	1	1
Cerro	group_3792		hypothetical protein	23	0	0	55	100	100	inf	2.89844e-20	1.43415e-16	5.21509e-19	1	1	0	1	1
Cerro	group_3793		hypothetical protein	23	0	0	55	100	100	inf	2.89844e-20	1.43415e-16	5.21509e-19	1	1	0	1	1
Cerro	group_3794		hypothetical protein	23	0	0	55	100	100	inf	2.89844e-20	1.43415e-16	5.21509e-19	1	1	0	1	1
Cerro	group_3795		hypothetical protein	23	0	0	55	100	100	inf	2.89844e-20	1.43415e-16	5.21509e-19	1	1	0	1	1
Cerro	group_3796		hypothetical protein	23	0	0	55	100	100	inf	2.89844e-20	1.43415e-16	5.21509e-19	1	1	0	1	1
Cerro	group_3797		hypothetical protein	23	0	0	55	100	100	inf	2.89844e-20	1.43415e-16	5.21509e-19	1	1	0	1	1
Cerro	group_3798		hypothetical protein	23	0	0	55	100	100	inf	2.89844e-20	1.43415e-16	5.21509e-19	1	1	0	1	1
Cerro	group_3799		hypothetical protein	23	0	0	55	100	100	inf	2.89844e-20	1.43415e-16	5.21509e-19	1	1	0	1	1
Cerro	group_3800		hypothetical protein	23	0	0	55	100	100	inf	2.89844e-20	1.43415e-16	5.21509e-19	1	1	0	1	1
Cerro	group_3801		hypothetical protein	23	0	0	55	100	100	inf	2.89844e-20	1.43415e-16	5.21509e-19	1	1	0	1	1
Cerro	group_3802		hypothetical protein	23	0	0	55	100	100	inf	2.89844e-20	1.43415e-16	5.21509e-19	1	1	0	1	1
Cerro	group_3803		hypothetical protein	23	0	0	55	100	100	inf	2.89844e-20	1.43415e-16	5.21509e-19	1	1	0	1	1
Cerro	group_3804		hypothetical protein	23	0	0	55	100	100	inf	2.89844e-20	1.43415e-16	5.21509e-19	1	1	0	1	1
Cerro	group_3805		hypothetical protein	23	0	0	55	100	100	inf	2.89844e-20	1.43415e-16	5.21509e-19	1	1	0	1	1
Cerro	group_3806		hypothetical protein	23	0	0	55	100	100	inf	2.89844e-20	1.43415e-16	5.21509e-19	1	1	0	1	1
Cerro	group_3807		hypothetical protein	23	0	0	55	100	100	inf	2.89844e-20	1.43415e-16	5.21509e-19	1	1	0	1	1
Cerro	group_3808		hypothetical protein	23	0	0	55	100	100	inf	2.89844e-20	1.43415e-16	5.21509e-19	1	1	0	1	1
Cerro	group_3809		hypothetical protein	23	0	0	55	100	100	inf	2.89844e-20	1.43415e-16	5.21509e-19	1	1	0	1	1
Cerro	ymdB_2		O-acetyl-ADP-ribose deacetylase	23	0	0	55	100	100	inf	2.89844e-20	1.43415e-16	5.21509e-19	1	1	0	1	1
Cerro	tfaE_2		Prophage tail fiber assembly protein TfaE	23	0	0	55	100	100	inf	2.89844e-20	1.43415e-16	5.21509e-19	1	1	0	1	1
Cerro	htrL		Protein HtrL	23	0	0	55	100	100	inf	2.89844e-20	1.43415e-16	5.21509e-19	1	1	0	1	1
Cerro	group_3813		hypothetical protein	23	0	0	55	100	100	inf	2.89844e-20	1.43415e-16	5.21509e-19	1	1	0	1	1
Cerro	group_3814		hypothetical protein	23	0	0	55	100	100	inf	2.89844e-20	1.43415e-16	5.21509e-19	1	1	0	1	1
Cerro	group_3815	yfcP_2	putative fimbrial-like protein YfcP	23	0	0	55	100	100	inf	2.89844e-20	1.43415e-16	5.21509e-19	1	1	0	1	1
Cerro	group_3816		hypothetical protein	23	0	0	55	100	100	inf	2.89844e-20	1.43415e-16	5.21509e-19	1	1	0	1	1
Cerro	group_3817		hypothetical protein	23	0	0	55	100	100	inf	2.89844e-20	1.43415e-16	5.21509e-19	1	1	0	1	1
Cerro	group_3818		hypothetical protein	23	0	0	55	100	100	inf	2.89844e-20	1.43415e-16	5.21509e-19	1	1	0	1	1
Cerro	fliC		Flagellin	23	0	0	55	100	100	inf	2.89844e-20	1.43415e-16	5.21509e-19	1	1	0	1	1
Cerro	group_3820	fliD	Flagellar hook-associated protein 2	23	0	0	55	100	100	inf	2.89844e-20	1.43415e-16	5.21509e-19	1	1	0	1	1
Cerro	group_3821		hypothetical protein	23	0	0	55	100	100	inf	2.89844e-20	1.43415e-16	5.21509e-19	1	1	0	1	1
Cerro	group_3824		hypothetical protein	23	0	0	55	100	100	inf	2.89844e-20	1.43415e-16	5.21509e-19	1	1	0	1	1
Cerro	group_3825		hypothetical protein	23	0	0	55	100	100	inf	2.89844e-20	1.43415e-16	5.21509e-19	1	1	0	1	1
Cerro	group_3826		hypothetical protein	23	0	0	55	100	100	inf	2.89844e-20	1.43415e-16	5.21509e-19	1	1	0	1	1
Cerro	group_3827		hypothetical protein	23	0	0	55	100	100	inf	2.89844e-20	1.43415e-16	5.21509e-19	1	1	0	1	1
Cerro	group_3828		hypothetical protein	23	0	0	55	100	100	inf	2.89844e-20	1.43415e-16	5.21509e-19	1	1	0	1	1
Cerro	group_3829		hypothetical protein	23	0	0	55	100	100	inf	2.89844e-20	1.43415e-16	5.21509e-19	1	1	0	1	1
Cerro	group_3830		hypothetical protein	23	0	0	55	100	100	inf	2.89844e-20	1.43415e-16	5.21509e-19	1	1	0	1	1
Cerro	group_3831		hypothetical protein	23	0	0	55	100	100	inf	2.89844e-20	1.43415e-16	5.21509e-19	1	1	0	1	1
Cerro	group_3832		hypothetical protein	23	0	0	55	100	100	inf	2.89844e-20	1.43415e-16	5.21509e-19	1	1	0	1	1
Cerro	group_3833		hypothetical protein	23	0	0	55	100	100	inf	2.89844e-20	1.43415e-16	5.21509e-19	1	1	0	1	1
Cerro	group_3834		hypothetical protein	23	0	0	55	100	100	inf	2.89844e-20	1.43415e-16	5.21509e-19	1	1	0	1	1
Cerro	group_3837		hypothetical protein	23	0	0	55	100	100	inf	2.89844e-20	1.43415e-16	5.21509e-19	1	1	0	1	1
Cerro	group_3844		hypothetical protein	23	0	0	55	100	100	inf	2.89844e-20	1.43415e-16	5.21509e-19	1	1	0	1	1
Cerro	group_3845		hypothetical protein	23	0	0	55	100	100	inf	2.89844e-20	1.43415e-16	5.21509e-19	1	1	0	1	1
Cerro	pndA		Protein PndA	23	0	0	55	100	100	inf	2.89844e-20	1.43415e-16	5.21509e-19	1	1	0	1	1
Cerro	group_3847		hypothetical protein	23	0	0	55	100	100	inf	2.89844e-20	1.43415e-16	5.21509e-19	1	1	0	1	1
Cerro	group_3848		hypothetical protein	23	0	0	55	100	100	inf	2.89844e-20	1.43415e-16	5.21509e-19	1	1	0	1	1
Cerro	group_3849		hypothetical protein	23	0	0	55	100	100	inf	2.89844e-20	1.43415e-16	5.21509e-19	1	1	0	1	1
Cerro	group_3850		hypothetical protein	23	0	0	55	100	100	inf	2.89844e-20	1.43415e-16	5.21509e-19	1	1	0	1	1
Cerro	group_3851		hypothetical protein	23	0	0	55	100	100	inf	2.89844e-20	1.43415e-16	5.21509e-19	1	1	0	1	1
Cerro	group_3852		hypothetical protein	23	0	0	55	100	100	inf	2.89844e-20	1.43415e-16	5.21509e-19	1	1	0	1	1
Cerro	group_3854		hypothetical protein	23	0	0	55	100	100	inf	2.89844e-20	1.43415e-16	5.21509e-19	1	1	0	1	1
Cerro	group_3855		hypothetical protein	23	0	0	55	100	100	inf	2.89844e-20	1.43415e-16	5.21509e-19	1	1	0	1	1
Cerro	group_3856		hypothetical protein	23	0	0	55	100	100	inf	2.89844e-20	1.43415e-16	5.21509e-19	1	1	0	1	1
Cerro	group_3857		ISNCY family transposase ISRor2	23	0	0	55	100	100	inf	2.89844e-20	1.43415e-16	5.21509e-19	1	1	0	1	1
Cerro	group_3858		hypothetical protein	23	0	0	55	100	100	inf	2.89844e-20	1.43415e-16	5.21509e-19	1	1	0	1	1
Cerro	group_3859		hypothetical protein	23	0	0	55	100	100	inf	2.89844e-20	1.43415e-16	5.21509e-19	1	1	0	1	1
Cerro	group_3860		hypothetical protein	23	0	0	55	100	100	inf	2.89844e-20	1.43415e-16	5.21509e-19	1	1	0	1	1
Cerro	group_3861		hypothetical protein	23	0	0	55	100	100	inf	2.89844e-20	1.43415e-16	5.21509e-19	1	1	0	1	1
Cerro	klcA		Antirestriction protein KlcA	23	0	0	55	100	100	inf	2.89844e-20	1.43415e-16	5.21509e-19	1	1	0	1	1
Cerro	group_3863		hypothetical protein	23	0	0	55	100	100	inf	2.89844e-20	1.43415e-16	5.21509e-19	1	1	0	1	1
Cerro	group_3864		hypothetical protein	23	0	0	55	100	100	inf	2.89844e-20	1.43415e-16	5.21509e-19	1	1	0	1	1
Cerro	group_3865		hypothetical protein	23	0	0	55	100	100	inf	2.89844e-20	1.43415e-16	5.21509e-19	1	1	0	1	1
Cerro	yhdJ_1		DNA adenine methyltransferase YhdJ	23	0	0	55	100	100	inf	2.89844e-20	1.43415e-16	5.21509e-19	1	1	0	1	1
Cerro	group_3867		hypothetical protein	23	0	0	55	100	100	inf	2.89844e-20	1.43415e-16	5.21509e-19	1	1	0	1	1
Cerro	group_3868		hypothetical protein	23	0	0	55	100	100	inf	2.89844e-20	1.43415e-16	5.21509e-19	1	1	0	1	1
Cerro	group_3869	umuD	Protein UmuD	23	0	0	55	100	100	inf	2.89844e-20	1.43415e-16	5.21509e-19	1	1	0	1	1
Cerro	group_3870	umuC	Protein UmuC	23	0	0	55	100	100	inf	2.89844e-20	1.43415e-16	5.21509e-19	1	1	0	1	1
Cerro	group_3871		hypothetical protein	23	0	0	55	100	100	inf	2.89844e-20	1.43415e-16	5.21509e-19	1	1	0	1	1
Cerro	parM		Plasmid segregation protein ParM	23	0	0	55	100	100	inf	2.89844e-20	1.43415e-16	5.21509e-19	1	1	0	1	1
Cerro	group_3873		hypothetical protein	23	0	0	55	100	100	inf	2.89844e-20	1.43415e-16	5.21509e-19	1	1	0	1	1
Cerro	group_3874		hypothetical protein	23	0	0	55	100	100	inf	2.89844e-20	1.43415e-16	5.21509e-19	1	1	0	1	1
Cerro	group_3875	xerC_2	Tyrosine recombinase XerC	23	0	0	55	100	100	inf	2.89844e-20	1.43415e-16	5.21509e-19	1	1	0	1	1
Cerro	group_3876		hypothetical protein	23	0	0	55	100	100	inf	2.89844e-20	1.43415e-16	5.21509e-19	1	1	0	1	1
Cerro	group_3877		hypothetical protein	23	0	0	55	100	100	inf	2.89844e-20	1.43415e-16	5.21509e-19	1	1	0	1	1
Cerro	group_3878		hypothetical protein	23	0	0	55	100	100	inf	2.89844e-20	1.43415e-16	5.21509e-19	1	1	0	1	1
Cerro	group_3879		hypothetical protein	23	0	0	55	100	100	inf	2.89844e-20	1.43415e-16	5.21509e-19	1	1	0	1	1
Cerro	group_3880		hypothetical protein	23	0	0	55	100	100	inf	2.89844e-20	1.43415e-16	5.21509e-19	1	1	0	1	1
Cerro	group_3881		hypothetical protein	23	0	0	55	100	100	inf	2.89844e-20	1.43415e-16	5.21509e-19	1	1	0	1	1
Cerro	ompT		Protease 7	23	0	0	55	100	100	inf	2.89844e-20	1.43415e-16	5.21509e-19	1	1	0	1	1
Cerro	macA_2		Macrolide export protein MacA	23	0	0	55	100	100	inf	2.89844e-20	1.43415e-16	5.21509e-19	1	1	0	1	1
Cerro	macB_2		Macrolide export ATP-binding/permease protein MacB	23	0	0	55	100	100	inf	2.89844e-20	1.43415e-16	5.21509e-19	1	1	0	1	1
Cerro	tdeA		Toxin and drug export protein A	23	0	0	55	100	100	inf	2.89844e-20	1.43415e-16	5.21509e-19	1	1	0	1	1
Cerro	tsr_3		Methyl-accepting chemotaxis protein I	23	0	0	55	100	100	inf	2.89844e-20	1.43415e-16	5.21509e-19	1	1	0	1	1
Cerro	group_3887		hypothetical protein	23	0	0	55	100	100	inf	2.89844e-20	1.43415e-16	5.21509e-19	1	1	0	1	1
Cerro	dinG_2		3'-5' exonuclease DinG	23	0	0	55	100	100	inf	2.89844e-20	1.43415e-16	5.21509e-19	1	1	0	1	1
Cerro	relE2		Toxin RelE2	23	0	0	55	100	100	inf	2.89844e-20	1.43415e-16	5.21509e-19	1	1	0	1	1
Cerro	group_3890		hypothetical protein	23	0	0	55	100	100	inf	2.89844e-20	1.43415e-16	5.21509e-19	1	1	0	1	1
Cerro	repA		Replication initiation protein	23	0	0	55	100	100	inf	2.89844e-20	1.43415e-16	5.21509e-19	1	1	0	1	1
Cerro	group_3892		hypothetical protein	23	0	0	55	100	100	inf	2.89844e-20	1.43415e-16	5.21509e-19	1	1	0	1	1
Cerro	rfaH_2		Transcription antitermination protein RfaH	23	0	0	55	100	100	inf	2.89844e-20	1.43415e-16	5.21509e-19	1	1	0	1	1
Cerro	group_3894		hypothetical protein	23	0	0	55	100	100	inf	2.89844e-20	1.43415e-16	5.21509e-19	1	1	0	1	1
Cerro	group_3895		hypothetical protein	23	0	0	55	100	100	inf	2.89844e-20	1.43415e-16	5.21509e-19	1	1	0	1	1
Cerro	group_3896		hypothetical protein	23	0	0	55	100	100	inf	2.89844e-20	1.43415e-16	5.21509e-19	1	1	0	1	1
Cerro	group_3897		hypothetical protein	23	0	0	55	100	100	inf	2.89844e-20	1.43415e-16	5.21509e-19	1	1	0	1	1
Cerro	group_3898		hypothetical protein	23	0	0	55	100	100	inf	2.89844e-20	1.43415e-16	5.21509e-19	1	1	0	1	1
Cerro	group_3899		hypothetical protein	23	0	0	55	100	100	inf	2.89844e-20	1.43415e-16	5.21509e-19	1	1	0	1	1
Cerro	group_3900		hypothetical protein	23	0	0	55	100	100	inf	2.89844e-20	1.43415e-16	5.21509e-19	1	1	0	1	1
Cerro	group_3901		hypothetical protein	23	0	0	55	100	100	inf	2.89844e-20	1.43415e-16	5.21509e-19	1	1	0	1	1
Cerro	group_3902		hypothetical protein	23	0	0	55	100	100	inf	2.89844e-20	1.43415e-16	5.21509e-19	1	1	0	1	1
Cerro	group_3949		hypothetical protein	23	0	0	55	100	100	inf	2.89844e-20	1.43415e-16	5.21509e-19	1	1	0	1	1
Cerro	group_3950	narX	Nitrate/nitrite sensor protein NarX	23	0	0	55	100	100	inf	2.89844e-20	1.43415e-16	5.21509e-19	1	1	0	1	1
Cerro	group_3951		hypothetical protein	23	0	0	55	100	100	inf	2.89844e-20	1.43415e-16	5.21509e-19	1	1	0	1	1
Cerro	group_3952		hypothetical protein	23	0	0	55	100	100	inf	2.89844e-20	1.43415e-16	5.21509e-19	1	1	0	1	1
Cerro	group_3955		hypothetical protein	23	0	0	55	100	100	inf	2.89844e-20	1.43415e-16	5.21509e-19	1	1	0	1	1
Cerro	group_3957		hypothetical protein	23	0	0	55	100	100	inf	2.89844e-20	1.43415e-16	5.21509e-19	1	1	0	1	1
Cerro	group_3958		hypothetical protein	23	0	0	55	100	100	inf	2.89844e-20	1.43415e-16	5.21509e-19	1	1	0	1	1
Cerro	group_3959		hypothetical protein	23	0	0	55	100	100	inf	2.89844e-20	1.43415e-16	5.21509e-19	1	1	0	1	1
Cerro	group_3960	vgrG1	Actin cross-linking toxin VgrG1	23	0	0	55	100	100	inf	2.89844e-20	1.43415e-16	5.21509e-19	1	1	0	1	1
Cerro	group_3961		hypothetical protein	23	0	0	55	100	100	inf	2.89844e-20	1.43415e-16	5.21509e-19	1	1	0	1	1
Cerro	group_3984		hypothetical protein	23	0	0	55	100	100	inf	2.89844e-20	1.43415e-16	5.21509e-19	1	1	0	1	1
Cerro	yedK_2		SOS response-associated protein YedK	23	0	0	55	100	100	inf	2.89844e-20	1.43415e-16	5.21509e-19	1	1	0	1	1
Cerro	group_3986	hin	DNA-invertase hin	23	0	0	55	100	100	inf	2.89844e-20	1.43415e-16	5.21509e-19	1	1	0	1	1
Cerro	group_3987		hypothetical protein	23	0	0	55	100	100	inf	2.89844e-20	1.43415e-16	5.21509e-19	1	1	0	1	1
Cerro	group_3988		hypothetical protein	23	0	0	55	100	100	inf	2.89844e-20	1.43415e-16	5.21509e-19	1	1	0	1	1
Cerro	group_3989		hypothetical protein	23	0	0	55	100	100	inf	2.89844e-20	1.43415e-16	5.21509e-19	1	1	0	1	1
Cerro	group_4003		hypothetical protein	23	0	0	55	100	100	inf	2.89844e-20	1.43415e-16	5.21509e-19	1	1	0	1	1
Cerro	group_4009		hypothetical protein	23	0	0	55	100	100	inf	2.89844e-20	1.43415e-16	5.21509e-19	1	1	0	1	1
Cerro	group_4010		IS1 family transposase IS1D	23	0	0	55	100	100	inf	2.89844e-20	1.43415e-16	5.21509e-19	1	1	0	1	1
Cerro	cah		Carbonic anhydrase	23	0	0	55	100	100	inf	2.89844e-20	1.43415e-16	5.21509e-19	1	1	0	1	1
Cerro	group_785		hypothetical protein	23	0	0	55	100	100	inf	2.89844e-20	1.43415e-16	5.21509e-19	1	1	0	1	1
Cerro	group_793		hypothetical protein	23	0	0	55	100	100	inf	2.89844e-20	1.43415e-16	5.21509e-19	1	1	0	1	1
Cerro	group_83		hypothetical protein	23	0	0	55	100	100	inf	2.89844e-20	1.43415e-16	5.21509e-19	1	1	0	1	1
Cerro	group_919	manC1_2	Mannose-1-phosphate guanylyltransferase 1	23	0	0	55	100	100	inf	2.89844e-20	1.43415e-16	5.21509e-19	1	1	0	1	1
Cerro	group_1328		hypothetical protein	23	1	0	54	100	98.1818	inf	6.95626e-19	3.44196e-15	1.02745e-17	1	1	0	1	1
Cerro	group_1896		hypothetical protein	23	1	0	54	100	98.1818	inf	6.95626e-19	3.44196e-15	1.02745e-17	1	1	0	1	1
Cerro	intA_4		Prophage integrase IntA	23	1	0	54	100	98.1818	inf	6.95626e-19	3.44196e-15	1.02745e-17	1	1	0	1	1
Cerro	group_1918		hypothetical protein	23	1	0	54	100	98.1818	inf	6.95626e-19	3.44196e-15	1.02745e-17	1	1	0	1	1
Cerro	group_1919		hypothetical protein	23	1	0	54	100	98.1818	inf	6.95626e-19	3.44196e-15	1.02745e-17	1	1	0	1	1
Cerro	group_1926	yfcQ_1	putative fimbrial-like protein YfcQ	23	1	0	54	100	98.1818	inf	6.95626e-19	3.44196e-15	1.02745e-17	1	1	0	1	1
Cerro	azoR1		FMN-dependent NADH-azoreductase 1	23	1	0	54	100	98.1818	inf	6.95626e-19	3.44196e-15	1.02745e-17	1	1	0	1	1
Cerro	group_1994		hypothetical protein	23	1	0	54	100	98.1818	inf	6.95626e-19	3.44196e-15	1.02745e-17	1	1	0	1	1
Cerro	group_2817		hypothetical protein	23	1	0	54	100	98.1818	inf	6.95626e-19	3.44196e-15	1.02745e-17	1	1	0	1	1
Cerro	group_2818		hypothetical protein	23	1	0	54	100	98.1818	inf	6.95626e-19	3.44196e-15	1.02745e-17	1	1	0	1	1
Cerro	group_3331		hypothetical protein	23	1	0	54	100	98.1818	inf	6.95626e-19	3.44196e-15	1.02745e-17	1	1	0	1	1
Cerro	group_3364	yfcO	putative protein YfcO	23	1	0	54	100	98.1818	inf	6.95626e-19	3.44196e-15	1.02745e-17	1	1	0	1	1
Cerro	yfcP_1		putative fimbrial-like protein YfcP	23	1	0	54	100	98.1818	inf	6.95626e-19	3.44196e-15	1.02745e-17	1	1	0	1	1
Cerro	group_3366		hypothetical protein	23	1	0	54	100	98.1818	inf	6.95626e-19	3.44196e-15	1.02745e-17	1	1	0	1	1
Cerro	group_3378		hypothetical protein	23	1	0	54	100	98.1818	inf	6.95626e-19	3.44196e-15	1.02745e-17	1	1	0	1	1
Cerro	dmlR_2		HTH-type transcriptional regulator DmlR	23	1	0	54	100	98.1818	inf	6.95626e-19	3.44196e-15	1.02745e-17	1	1	0	1	1
Cerro	group_3704		Carnitine monooxygenase reductase subunit	23	1	0	54	100	98.1818	inf	6.95626e-19	3.44196e-15	1.02745e-17	1	1	0	1	1
Cerro	group_3822		hypothetical protein	23	1	0	54	100	98.1818	inf	6.95626e-19	3.44196e-15	1.02745e-17	1	1	0	1	1
Cerro	mdtK_2		Multidrug resistance protein MdtK	23	1	0	54	100	98.1818	inf	6.95626e-19	3.44196e-15	1.02745e-17	1	1	0	1	1
Cerro	group_819		hypothetical protein	23	1	0	54	100	98.1818	inf	6.95626e-19	3.44196e-15	1.02745e-17	1	1	0	1	1
Cerro	group_867	pxpC	5-oxoprolinase subunit C	23	1	0	54	100	98.1818	inf	6.95626e-19	3.44196e-15	1.02745e-17	1	1	0	1	1
Cerro	group_1164		hypothetical protein	22	0	1	55	95.6522	100	inf	1.62313e-18	8.03123e-15	2.2816e-17	1	1	0	1	1
Cerro	group_1165		hypothetical protein	22	0	1	55	95.6522	100	inf	1.62313e-18	8.03123e-15	2.2816e-17	1	1	0	1	1
Cerro	group_1180		hypothetical protein	22	0	1	55	95.6522	100	inf	1.62313e-18	8.03123e-15	2.2816e-17	1	1	0	1	1
Cerro	group_1988		hypothetical protein	22	0	1	55	95.6522	100	inf	1.62313e-18	8.03123e-15	2.2816e-17	1	1	0	1	1
Cerro	group_1995	algC_2	Phosphomannomutase/phosphoglucomutase	22	0	1	55	95.6522	100	inf	1.62313e-18	8.03123e-15	2.2816e-17	1	1	0	1	1
Cerro	group_2036		hypothetical protein	22	0	1	55	95.6522	100	inf	1.62313e-18	8.03123e-15	2.2816e-17	1	1	0	1	1
Cerro	group_3681		hypothetical protein	22	0	1	55	95.6522	100	inf	1.62313e-18	8.03123e-15	2.2816e-17	1	1	0	1	1
Cerro	group_3725		hypothetical protein	22	0	1	55	95.6522	100	inf	1.62313e-18	8.03123e-15	2.2816e-17	1	1	0	1	1
Cerro	group_3853		hypothetical protein	22	0	1	55	95.6522	100	inf	1.62313e-18	8.03123e-15	2.2816e-17	1	1	0	1	1
Cerro	rop		Regulatory protein rop	22	0	1	55	95.6522	100	inf	1.62313e-18	8.03123e-15	2.2816e-17	1	1	0	1	1
Cerro	group_4320		hypothetical protein	22	0	1	55	95.6522	100	inf	1.62313e-18	8.03123e-15	2.2816e-17	1	1	0	1	1
Cerro	group_4323		hypothetical protein	22	0	1	55	95.6522	100	inf	1.62313e-18	8.03123e-15	2.2816e-17	1	1	0	1	1
Cerro	group_4336		hypothetical protein	22	0	1	55	95.6522	100	inf	1.62313e-18	8.03123e-15	2.2816e-17	1	1	0	1	1
Cerro	group_1074		IS1 family transposase IS1R	23	2	0	53	100	96.3636	inf	8.69532e-18	4.30245e-14	1.17233e-16	1	1	0	1	1
Cerro	group_1178		hypothetical protein	23	2	0	53	100	96.3636	inf	8.69532e-18	4.30245e-14	1.17233e-16	1	1	0	1	1
Cerro	group_1329		hypothetical protein	23	2	0	53	100	96.3636	inf	8.69532e-18	4.30245e-14	1.17233e-16	1	1	0	1	1
Cerro	group_1950		hypothetical protein	23	2	0	53	100	96.3636	inf	8.69532e-18	4.30245e-14	1.17233e-16	1	1	0	1	1
Cerro	group_1953		hypothetical protein	23	2	0	53	100	96.3636	inf	8.69532e-18	4.30245e-14	1.17233e-16	1	1	0	1	1
Cerro	group_2017		hypothetical protein	23	2	0	53	100	96.3636	inf	8.69532e-18	4.30245e-14	1.17233e-16	1	1	0	1	1
Cerro	group_2528		hypothetical protein	23	2	0	53	100	96.3636	inf	8.69532e-18	4.30245e-14	1.17233e-16	1	1	0	1	1
Cerro	group_2819		hypothetical protein	23	2	0	53	100	96.3636	inf	8.69532e-18	4.30245e-14	1.17233e-16	1	1	0	1	1
Cerro	group_3691		hypothetical protein	23	2	0	53	100	96.3636	inf	8.69532e-18	4.30245e-14	1.17233e-16	1	1	0	1	1
Cerro	group_3740		hypothetical protein	23	2	0	53	100	96.3636	inf	8.69532e-18	4.30245e-14	1.17233e-16	1	1	0	1	1
Cerro	group_2037		hypothetical protein	21	0	2	55	91.3043	100	inf	4.62591e-17	2.2889e-13	6.10374e-16	1	1	0	1	1
Cerro	group_3731		hypothetical protein	21	0	2	55	91.3043	100	inf	4.62591e-17	2.2889e-13	6.10374e-16	1	1	0	1	1
Cerro	group_4005		hypothetical protein	21	0	2	55	91.3043	100	inf	4.62591e-17	2.2889e-13	6.10374e-16	1	1	0	1	1
Cerro	group_410		hypothetical protein	21	0	2	55	91.3043	100	inf	4.62591e-17	2.2889e-13	6.10374e-16	1	1	0	1	1
Cerro	group_4322		hypothetical protein	21	0	2	55	91.3043	100	inf	4.62591e-17	2.2889e-13	6.10374e-16	1	1	0	1	1
Cerro	group_835		hypothetical protein	21	0	2	55	91.3043	100	inf	4.62591e-17	2.2889e-13	6.10374e-16	1	1	0	1	1
Cerro	xerD_2		Tyrosine recombinase XerD	23	3	0	52	100	94.5455	inf	7.53595e-17	3.72879e-13	9.76122e-16	1	1	0	1	1
Cerro	group_3688		hypothetical protein	23	3	0	52	100	94.5455	inf	7.53595e-17	3.72879e-13	9.76122e-16	1	1	0	1	1
Cerro	group_3689		hypothetical protein	23	3	0	52	100	94.5455	inf	7.53595e-17	3.72879e-13	9.76122e-16	1	1	0	1	1
Cerro	group_3739		hypothetical protein	23	3	0	52	100	94.5455	inf	7.53595e-17	3.72879e-13	9.76122e-16	1	1	0	1	1
Cerro	group_3956		hypothetical protein	23	3	0	52	100	94.5455	inf	7.53595e-17	3.72879e-13	9.76122e-16	1	1	0	1	1
Cerro	group_816	nupG	Nucleoside permease NupG	23	3	0	52	100	94.5455	inf	7.53595e-17	3.72879e-13	9.76122e-16	1	1	0	1	1
Cerro	speC_1		Constitutive ornithine decarboxylase	23	3	0	52	100	94.5455	inf	7.53595e-17	3.72879e-13	9.76122e-16	1	1	0	1	1
Cerro	group_1966		hypothetical protein	22	2	1	53	95.6522	96.3636	583	4.32679e-16	2.1409e-12	5.58981e-15	1	1	1	1	1
Cerro	group_1137		hypothetical protein	23	4	0	51	100	92.7273	inf	5.08676e-16	2.51693e-12	6.3081e-15	1	1	0	1	1
Cerro	group_1998		hypothetical protein	23	4	0	51	100	92.7273	inf	5.08676e-16	2.51693e-12	6.3081e-15	1	1	0	1	1
Cerro	group_3823		hypothetical protein	23	4	0	51	100	92.7273	inf	5.08676e-16	2.51693e-12	6.3081e-15	1	1	0	1	1
Cerro	group_3990		hypothetical protein	23	4	0	51	100	92.7273	inf	5.08676e-16	2.51693e-12	6.3081e-15	1	1	0	1	1
Cerro	group_3991		hypothetical protein	23	4	0	51	100	92.7273	inf	5.08676e-16	2.51693e-12	6.3081e-15	1	1	0	1	1
Cerro	group_3992		hypothetical protein	23	4	0	51	100	92.7273	inf	5.08676e-16	2.51693e-12	6.3081e-15	1	1	0	1	1
Cerro	group_3993		hypothetical protein	23	4	0	51	100	92.7273	inf	5.08676e-16	2.51693e-12	6.3081e-15	1	1	0	1	1
Cerro	group_3995		hypothetical protein	23	4	0	51	100	92.7273	inf	5.08676e-16	2.51693e-12	6.3081e-15	1	1	0	1	1
Cerro	rrrD		Lysozyme RrrD	23	4	0	51	100	92.7273	inf	5.08676e-16	2.51693e-12	6.3081e-15	1	1	0	1	1
Cerro	group_3997		hypothetical protein	23	4	0	51	100	92.7273	inf	5.08676e-16	2.51693e-12	6.3081e-15	1	1	0	1	1
Cerro	group_3998		hypothetical protein	23	4	0	51	100	92.7273	inf	5.08676e-16	2.51693e-12	6.3081e-15	1	1	0	1	1
Cerro	group_4000		hypothetical protein	23	4	0	51	100	92.7273	inf	5.08676e-16	2.51693e-12	6.3081e-15	1	1	0	1	1
Cerro	group_4001		hypothetical protein	23	4	0	51	100	92.7273	inf	5.08676e-16	2.51693e-12	6.3081e-15	1	1	0	1	1
Cerro	group_1174		hypothetical protein	20	0	3	55	86.9565	100	inf	8.94343e-16	4.42521e-12	1.09807e-14	1	1	0	1	1
Cerro	group_3752		hypothetical protein	20	0	3	55	86.9565	100	inf	8.94343e-16	4.42521e-12	1.09807e-14	1	1	0	1	1
Cerro	group_4338		hypothetical protein	20	0	3	55	86.9565	100	inf	8.94343e-16	4.42521e-12	1.09807e-14	1	1	0	1	1
Cerro	group_1054		hypothetical protein	23	5	0	50	100	90.9091	inf	2.84859e-15	1.40948e-11	3.34e-14	1	1	0	1	1
Cerro	group_1334		hypothetical protein	23	5	0	50	100	90.9091	inf	2.84859e-15	1.40948e-11	3.34e-14	1	1	0	1	1
Cerro	group_1338		hypothetical protein	23	5	0	50	100	90.9091	inf	2.84859e-15	1.40948e-11	3.34e-14	1	1	0	1	1
Cerro	group_1904	asr	Acid shock protein	23	5	0	50	100	90.9091	inf	2.84859e-15	1.40948e-11	3.34e-14	1	1	0	1	1
Cerro	group_1911		hypothetical protein	23	5	0	50	100	90.9091	inf	2.84859e-15	1.40948e-11	3.34e-14	1	1	0	1	1
Cerro	group_1921		hypothetical protein	23	5	0	50	100	90.9091	inf	2.84859e-15	1.40948e-11	3.34e-14	1	1	0	1	1
Cerro	group_1999		hypothetical protein	23	5	0	50	100	90.9091	inf	2.84859e-15	1.40948e-11	3.34e-14	1	1	0	1	1
Cerro	group_2005		hypothetical protein	23	5	0	50	100	90.9091	inf	2.84859e-15	1.40948e-11	3.34e-14	1	1	0	1	1
Cerro	group_2035		hypothetical protein	23	5	0	50	100	90.9091	inf	2.84859e-15	1.40948e-11	3.34e-14	1	1	0	1	1
Cerro	group_2255		hypothetical protein	23	5	0	50	100	90.9091	inf	2.84859e-15	1.40948e-11	3.34e-14	1	1	0	1	1
Cerro	group_2524		hypothetical protein	23	5	0	50	100	90.9091	inf	2.84859e-15	1.40948e-11	3.34e-14	1	1	0	1	1
Cerro	yehB		Outer membrane usher protein YehB	23	5	0	50	100	90.9091	inf	2.84859e-15	1.40948e-11	3.34e-14	1	1	0	1	1
Cerro	group_3359		hypothetical protein	23	5	0	50	100	90.9091	inf	2.84859e-15	1.40948e-11	3.34e-14	1	1	0	1	1
Cerro	group_473	ygcB	CRISPR-associated endonuclease/helicase Cas3	23	5	0	50	100	90.9091	inf	2.84859e-15	1.40948e-11	3.34e-14	1	1	0	1	1
Cerro	group_524		hypothetical protein	23	5	0	50	100	90.9091	inf	2.84859e-15	1.40948e-11	3.34e-14	1	1	0	1	1
Cerro	group_802		IS3 family transposase IS1230B	23	5	0	50	100	90.9091	inf	2.84859e-15	1.40948e-11	3.34e-14	1	1	0	1	1
Cerro	group_1996		hypothetical protein	19	0	4	55	82.6087	100	inf	1.31916e-14	6.52718e-11	1.49397e-13	1	1	0	1	1
Cerro	group_4324		hypothetical protein	19	0	4	55	82.6087	100	inf	1.31916e-14	6.52718e-11	1.49397e-13	1	1	0	1	1
Cerro	group_4325		hypothetical protein	19	0	4	55	82.6087	100	inf	1.31916e-14	6.52718e-11	1.49397e-13	1	1	0	1	1
Cerro	group_4326		hypothetical protein	19	0	4	55	82.6087	100	inf	1.31916e-14	6.52718e-11	1.49397e-13	1	1	0	1	1
Cerro	group_4327		hypothetical protein	19	0	4	55	82.6087	100	inf	1.31916e-14	6.52718e-11	1.49397e-13	1	1	0	1	1
Cerro	group_4328		hypothetical protein	19	0	4	55	82.6087	100	inf	1.31916e-14	6.52718e-11	1.49397e-13	1	1	0	1	1
Cerro	group_4329		hypothetical protein	19	0	4	55	82.6087	100	inf	1.31916e-14	6.52718e-11	1.49397e-13	1	1	0	1	1
Cerro	group_4331		hypothetical protein	19	0	4	55	82.6087	100	inf	1.31916e-14	6.52718e-11	1.49397e-13	1	1	0	1	1
Cerro	hokC		Toxic protein HokC	19	0	4	55	82.6087	100	inf	1.31916e-14	6.52718e-11	1.49397e-13	1	1	0	1	1
Cerro	group_4333		hypothetical protein	19	0	4	55	82.6087	100	inf	1.31916e-14	6.52718e-11	1.49397e-13	1	1	0	1	1
Cerro	group_4334		hypothetical protein	19	0	4	55	82.6087	100	inf	1.31916e-14	6.52718e-11	1.49397e-13	1	1	0	1	1
Cerro	group_4335		hypothetical protein	19	0	4	55	82.6087	100	inf	1.31916e-14	6.52718e-11	1.49397e-13	1	1	0	1	1
Cerro	group_1864		hypothetical protein	23	6	0	49	100	89.0909	inf	1.37682e-14	6.81249e-11	1.49397e-13	1	1	0	1	1
Cerro	group_1938		hypothetical protein	23	6	0	49	100	89.0909	inf	1.37682e-14	6.81249e-11	1.49397e-13	1	1	0	1	1
Cerro	group_2280		hypothetical protein	23	6	0	49	100	89.0909	inf	1.37682e-14	6.81249e-11	1.49397e-13	1	1	0	1	1
Cerro	group_2281	chuR_1	Anaerobic sulfatase-maturating enzyme	23	6	0	49	100	89.0909	inf	1.37682e-14	6.81249e-11	1.49397e-13	1	1	0	1	1
Cerro	group_2282		N-acetylgalactosamine-6-O-sulfatase	23	6	0	49	100	89.0909	inf	1.37682e-14	6.81249e-11	1.49397e-13	1	1	0	1	1
Cerro	group_2283		hypothetical protein	23	6	0	49	100	89.0909	inf	1.37682e-14	6.81249e-11	1.49397e-13	1	1	0	1	1
Cerro	group_3954		hypothetical protein	23	6	0	49	100	89.0909	inf	1.37682e-14	6.81249e-11	1.49397e-13	1	1	0	1	1
Cerro	group_580		hypothetical protein	23	6	0	49	100	89.0909	inf	1.37682e-14	6.81249e-11	1.49397e-13	1	1	0	1	1
Cerro	group_762		hypothetical protein	23	6	0	49	100	89.0909	inf	1.37682e-14	6.81249e-11	1.49397e-13	1	1	0	1	1
Cerro	group_763		hypothetical protein	23	6	0	49	100	89.0909	inf	1.37682e-14	6.81249e-11	1.49397e-13	1	1	0	1	1
Cerro	intA_3		Prophage integrase IntA	23	7	0	48	100	87.2727	inf	5.90065e-14	2.91964e-10	6.05734e-13	1	1	0	1	1
Cerro	group_1327		hypothetical protein	23	7	0	48	100	87.2727	inf	5.90065e-14	2.91964e-10	6.05734e-13	1	1	0	1	1
Cerro	group_3554		hypothetical protein	23	7	0	48	100	87.2727	inf	5.90065e-14	2.91964e-10	6.05734e-13	1	1	0	1	1
Cerro	group_587		IS3 family transposase IS1351	23	7	0	48	100	87.2727	inf	5.90065e-14	2.91964e-10	6.05734e-13	1	1	0	1	1
Cerro	group_2022		hypothetical protein	23	8	0	47	100	85.4545	inf	2.2865e-13	1.13136e-09	2.31362e-12	1	1	0	1	1
Cerro	group_2023		hypothetical protein	23	8	0	47	100	85.4545	inf	2.2865e-13	1.13136e-09	2.31362e-12	1	1	0	1	1
Cerro	lexA_2		LexA repressor	23	8	0	47	100	85.4545	inf	2.2865e-13	1.13136e-09	2.31362e-12	1	1	0	1	1
Cerro	thiS		Sulfur carrier protein ThiS	23	8	0	47	100	85.4545	inf	2.2865e-13	1.13136e-09	2.31362e-12	1	1	0	1	1
Cerro	cobC_1		Adenosylcobalamin/alpha-ribazole phosphatase	23	8	0	47	100	85.4545	inf	2.2865e-13	1.13136e-09	2.31362e-12	1	1	0	1	1
Cerro	group_3953		hypothetical protein	23	8	0	47	100	85.4545	inf	2.2865e-13	1.13136e-09	2.31362e-12	1	1	0	1	1
Cerro	rcbA_2		Double-strand break reduction protein	19	1	4	54	82.6087	98.1818	256.5	2.46839e-13	1.22136e-09	2.45253e-12	1	1	1	1	1
Cerro	group_1890		hypothetical protein	19	1	4	54	82.6087	98.1818	256.5	2.46839e-13	1.22136e-09	2.45253e-12	1	1	1	1	1
Cerro	group_3140		hypothetical protein	19	1	4	54	82.6087	98.1818	256.5	2.46839e-13	1.22136e-09	2.45253e-12	1	1	1	1	1
Cerro	group_3141		hypothetical protein	19	1	4	54	82.6087	98.1818	256.5	2.46839e-13	1.22136e-09	2.45253e-12	1	1	1	1	1
Cerro	group_3142		hypothetical protein	19	1	4	54	82.6087	98.1818	256.5	2.46839e-13	1.22136e-09	2.45253e-12	1	1	1	1	1
Cerro	group_3143		hypothetical protein	19	1	4	54	82.6087	98.1818	256.5	2.46839e-13	1.22136e-09	2.45253e-12	1	1	1	1	1
Cerro	group_3148		hypothetical protein	19	1	4	54	82.6087	98.1818	256.5	2.46839e-13	1.22136e-09	2.45253e-12	1	1	1	1	1
Cerro	dnaT_2		Primosomal protein 1	19	1	4	54	82.6087	98.1818	256.5	2.46839e-13	1.22136e-09	2.45253e-12	1	1	1	1	1
Cerro	recE_2		Exodeoxyribonuclease 8	19	1	4	54	82.6087	98.1818	256.5	2.46839e-13	1.22136e-09	2.45253e-12	1	1	1	1	1
Cerro	group_992		hypothetical protein	22	6	1	49	95.6522	89.0909	179.667	5.48828e-13	2.7156e-09	5.44209e-12	1	1	1	1	1
Cerro	group_1984		hypothetical protein	23	9	0	46	100	83.6364	inf	8.12978e-13	4.02262e-09	7.94983e-12	1	1	0	1	1
Cerro	group_1990		hypothetical protein	23	9	0	46	100	83.6364	inf	8.12978e-13	4.02262e-09	7.94983e-12	1	1	0	1	1
Cerro	group_3835		hypothetical protein	23	9	0	46	100	83.6364	inf	8.12978e-13	4.02262e-09	7.94983e-12	1	1	0	1	1
Cerro	group_3838		hypothetical protein	23	9	0	46	100	83.6364	inf	8.12978e-13	4.02262e-09	7.94983e-12	1	1	0	1	1
Cerro	group_483	mnmC	tRNA 5-methylaminomethyl-2-thiouridine biosynthesis bifunctional protein MnmC	23	9	0	46	100	83.6364	inf	8.12978e-13	4.02262e-09	7.94983e-12	1	1	0	1	1
Cerro	group_1172	rhaR_2	HTH-type transcriptional activator RhaR	17	0	6	55	73.913	100	inf	1.60937e-12	7.96316e-09	1.56447e-11	1	1	0	1	1
Cerro	group_85		hypothetical protein	17	0	6	55	73.913	100	inf	1.60937e-12	7.96316e-09	1.56447e-11	1	1	0	1	1
Cerro	mdtD_2		Putative multidrug resistance protein MdtD	19	2	4	53	82.6087	96.3636	125.875	2.42217e-12	1.19849e-08	2.34998e-11	1	1	1	1	1
Cerro	group_1078		hypothetical protein	23	10	0	45	100	81.8182	inf	2.68283e-12	1.32746e-08	2.50938e-11	1	1	0	1	1
Cerro	group_1181		hypothetical protein	23	10	0	45	100	81.8182	inf	2.68283e-12	1.32746e-08	2.50938e-11	1	1	0	1	1
Cerro	group_1330		hypothetical protein	23	10	0	45	100	81.8182	inf	2.68283e-12	1.32746e-08	2.50938e-11	1	1	0	1	1
Cerro	recF_1		DNA replication and repair protein RecF	23	10	0	45	100	81.8182	inf	2.68283e-12	1.32746e-08	2.50938e-11	1	1	0	1	1
Cerro	lpxD_1		hypothetical protein	23	10	0	45	100	81.8182	inf	2.68283e-12	1.32746e-08	2.50938e-11	1	1	0	1	1
Cerro	group_2009		hypothetical protein	23	10	0	45	100	81.8182	inf	2.68283e-12	1.32746e-08	2.50938e-11	1	1	0	1	1
Cerro	group_3368		hypothetical protein	23	10	0	45	100	81.8182	inf	2.68283e-12	1.32746e-08	2.50938e-11	1	1	0	1	1
Cerro	group_3369	vapC	tRNA(fMet)-specific endonuclease VapC	23	10	0	45	100	81.8182	inf	2.68283e-12	1.32746e-08	2.50938e-11	1	1	0	1	1
Cerro	rayT		REP-associated tyrosine transposase	23	10	0	45	100	81.8182	inf	2.68283e-12	1.32746e-08	2.50938e-11	1	1	0	1	1
Cerro	group_3785		hypothetical protein	23	10	0	45	100	81.8182	inf	2.68283e-12	1.32746e-08	2.50938e-11	1	1	0	1	1
Cerro	group_3836		hypothetical protein	23	10	0	45	100	81.8182	inf	2.68283e-12	1.32746e-08	2.50938e-11	1	1	0	1	1
Cerro	group_3840		hypothetical protein	23	10	0	45	100	81.8182	inf	2.68283e-12	1.32746e-08	2.50938e-11	1	1	0	1	1
Cerro	group_3841		hypothetical protein	23	10	0	45	100	81.8182	inf	2.68283e-12	1.32746e-08	2.50938e-11	1	1	0	1	1
Cerro	group_525	ompN_2	Outer membrane porin N	23	10	0	45	100	81.8182	inf	2.68283e-12	1.32746e-08	2.50938e-11	1	1	0	1	1
Cerro	intA_1		Prophage integrase IntA	23	10	0	45	100	81.8182	inf	2.68283e-12	1.32746e-08	2.50938e-11	1	1	0	1	1
Cerro	group_626		hypothetical protein	23	10	0	45	100	81.8182	inf	2.68283e-12	1.32746e-08	2.50938e-11	1	1	0	1	1
Cerro	group_1336		hypothetical protein	23	11	0	44	100	80	inf	8.29238e-12	4.10307e-08	7.59827e-11	1	1	0	1	1
Cerro	group_18		hypothetical protein	23	11	0	44	100	80	inf	8.29238e-12	4.10307e-08	7.59827e-11	1	1	0	1	1
Cerro	group_1902		hypothetical protein	23	11	0	44	100	80	inf	8.29238e-12	4.10307e-08	7.59827e-11	1	1	0	1	1
Cerro	group_196		hypothetical protein	23	11	0	44	100	80	inf	8.29238e-12	4.10307e-08	7.59827e-11	1	1	0	1	1
Cerro	group_567		hypothetical protein	23	11	0	44	100	80	inf	8.29238e-12	4.10307e-08	7.59827e-11	1	1	0	1	1
Cerro	group_738		hypothetical protein	23	11	0	44	100	80	inf	8.29238e-12	4.10307e-08	7.59827e-11	1	1	0	1	1
Cerro	group_1888		hypothetical protein	19	3	4	52	82.6087	94.5455	82.3333	1.65809e-11	8.20425e-08	1.5137e-10	1	1	1	1	1
Cerro	group_3139		hypothetical protein	19	3	4	52	82.6087	94.5455	82.3333	1.65809e-11	8.20425e-08	1.5137e-10	1	1	1	1	1
Cerro	group_1060		hypothetical protein	23	12	0	43	100	78.1818	inf	2.41861e-11	1.19673e-07	2.19181e-10	1	1	0	1	1
Cerro	group_1068		hypothetical protein	23	12	0	43	100	78.1818	inf	2.41861e-11	1.19673e-07	2.19181e-10	1	1	0	1	1
Cerro	group_270		hypothetical protein	23	12	0	43	100	78.1818	inf	2.41861e-11	1.19673e-07	2.19181e-10	1	1	0	1	1
Cerro	group_651	nifJ	Pyruvate-flavodoxin oxidoreductase	23	12	0	43	100	78.1818	inf	2.41861e-11	1.19673e-07	2.19181e-10	1	1	0	1	1
Cerro	group_1073	prpR	Propionate catabolism operon regulatory protein	17	1	6	54	73.913	98.1818	153	2.62776e-11	1.30021e-07	2.37699e-10	1	1	1	1	1
Cerro	sopA_2		E3 ubiquitin-protein ligase SopA	22	9	1	46	95.6522	83.6364	112.444	2.76921e-11	1.3702e-07	2.50037e-10	1	1	1	1	1
Cerro	group_287		hypothetical protein	20	5	3	50	86.9565	90.9091	66.6667	3.65835e-11	1.81015e-07	3.29718e-10	1	1	1	1	1
Cerro	group_1182		hypothetical protein	23	13	0	42	100	76.3636	inf	6.69769e-11	3.31402e-07	5.88635e-10	1	1	0	1	1
Cerro	group_1331		hypothetical protein	23	13	0	42	100	76.3636	inf	6.69769e-11	3.31402e-07	5.88635e-10	1	1	0	1	1
Cerro	group_1832		hypothetical protein	23	13	0	42	100	76.3636	inf	6.69769e-11	3.31402e-07	5.88635e-10	1	1	0	1	1
Cerro	group_1835		hypothetical protein	23	13	0	42	100	76.3636	inf	6.69769e-11	3.31402e-07	5.88635e-10	1	1	0	1	1
Cerro	group_2034		hypothetical protein	23	13	0	42	100	76.3636	inf	6.69769e-11	3.31402e-07	5.88635e-10	1	1	0	1	1
Cerro	group_2233		hypothetical protein	23	13	0	42	100	76.3636	inf	6.69769e-11	3.31402e-07	5.88635e-10	1	1	0	1	1
Cerro	group_2737		hypothetical protein	23	13	0	42	100	76.3636	inf	6.69769e-11	3.31402e-07	5.88635e-10	1	1	0	1	1
Cerro	group_286		hypothetical protein	23	13	0	42	100	76.3636	inf	6.69769e-11	3.31402e-07	5.88635e-10	1	1	0	1	1
Cerro	group_3413		hypothetical protein	23	13	0	42	100	76.3636	inf	6.69769e-11	3.31402e-07	5.88635e-10	1	1	0	1	1
Cerro	dnaB_2		Replicative DNA helicase	23	13	0	42	100	76.3636	inf	6.69769e-11	3.31402e-07	5.88635e-10	1	1	0	1	1
Cerro	group_448		hypothetical protein	23	13	0	42	100	76.3636	inf	6.69769e-11	3.31402e-07	5.88635e-10	1	1	0	1	1
Cerro	group_736		hypothetical protein	23	13	0	42	100	76.3636	inf	6.69769e-11	3.31402e-07	5.88635e-10	1	1	0	1	1
Cerro	group_1183		hypothetical protein	23	14	0	41	100	74.5455	inf	1.7701e-10	8.75847e-07	1.51793e-09	1	1	0	1	1
Cerro	group_1335		hypothetical protein	23	14	0	41	100	74.5455	inf	1.7701e-10	8.75847e-07	1.51793e-09	1	1	0	1	1
Cerro	group_1456		hypothetical protein	23	14	0	41	100	74.5455	inf	1.7701e-10	8.75847e-07	1.51793e-09	1	1	0	1	1
Cerro	casC		CRISPR system Cascade subunit CasC	23	14	0	41	100	74.5455	inf	1.7701e-10	8.75847e-07	1.51793e-09	1	1	0	1	1
Cerro	group_1458		hypothetical protein	23	14	0	41	100	74.5455	inf	1.7701e-10	8.75847e-07	1.51793e-09	1	1	0	1	1
Cerro	group_1925		hypothetical protein	23	14	0	41	100	74.5455	inf	1.7701e-10	8.75847e-07	1.51793e-09	1	1	0	1	1
Cerro	group_2387	ygbT	CRISPR-associated endonuclease Cas1	23	14	0	41	100	74.5455	inf	1.7701e-10	8.75847e-07	1.51793e-09	1	1	0	1	1
Cerro	group_2388		hypothetical protein	23	14	0	41	100	74.5455	inf	1.7701e-10	8.75847e-07	1.51793e-09	1	1	0	1	1
Cerro	group_471	ygbF	CRISPR-associated endoribonuclease Cas2	23	14	0	41	100	74.5455	inf	1.7701e-10	8.75847e-07	1.51793e-09	1	1	0	1	1
Cerro	yfdH		Prophage bactoprenol glucosyl transferase	23	14	0	41	100	74.5455	inf	1.7701e-10	8.75847e-07	1.51793e-09	1	1	0	1	1
Cerro	group_1339		hypothetical protein	23	15	0	40	100	72.7273	inf	4.48426e-10	2.21881e-06	3.77349e-09	1	1	0	1	1
Cerro	group_1527		hypothetical protein	23	15	0	40	100	72.7273	inf	4.48426e-10	2.21881e-06	3.77349e-09	1	1	0	1	1
Cerro	ybgD		putative fimbrial-like protein YbgD	23	15	0	40	100	72.7273	inf	4.48426e-10	2.21881e-06	3.77349e-09	1	1	0	1	1
Cerro	group_2427		hypothetical protein	23	15	0	40	100	72.7273	inf	4.48426e-10	2.21881e-06	3.77349e-09	1	1	0	1	1
Cerro	group_737		hypothetical protein	23	15	0	40	100	72.7273	inf	4.48426e-10	2.21881e-06	3.77349e-09	1	1	0	1	1
Cerro	group_942	yecD	Isochorismatase family protein YecD	23	15	0	40	100	72.7273	inf	4.48426e-10	2.21881e-06	3.77349e-09	1	1	0	1	1
Cerro	group_976	pucK	Uric acid permease PucK	23	15	0	40	100	72.7273	inf	4.48426e-10	2.21881e-06	3.77349e-09	1	1	0	1	1
Cerro	group_3742		hypothetical protein	14	0	9	55	60.8696	100	inf	7.98248e-10	3.94973e-06	6.70582e-09	1	1	0	1	1
Cerro	yadK		putative fimbrial-like protein YadK	23	16	0	39	100	70.9091	inf	2.18608e-09	1.08167e-05	1.79085e-08	1	1	0	1	1
Cerro	yadL		putative fimbrial-like protein YadL	23	16	0	39	100	70.9091	inf	2.18608e-09	1.08167e-05	1.79085e-08	1	1	0	1	1
Cerro	group_1930		hypothetical protein	23	16	0	39	100	70.9091	inf	2.18608e-09	1.08167e-05	1.79085e-08	1	1	0	1	1
Cerro	sseL		Deubiquitinase SseL	23	16	0	39	100	70.9091	inf	2.18608e-09	1.08167e-05	1.79085e-08	1	1	0	1	1
Cerro	group_2804		putative HTH-type transcriptional regulator	23	16	0	39	100	70.9091	inf	2.18608e-09	1.08167e-05	1.79085e-08	1	1	0	1	1
Cerro	group_2805		hypothetical protein	23	16	0	39	100	70.9091	inf	2.18608e-09	1.08167e-05	1.79085e-08	1	1	0	1	1
Cerro	yadM		putative fimbrial-like protein YadM	23	16	0	39	100	70.9091	inf	2.18608e-09	1.08167e-05	1.79085e-08	1	1	0	1	1
Cerro	group_739		hypothetical protein	23	16	0	39	100	70.9091	inf	2.18608e-09	1.08167e-05	1.79085e-08	1	1	0	1	1
Cerro	dmsB_3		Anaerobic dimethyl sulfoxide reductase chain B	23	16	0	39	100	70.9091	inf	2.18608e-09	1.08167e-05	1.79085e-08	1	1	0	1	1
Cerro	group_1175		hypothetical protein	23	17	0	38	100	69.0909	inf	3.02028e-09	1.49444e-05	2.39493e-08	1	1	0	1	1
Cerro	group_1793		hypothetical protein	23	17	0	38	100	69.0909	inf	3.02028e-09	1.49444e-05	2.39493e-08	1	1	0	1	1
Cerro	group_1917		hypothetical protein	23	17	0	38	100	69.0909	inf	3.02028e-09	1.49444e-05	2.39493e-08	1	1	0	1	1
Cerro	lpfA		putative major fimbrial subunit LpfA	23	17	0	38	100	69.0909	inf	3.02028e-09	1.49444e-05	2.39493e-08	1	1	0	1	1
Cerro	yadV_1		putative fimbrial chaperone YadV	23	17	0	38	100	69.0909	inf	3.02028e-09	1.49444e-05	2.39493e-08	1	1	0	1	1
Cerro	group_2799		hypothetical protein	23	17	0	38	100	69.0909	inf	3.02028e-09	1.49444e-05	2.39493e-08	1	1	0	1	1
Cerro	rpsT		30S ribosomal protein S20	23	17	0	38	100	69.0909	inf	3.02028e-09	1.49444e-05	2.39493e-08	1	1	0	1	1
Cerro	group_3375		hypothetical protein	23	17	0	38	100	69.0909	inf	3.02028e-09	1.49444e-05	2.39493e-08	1	1	0	1	1
Cerro	htrE		Outer membrane usher protein HtrE	23	17	0	38	100	69.0909	inf	3.02028e-09	1.49444e-05	2.39493e-08	1	1	0	1	1
Cerro	group_995		hypothetical protein	22	14	1	41	95.6522	74.5455	64.4286	4.68838e-09	2.31981e-05	3.7117e-08	1	1	1	1	1
Cerro	group_145		hypothetical protein	13	0	10	55	56.5217	100	inf	5.18861e-09	2.56732e-05	4.10116e-08	1	1	0	1	1
Cerro	group_1100		hypothetical protein	23	18	0	37	100	67.2727	inf	6.03513e-09	2.98618e-05	4.71006e-08	1	1	0	1	1
Cerro	group_1184		hypothetical protein	23	18	0	37	100	67.2727	inf	6.03513e-09	2.98618e-05	4.71006e-08	1	1	0	1	1
Cerro	group_119		hypothetical protein	23	18	0	37	100	67.2727	inf	6.03513e-09	2.98618e-05	4.71006e-08	1	1	0	1	1
Cerro	group_150		hypothetical protein	23	18	0	37	100	67.2727	inf	6.03513e-09	2.98618e-05	4.71006e-08	1	1	0	1	1
Cerro	group_185		IS3 family transposase ISSty2	23	18	0	37	100	67.2727	inf	6.03513e-09	2.98618e-05	4.71006e-08	1	1	0	1	1
Cerro	cfaE		CFA/I fimbrial subunit E	23	18	0	37	100	67.2727	inf	6.03513e-09	2.98618e-05	4.71006e-08	1	1	0	1	1
Cerro	group_2653		hypothetical protein	23	18	0	37	100	67.2727	inf	6.03513e-09	2.98618e-05	4.71006e-08	1	1	0	1	1
Cerro	group_625		hypothetical protein	23	18	0	37	100	67.2727	inf	6.03513e-09	2.98618e-05	4.71006e-08	1	1	0	1	1
Cerro	group_1136		IS3 family transposase ISSen1	23	19	0	36	100	65.4545	inf	1.76379e-08	8.72723e-05	1.31434e-07	1	1	0	1	1
Cerro	group_1142		hypothetical protein	23	19	0	36	100	65.4545	inf	1.76379e-08	8.72723e-05	1.31434e-07	1	1	0	1	1
Cerro	group_1187		hypothetical protein	23	19	0	36	100	65.4545	inf	1.76379e-08	8.72723e-05	1.31434e-07	1	1	0	1	1
Cerro	group_2007		hypothetical protein	23	19	0	36	100	65.4545	inf	1.76379e-08	8.72723e-05	1.31434e-07	1	1	0	1	1
Cerro	group_2008		hypothetical protein	23	19	0	36	100	65.4545	inf	1.76379e-08	8.72723e-05	1.31434e-07	1	1	0	1	1
Cerro	group_2033		hypothetical protein	23	19	0	36	100	65.4545	inf	1.76379e-08	8.72723e-05	1.31434e-07	1	1	0	1	1
Cerro	group_2045		hypothetical protein	23	19	0	36	100	65.4545	inf	1.76379e-08	8.72723e-05	1.31434e-07	1	1	0	1	1
Cerro	group_250		hypothetical protein	23	19	0	36	100	65.4545	inf	1.76379e-08	8.72723e-05	1.31434e-07	1	1	0	1	1
Cerro	group_351		hypothetical protein	23	19	0	36	100	65.4545	inf	1.76379e-08	8.72723e-05	1.31434e-07	1	1	0	1	1
Cerro	group_3839		hypothetical protein	23	19	0	36	100	65.4545	inf	1.76379e-08	8.72723e-05	1.31434e-07	1	1	0	1	1
Cerro	group_3842		hypothetical protein	23	19	0	36	100	65.4545	inf	1.76379e-08	8.72723e-05	1.31434e-07	1	1	0	1	1
Cerro	group_3843		hypothetical protein	23	19	0	36	100	65.4545	inf	1.76379e-08	8.72723e-05	1.31434e-07	1	1	0	1	1
Cerro	group_389		hypothetical protein	23	19	0	36	100	65.4545	inf	1.76379e-08	8.72723e-05	1.31434e-07	1	1	0	1	1
Cerro	group_4699		hypothetical protein	23	19	0	36	100	65.4545	inf	1.76379e-08	8.72723e-05	1.31434e-07	1	1	0	1	1
Cerro	group_573		hypothetical protein	23	19	0	36	100	65.4545	inf	1.76379e-08	8.72723e-05	1.31434e-07	1	1	0	1	1
Cerro	group_627		hypothetical protein	23	19	0	36	100	65.4545	inf	1.76379e-08	8.72723e-05	1.31434e-07	1	1	0	1	1
Cerro	group_628		hypothetical protein	23	19	0	36	100	65.4545	inf	1.76379e-08	8.72723e-05	1.31434e-07	1	1	0	1	1
Cerro	group_629		hypothetical protein	23	19	0	36	100	65.4545	inf	1.76379e-08	8.72723e-05	1.31434e-07	1	1	0	1	1
Cerro	group_65		hypothetical protein	23	19	0	36	100	65.4545	inf	1.76379e-08	8.72723e-05	1.31434e-07	1	1	0	1	1
Cerro	yesR		Unsaturated rhamnogalacturonyl hydrolase YesR	23	19	0	36	100	65.4545	inf	1.76379e-08	8.72723e-05	1.31434e-07	1	1	0	1	1
Cerro	ddrA_1		Diol dehydratase-reactivating factor alpha subunit	23	20	0	35	100	63.6364	inf	2.97057e-08	0.000146984	2.14888e-07	1	1	0	1	1
Cerro	oadG_2		Oxaloacetate decarboxylase gamma chain	23	20	0	35	100	63.6364	inf	2.97057e-08	0.000146984	2.14888e-07	1	1	0	1	1
Cerro	yfcQ_1		putative fimbrial-like protein YfcQ	23	20	0	35	100	63.6364	inf	2.97057e-08	0.000146984	2.14888e-07	1	1	0	1	1
Cerro	group_1909		hypothetical protein	23	20	0	35	100	63.6364	inf	2.97057e-08	0.000146984	2.14888e-07	1	1	0	1	1
Cerro	group_1940		hypothetical protein	23	20	0	35	100	63.6364	inf	2.97057e-08	0.000146984	2.14888e-07	1	1	0	1	1
Cerro	group_2238		hypothetical protein	23	20	0	35	100	63.6364	inf	2.97057e-08	0.000146984	2.14888e-07	1	1	0	1	1
Cerro	group_2443		hypothetical protein	23	20	0	35	100	63.6364	inf	2.97057e-08	0.000146984	2.14888e-07	1	1	0	1	1
Cerro	group_2981	papC_3	Outer membrane usher protein PapC	23	20	0	35	100	63.6364	inf	2.97057e-08	0.000146984	2.14888e-07	1	1	0	1	1
Cerro	yfcS_1		putative fimbrial chaperone YfcS	23	20	0	35	100	63.6364	inf	2.97057e-08	0.000146984	2.14888e-07	1	1	0	1	1
Cerro	yfcR_1		putative fimbrial-like protein YfcR	23	20	0	35	100	63.6364	inf	2.97057e-08	0.000146984	2.14888e-07	1	1	0	1	1
Cerro	norR_3		Anaerobic nitric oxide reductase transcription regulator NorR	23	20	0	35	100	63.6364	inf	2.97057e-08	0.000146984	2.14888e-07	1	1	0	1	1
Cerro	group_3420	frlB_2	Fructosamine deglycase FrlB	23	20	0	35	100	63.6364	inf	2.97057e-08	0.000146984	2.14888e-07	1	1	0	1	1
Cerro	manZ_2		PTS system mannose-specific EIID component	23	20	0	35	100	63.6364	inf	2.97057e-08	0.000146984	2.14888e-07	1	1	0	1	1
Cerro	sorC		PTS system sorbose-specific EIIC component	23	20	0	35	100	63.6364	inf	2.97057e-08	0.000146984	2.14888e-07	1	1	0	1	1
Cerro	group_3423	sorB	PTS system sorbose-specific EIIB component	23	20	0	35	100	63.6364	inf	2.97057e-08	0.000146984	2.14888e-07	1	1	0	1	1
Cerro	group_3424		hypothetical protein	23	20	0	35	100	63.6364	inf	2.97057e-08	0.000146984	2.14888e-07	1	1	0	1	1
Cerro	group_712		hypothetical protein	23	20	0	35	100	63.6364	inf	2.97057e-08	0.000146984	2.14888e-07	1	1	0	1	1
Cerro	group_4008		IS200/IS605 family transposase ISSen6	12	0	11	55	52.1739	100	inf	3.11317e-08	0.000154039	2.24875e-07	1	1	0	1	1
Cerro	group_3999		hypothetical protein	18	7	5	48	78.2609	87.2727	24.6857	4.15225e-08	0.000205453	2.99494e-07	1	1	1	1	1
Cerro	group_327	mdtA	Multidrug resistance protein MdtA	13	1	10	54	56.5217	98.1818	70.2	6.22633e-08	0.000308079	4.48441e-07	1	1	1	1	1
Cerro	group_140		hypothetical protein	23	21	0	34	100	61.8182	inf	8.44867e-08	0.00041804	5.79003e-07	1	1	0	1	1
Cerro	lpp1_1		Major outer membrane lipoprotein Lpp 1	23	21	0	34	100	61.8182	inf	8.44867e-08	0.00041804	5.79003e-07	1	1	0	1	1
Cerro	group_1748		hypothetical protein	23	21	0	34	100	61.8182	inf	8.44867e-08	0.00041804	5.79003e-07	1	1	0	1	1
Cerro	pnuC_2		Nicotinamide riboside transporter PnuC	23	21	0	34	100	61.8182	inf	8.44867e-08	0.00041804	5.79003e-07	1	1	0	1	1
Cerro	mrpA		Major MR/P fimbria protein	23	21	0	34	100	61.8182	inf	8.44867e-08	0.00041804	5.79003e-07	1	1	0	1	1
Cerro	group_2436		hypothetical protein	23	21	0	34	100	61.8182	inf	8.44867e-08	0.00041804	5.79003e-07	1	1	0	1	1
Cerro	group_2540		hypothetical protein	23	21	0	34	100	61.8182	inf	8.44867e-08	0.00041804	5.79003e-07	1	1	0	1	1
Cerro	deoD_2		Purine nucleoside phosphorylase DeoD-type	23	21	0	34	100	61.8182	inf	8.44867e-08	0.00041804	5.79003e-07	1	1	0	1	1
Cerro	group_2665		hypothetical protein	23	21	0	34	100	61.8182	inf	8.44867e-08	0.00041804	5.79003e-07	1	1	0	1	1
Cerro	caf1M		Chaperone protein caf1M	23	21	0	34	100	61.8182	inf	8.44867e-08	0.00041804	5.79003e-07	1	1	0	1	1
Cerro	amyA		Cytoplasmic alpha-amylase	23	21	0	34	100	61.8182	inf	8.44867e-08	0.00041804	5.79003e-07	1	1	0	1	1
Cerro	ccmH		Cytochrome c-type biogenesis protein CcmH	21	14	2	41	91.3043	74.5455	30.75	9.04258e-08	0.000447427	6.18848e-07	1	1	1	1	1
Cerro	group_3007		hypothetical protein	23	22	0	33	100	60	inf	1.29757e-07	0.000642038	8.6528e-07	1	1	0	1	1
Cerro	group_3671	rhaS_1	HTH-type transcriptional activator RhaS	23	22	0	33	100	60	inf	1.29757e-07	0.000642038	8.6528e-07	1	1	0	1	1
Cerro	group_3672	rhtC_1	Threonine efflux protein	23	22	0	33	100	60	inf	1.29757e-07	0.000642038	8.6528e-07	1	1	0	1	1
Cerro	dpiB		Sensor histidine kinase DpiB	23	22	0	33	100	60	inf	1.29757e-07	0.000642038	8.6528e-07	1	1	0	1	1
Cerro	group_4006		IS200/IS605 family transposase ISSen6	11	0	12	55	47.8261	100	inf	1.73818e-07	0.000860054	1.15289e-06	1	1	0	1	1
Cerro	group_4339		hypothetical protein	11	0	12	55	47.8261	100	inf	1.73818e-07	0.000860054	1.15289e-06	1	1	0	1	1
Cerro	group_7695	oadB_3	Oxaloacetate decarboxylase beta chain	11	0	12	55	47.8261	100	inf	1.73818e-07	0.000860054	1.15289e-06	1	1	0	1	1
Cerro	group_122		hypothetical protein	22	19	1	36	95.6522	65.4545	41.6842	2.79545e-07	0.00138319	1.84918e-06	1	1	1	1	1
Cerro	group_728		hypothetical protein	22	19	1	36	95.6522	65.4545	41.6842	2.79545e-07	0.00138319	1.84918e-06	1	1	1	1	1
Cerro	cfaB		CFA/I fimbrial subunit B	23	23	0	32	100	58.1818	inf	3.41944e-07	0.00169194	2.20018e-06	1	1	0	1	1
Cerro	group_1764		hypothetical protein	23	23	0	32	100	58.1818	inf	3.41944e-07	0.00169194	2.20018e-06	1	1	0	1	1
Cerro	group_2385		hypothetical protein	23	23	0	32	100	58.1818	inf	3.41944e-07	0.00169194	2.20018e-06	1	1	0	1	1
Cerro	group_2562		hypothetical protein	23	23	0	32	100	58.1818	inf	3.41944e-07	0.00169194	2.20018e-06	1	1	0	1	1
Cerro	group_2564		hypothetical protein	23	23	0	32	100	58.1818	inf	3.41944e-07	0.00169194	2.20018e-06	1	1	0	1	1
Cerro	group_2565		IS21 family transposase ISEc62	23	23	0	32	100	58.1818	inf	3.41944e-07	0.00169194	2.20018e-06	1	1	0	1	1
Cerro	group_345	dmlR_4	HTH-type transcriptional regulator DmlR	23	23	0	32	100	58.1818	inf	3.41944e-07	0.00169194	2.20018e-06	1	1	0	1	1
Cerro	tfaE_1		Prophage tail fiber assembly protein TfaE	23	23	0	32	100	58.1818	inf	3.41944e-07	0.00169194	2.20018e-06	1	1	0	1	1
Cerro	add		Adenosine deaminase	23	23	0	32	100	58.1818	inf	3.41944e-07	0.00169194	2.20018e-06	1	1	0	1	1
Cerro	group_751		hypothetical protein	23	23	0	32	100	58.1818	inf	3.41944e-07	0.00169194	2.20018e-06	1	1	0	1	1
Cerro	group_804		hypothetical protein	23	23	0	32	100	58.1818	inf	3.41944e-07	0.00169194	2.20018e-06	1	1	0	1	1
Cerro	group_4	oadA_2	Oxaloacetate decarboxylase alpha chain	12	1	11	54	52.1739	98.1818	58.9091	3.42448e-07	0.00169443	2.20056e-06	1	1	1	1	1
Cerro	group_115		IS3 family transposase IS1351	23	24	0	31	100	56.3636	inf	5.08551e-07	0.00251631	3.22604e-06	1	1	0	1	1
Cerro	thiL		Thiamine-monophosphate kinase	23	24	0	31	100	56.3636	inf	5.08551e-07	0.00251631	3.22604e-06	1	1	0	1	1
Cerro	thiF		Sulfur carrier protein ThiS adenylyltransferase	23	24	0	31	100	56.3636	inf	5.08551e-07	0.00251631	3.22604e-06	1	1	0	1	1
Cerro	group_2897		hypothetical protein	23	24	0	31	100	56.3636	inf	5.08551e-07	0.00251631	3.22604e-06	1	1	0	1	1
Cerro	group_156		hypothetical protein	10	0	13	55	43.4783	100	inf	9.09204e-07	0.00449874	5.70183e-06	1	1	0	1	1
Cerro	group_1976		hypothetical protein	23	25	0	30	100	54.5455	inf	1.22092e-06	0.00604109	7.47659e-06	1	1	0	1	1
Cerro	group_1977		hypothetical protein	23	25	0	30	100	54.5455	inf	1.22092e-06	0.00604109	7.47659e-06	1	1	0	1	1
Cerro	lip-1		Lipase 1	23	25	0	30	100	54.5455	inf	1.22092e-06	0.00604109	7.47659e-06	1	1	0	1	1
Cerro	group_545		hypothetical protein	23	25	0	30	100	54.5455	inf	1.22092e-06	0.00604109	7.47659e-06	1	1	0	1	1
Cerro	fadL		Long-chain fatty acid transport protein	23	25	0	30	100	54.5455	inf	1.22092e-06	0.00604109	7.47659e-06	1	1	0	1	1
Cerro	group_449		hypothetical protein	23	26	0	29	100	52.7273	inf	1.81955e-06	0.00900314	1.08081e-05	1	1	0	1	1
Cerro	group_7692	oadB_2	Oxaloacetate decarboxylase beta chain	12	2	11	53	52.1739	96.3636	28.9091	2.02356e-06	0.0100126	1.20055e-05	1	1	1	1	1
Cerro	group_3036		hypothetical protein	22	22	1	33	95.6522	60	33	2.69235e-06	0.0133217	1.59351e-05	1	1	1	1	1
Cerro	ccmA		Cytochrome c biogenesis ATP-binding export protein CcmA	20	16	3	39	86.9565	70.9091	16.25	3.12433e-06	0.0154592	1.84697e-05	1	1	1	1	1
Cerro	group_1836		hypothetical protein	23	27	0	28	100	50.9091	inf	3.98539e-06	0.0197197	2.3037e-05	1	1	0	1	1
Cerro	group_297		hypothetical protein	23	27	0	28	100	50.9091	inf	3.98539e-06	0.0197197	2.3037e-05	1	1	0	1	1
Cerro	group_290		hypothetical protein	9	0	14	55	39.1304	100	inf	4.48108e-06	0.0221724	2.57818e-05	1	1	0	1	1
Cerro	group_411		hypothetical protein	9	0	14	55	39.1304	100	inf	4.48108e-06	0.0221724	2.57818e-05	1	1	0	1	1
Cerro	group_531	tsr_2	Methyl-accepting chemotaxis protein I	9	0	14	55	39.1304	100	inf	4.48108e-06	0.0221724	2.57818e-05	1	1	0	1	1
Cerro	phnT_1		Putative 2-aminoethylphosphonate import ATP-binding protein PhnT	9	0	14	55	39.1304	100	inf	4.48108e-06	0.0221724	2.57818e-05	1	1	0	1	1
Cerro	group_413		hypothetical protein	13	4	10	51	56.5217	92.7273	16.575	6.5743e-06	0.0325297	3.77812e-05	1	1	1	1	1
Cerro	decR_2		DNA-binding transcriptional activator DecR	22	23	1	32	95.6522	58.1818	30.6087	7.83913e-06	0.038788	4.48935e-05	1	1	1	1	1
Cerro	group_300	dmsA_1	hypothetical protein	10	1	13	54	43.4783	98.1818	41.5385	8.26306e-06	0.0408856	4.72666e-05	1	1	1	1	1
Cerro	group_1105		hypothetical protein	23	28	0	27	100	49.0909	inf	1.04434e-05	0.0516737	5.67843e-05	1	1	0	1	1
Cerro	group_1144		hypothetical protein	23	28	0	27	100	49.0909	inf	1.04434e-05	0.0516737	5.67843e-05	1	1	0	1	1
Cerro	group_1452		hypothetical protein	23	28	0	27	100	49.0909	inf	1.04434e-05	0.0516737	5.67843e-05	1	1	0	1	1
Cerro	lpp1_2		Major outer membrane lipoprotein Lpp 1	23	28	0	27	100	49.0909	inf	1.04434e-05	0.0516737	5.67843e-05	1	1	0	1	1
Cerro	group_228		hypothetical protein	23	28	0	27	100	49.0909	inf	1.04434e-05	0.0516737	5.67843e-05	1	1	0	1	1
Cerro	group_2384		hypothetical protein	23	28	0	27	100	49.0909	inf	1.04434e-05	0.0516737	5.67843e-05	1	1	0	1	1
Cerro	wecA		Undecaprenyl-phosphate alpha-N-acetylglucosaminyl 1-phosphate transferase	23	28	0	27	100	49.0909	inf	1.04434e-05	0.0516737	5.67843e-05	1	1	0	1	1
Cerro	yliI		Aldose sugar dehydrogenase YliI	23	28	0	27	100	49.0909	inf	1.04434e-05	0.0516737	5.67843e-05	1	1	0	1	1
Cerro	group_357		hypothetical protein	23	28	0	27	100	49.0909	inf	1.04434e-05	0.0516737	5.67843e-05	1	1	0	1	1
Cerro	oadA_1		Oxaloacetate decarboxylase alpha chain	23	29	0	26	100	47.2727	inf	1.21945e-05	0.0603382	6.48798e-05	1	1	0	1	1
Cerro	group_1840		hypothetical protein	23	29	0	26	100	47.2727	inf	1.21945e-05	0.0603382	6.48798e-05	1	1	0	1	1
Cerro	group_398		hypothetical protein	23	29	0	26	100	47.2727	inf	1.21945e-05	0.0603382	6.48798e-05	1	1	0	1	1
Cerro	group_568		hypothetical protein	23	29	0	26	100	47.2727	inf	1.21945e-05	0.0603382	6.48798e-05	1	1	0	1	1
Cerro	group_988	yadV_2	putative fimbrial chaperone YadV	23	29	0	26	100	47.2727	inf	1.21945e-05	0.0603382	6.48798e-05	1	1	0	1	1
Cerro	recT_2		Protein RecT	19	16	4	39	82.6087	70.9091	11.5781	1.68417e-05	0.0833327	8.95088e-05	1	1	1	1	1
Cerro	group_1058		hypothetical protein	8	0	15	55	34.7826	100	inf	2.09117e-05	0.103471	0.000110783	1	1	0	1	1
Cerro	group_1193		hypothetical protein	8	0	15	55	34.7826	100	inf	2.09117e-05	0.103471	0.000110783	1	1	0	1	1
Cerro	group_253		hypothetical protein	8	0	15	55	34.7826	100	inf	2.09117e-05	0.103471	0.000110783	1	1	0	1	1
Cerro	group_103		hypothetical protein	23	30	0	25	100	45.4545	inf	2.79577e-05	0.138335	0.000146077	1	1	0	1	1
Cerro	oadG_3		Oxaloacetate decarboxylase gamma chain	23	30	0	25	100	45.4545	inf	2.79577e-05	0.138335	0.000146077	1	1	0	1	1
Cerro	group_404		hypothetical protein	23	30	0	25	100	45.4545	inf	2.79577e-05	0.138335	0.000146077	1	1	0	1	1
Cerro	group_589		hypothetical protein	23	30	0	25	100	45.4545	inf	2.79577e-05	0.138335	0.000146077	1	1	0	1	1
Cerro	group_1138		hypothetical protein	18	14	5	41	78.2609	74.5455	10.5429	2.80337e-05	0.138711	0.000146319	1	1	1	1	1
Cerro	group_2256		hypothetical protein	14	7	9	48	60.8696	87.2727	10.6667	3.30822e-05	0.163691	0.000172487	1	1	1	1	1
Cerro	parE4		hypothetical protein	23	31	0	24	100	43.6364	inf	3.55222e-05	0.175764	0.000181574	1	1	0	1	1
Cerro	sfmD		Outer membrane usher protein SfmD	23	31	0	24	100	43.6364	inf	3.55222e-05	0.175764	0.000181574	1	1	0	1	1
Cerro	group_521		hypothetical protein	19	17	4	38	82.6087	69.0909	10.6176	4.08452e-05	0.202102	0.000208436	1	1	1	1	1
Cerro	slrP_1		E3 ubiquitin-protein ligase SlrP	10	2	13	53	43.4783	96.3636	20.3846	4.08615e-05	0.202183	0.000208436	1	1	1	1	1
Cerro	esiB		Secretory immunoglobulin A-binding protein EsiB	23	32	0	23	100	41.8182	inf	7.29314e-05	0.360864	0.000364142	1	1	0	1	1
Cerro	group_1125		hypothetical protein	23	32	0	23	100	41.8182	inf	7.29314e-05	0.360864	0.000364142	1	1	0	1	1
Cerro	group_2568		hypothetical protein	23	32	0	23	100	41.8182	inf	7.29314e-05	0.360864	0.000364142	1	1	0	1	1
Cerro	yjgH		RutC family protein YjgH	23	32	0	23	100	41.8182	inf	7.29314e-05	0.360864	0.000364142	1	1	0	1	1
Cerro	norR_2		Anaerobic nitric oxide reductase transcription regulator NorR	23	32	0	23	100	41.8182	inf	7.29314e-05	0.360864	0.000364142	1	1	0	1	1
Cerro	rhsB		putative deoxyribonuclease RhsB	23	32	0	23	100	41.8182	inf	7.29314e-05	0.360864	0.000364142	1	1	0	1	1
Cerro	mdtB_2		Multidrug resistance protein MdtB	7	0	16	55	30.4348	100	inf	9.27956e-05	0.459153	0.000460534	1	1	0	1	1
Cerro	group_206		hypothetical protein	7	0	16	55	30.4348	100	inf	9.27956e-05	0.459153	0.000460534	1	1	0	1	1
Cerro	group_288		hypothetical protein	7	0	16	55	30.4348	100	inf	9.27956e-05	0.459153	0.000460534	1	1	0	1	1
Cerro	group_4007		IS200/IS605 family transposase ISSen6	7	0	16	55	30.4348	100	inf	9.27956e-05	0.459153	0.000460534	1	1	0	1	1
Cerro	group_4681		hypothetical protein	7	0	16	55	30.4348	100	inf	9.27956e-05	0.459153	0.000460534	1	1	0	1	1
Cerro	group_1103		hypothetical protein	13	7	10	48	56.5217	87.2727	8.91429	0.000130109	0.643779	0.000644423	1	1	1	1	1
Cerro	slrP_2		E3 ubiquitin-protein ligase SlrP	9	2	14	53	39.1304	96.3636	17.0357	0.00016427	0.812807	0.000797549	1	1	1	1	1
Cerro	group_1065		hypothetical protein	23	33	0	22	100	40	inf	0.000169568	0.839021	0.000797549	1	1	0	1	1
Cerro	group_1082	ybdO_2	putative HTH-type transcriptional regulator YbdO	23	33	0	22	100	40	inf	0.000169568	0.839021	0.000797549	1	1	0	1	1
Cerro	hscC		Chaperone protein HscC	23	33	0	22	100	40	inf	0.000169568	0.839021	0.000797549	1	1	0	1	1
Cerro	group_1096		hypothetical protein	23	33	0	22	100	40	inf	0.000169568	0.839021	0.000797549	1	1	0	1	1
Cerro	group_1114		hypothetical protein	23	33	0	22	100	40	inf	0.000169568	0.839021	0.000797549	1	1	0	1	1
Cerro	sifA_2		Secreted effector protein SifA	23	33	0	22	100	40	inf	0.000169568	0.839021	0.000797549	1	1	0	1	1
Cerro	group_1789		hypothetical protein	23	33	0	22	100	40	inf	0.000169568	0.839021	0.000797549	1	1	0	1	1
Cerro	group_1799		hypothetical protein	23	33	0	22	100	40	inf	0.000169568	0.839021	0.000797549	1	1	0	1	1
Cerro	group_1800		hypothetical protein	23	33	0	22	100	40	inf	0.000169568	0.839021	0.000797549	1	1	0	1	1
Cerro	yfcR_2		putative fimbrial-like protein YfcR	23	33	0	22	100	40	inf	0.000169568	0.839021	0.000797549	1	1	0	1	1
Cerro	yfcS_2		putative fimbrial chaperone YfcS	23	33	0	22	100	40	inf	0.000169568	0.839021	0.000797549	1	1	0	1	1
Cerro	smfA		Fimbria A protein	23	33	0	22	100	40	inf	0.000169568	0.839021	0.000797549	1	1	0	1	1
Cerro	nlhH		Carboxylesterase NlhH	23	33	0	22	100	40	inf	0.000169568	0.839021	0.000797549	1	1	0	1	1
Cerro	ynfE_2		Putative dimethyl sulfoxide reductase chain YnfE	23	33	0	22	100	40	inf	0.000169568	0.839021	0.000797549	1	1	0	1	1
Cerro	group_233		hypothetical protein	23	33	0	22	100	40	inf	0.000169568	0.839021	0.000797549	1	1	0	1	1
Cerro	group_2738		hypothetical protein	23	33	0	22	100	40	inf	0.000169568	0.839021	0.000797549	1	1	0	1	1
Cerro	group_2739		hypothetical protein	23	33	0	22	100	40	inf	0.000169568	0.839021	0.000797549	1	1	0	1	1
Cerro	group_2775		hypothetical protein	23	33	0	22	100	40	inf	0.000169568	0.839021	0.000797549	1	1	0	1	1
Cerro	group_2825		hypothetical protein	23	33	0	22	100	40	inf	0.000169568	0.839021	0.000797549	1	1	0	1	1
Cerro	group_2826		hypothetical protein	23	33	0	22	100	40	inf	0.000169568	0.839021	0.000797549	1	1	0	1	1
Cerro	group_2986		hypothetical protein	23	33	0	22	100	40	inf	0.000169568	0.839021	0.000797549	1	1	0	1	1
Cerro	group_3005		hypothetical protein	23	33	0	22	100	40	inf	0.000169568	0.839021	0.000797549	1	1	0	1	1
Cerro	papC_3		Outer membrane usher protein PapC	23	33	0	22	100	40	inf	0.000169568	0.839021	0.000797549	1	1	0	1	1
Cerro	folK		2-amino-4-hydroxy-6-hydroxymethyldihydropteridine pyrophosphokinase	23	33	0	22	100	40	inf	0.000169568	0.839021	0.000797549	1	1	0	1	1
Cerro	group_1053		hypothetical protein	23	34	0	21	100	38.1818	inf	0.000186986	0.925206	0.000797591	1	1	0	1	1
Cerro	ttdA_1		L(+)-tartrate dehydratase subunit alpha	23	34	0	21	100	38.1818	inf	0.000186986	0.925206	0.000797591	1	1	0	1	1
Cerro	group_1098	citG_1	2-(5''-triphosphoribosyl)-3'-dephosphocoenzyme-A synthase	23	34	0	21	100	38.1818	inf	0.000186986	0.925206	0.000797591	1	1	0	1	1
Cerro	group_1127		hypothetical protein	23	34	0	21	100	38.1818	inf	0.000186986	0.925206	0.000797591	1	1	0	1	1
Cerro	group_1410		hypothetical protein	23	34	0	21	100	38.1818	inf	0.000186986	0.925206	0.000797591	1	1	0	1	1
Cerro	group_1783		hypothetical protein	23	34	0	21	100	38.1818	inf	0.000186986	0.925206	0.000797591	1	1	0	1	1
Cerro	group_1787		hypothetical protein	23	34	0	21	100	38.1818	inf	0.000186986	0.925206	0.000797591	1	1	0	1	1
Cerro	group_1829		hypothetical protein	23	34	0	21	100	38.1818	inf	0.000186986	0.925206	0.000797591	1	1	0	1	1
Cerro	group_1848		hypothetical protein	23	34	0	21	100	38.1818	inf	0.000186986	0.925206	0.000797591	1	1	0	1	1
Cerro	ompN_1		Outer membrane porin N	23	34	0	21	100	38.1818	inf	0.000186986	0.925206	0.000797591	1	1	0	1	1
Cerro	group_1985		hypothetical protein	23	34	0	21	100	38.1818	inf	0.000186986	0.925206	0.000797591	1	1	0	1	1
Cerro	group_232		hypothetical protein	23	34	0	21	100	38.1818	inf	0.000186986	0.925206	0.000797591	1	1	0	1	1
Cerro	group_2328		hypothetical protein	23	34	0	21	100	38.1818	inf	0.000186986	0.925206	0.000797591	1	1	0	1	1
Cerro	group_234		hypothetical protein	23	34	0	21	100	38.1818	inf	0.000186986	0.925206	0.000797591	1	1	0	1	1
Cerro	pabC		Aminodeoxychorismate lyase	23	34	0	21	100	38.1818	inf	0.000186986	0.925206	0.000797591	1	1	0	1	1
Cerro	ynfM_2		Inner membrane transport protein YnfM	23	34	0	21	100	38.1818	inf	0.000186986	0.925206	0.000797591	1	1	0	1	1
Cerro	leuD		3-isopropylmalate dehydratase small subunit	23	34	0	21	100	38.1818	inf	0.000186986	0.925206	0.000797591	1	1	0	1	1
Cerro	group_2770		hypothetical protein	23	34	0	21	100	38.1818	inf	0.000186986	0.925206	0.000797591	1	1	0	1	1
Cerro	dehH1		Haloacetate dehalogenase H-1	23	34	0	21	100	38.1818	inf	0.000186986	0.925206	0.000797591	1	1	0	1	1
Cerro	group_2772	dmlR_3	HTH-type transcriptional regulator DmlR	23	34	0	21	100	38.1818	inf	0.000186986	0.925206	0.000797591	1	1	0	1	1
Cerro	group_2773		hypothetical protein	23	34	0	21	100	38.1818	inf	0.000186986	0.925206	0.000797591	1	1	0	1	1
Cerro	fumB_1		Fumarate hydratase class I, anaerobic	23	34	0	21	100	38.1818	inf	0.000186986	0.925206	0.000797591	1	1	0	1	1
Cerro	cynR_2		HTH-type transcriptional regulator CynR	23	34	0	21	100	38.1818	inf	0.000186986	0.925206	0.000797591	1	1	0	1	1
Cerro	yjiE_2		HTH-type transcriptional regulator YjiE	23	34	0	21	100	38.1818	inf	0.000186986	0.925206	0.000797591	1	1	0	1	1
Cerro	group_2830		hypothetical protein	23	34	0	21	100	38.1818	inf	0.000186986	0.925206	0.000797591	1	1	0	1	1
Cerro	gudP_2		putative glucarate transporter	23	34	0	21	100	38.1818	inf	0.000186986	0.925206	0.000797591	1	1	0	1	1
Cerro	group_2901		L-talarate/galactarate dehydratase	23	34	0	21	100	38.1818	inf	0.000186986	0.925206	0.000797591	1	1	0	1	1
Cerro	gntR_4		HTH-type transcriptional regulator GntR	23	34	0	21	100	38.1818	inf	0.000186986	0.925206	0.000797591	1	1	0	1	1
Cerro	COQ3		Ubiquinone biosynthesis O-methyltransferase, mitochondrial	23	34	0	21	100	38.1818	inf	0.000186986	0.925206	0.000797591	1	1	0	1	1
Cerro	sipD		Cell invasion protein SipD	23	34	0	21	100	38.1818	inf	0.000186986	0.925206	0.000797591	1	1	0	1	1
Cerro	group_356		hypothetical protein	23	34	0	21	100	38.1818	inf	0.000186986	0.925206	0.000797591	1	1	0	1	1
Cerro	group_386		hypothetical protein	23	34	0	21	100	38.1818	inf	0.000186986	0.925206	0.000797591	1	1	0	1	1
Cerro	leuC		3-isopropylmalate dehydratase large subunit	23	34	0	21	100	38.1818	inf	0.000186986	0.925206	0.000797591	1	1	0	1	1
Cerro	group_591		hypothetical protein	23	34	0	21	100	38.1818	inf	0.000186986	0.925206	0.000797591	1	1	0	1	1
Cerro	fimD_2		Outer membrane usher protein FimD	23	34	0	21	100	38.1818	inf	0.000186986	0.925206	0.000797591	1	1	0	1	1
Cerro	group_127		hypothetical protein	23	35	0	20	100	36.3636	inf	0.000385149	1	0.00162189	1	1	0	1	1
Cerro	group_1459		hypothetical protein	23	35	0	20	100	36.3636	inf	0.000385149	1	0.00162189	1	1	0	1	1
Cerro	yfdG		Prophage bactoprenol-linked glucose translocase	23	35	0	20	100	36.3636	inf	0.000385149	1	0.00162189	1	1	0	1	1
Cerro	pdeF_1		Cyclic di-GMP phosphodiesterase PdeF	6	0	17	55	26.087	100	inf	0.000393017	1	0.00164522	1	1	0	1	1
Cerro	gmd_2		GDP-mannose 4,6-dehydratase	6	0	17	55	26.087	100	inf	0.000393017	1	0.00164522	1	1	0	1	1
Cerro	oadB_1		Oxaloacetate decarboxylase beta chain	22	31	1	24	95.6522	43.6364	17.0323	0.000447082	1	0.00186838	1	1	1	1	1
Cerro	group_958		hypothetical protein	13	9	10	46	56.5217	83.6364	6.64444	0.00068293	1	0.00285159	1	1	1	1	1
Cerro	group_1910		hypothetical protein	23	36	0	19	100	34.5455	inf	0.000880629	1	0.00354641	1	1	0	1	1
Cerro	group_209		hypothetical protein	23	36	0	19	100	34.5455	inf	0.000880629	1	0.00354641	1	1	0	1	1
Cerro	ompD		Outer membrane porin protein OmpD	23	36	0	19	100	34.5455	inf	0.000880629	1	0.00354641	1	1	0	1	1
Cerro	group_2301		hypothetical protein	23	36	0	19	100	34.5455	inf	0.000880629	1	0.00354641	1	1	0	1	1
Cerro	rihC		Non-specific ribonucleoside hydrolase RihC	23	36	0	19	100	34.5455	inf	0.000880629	1	0.00354641	1	1	0	1	1
Cerro	group_566		hypothetical protein	23	36	0	19	100	34.5455	inf	0.000880629	1	0.00354641	1	1	0	1	1
Cerro	group_1126		hypothetical protein	23	37	0	18	100	32.7273	inf	0.000882302	1	0.00354641	1	1	0	1	1
Cerro	dppA		Periplasmic dipeptide transport protein	23	37	0	18	100	32.7273	inf	0.000882302	1	0.00354641	1	1	0	1	1
Cerro	wzzB_1		Chain length determinant protein	5	0	18	55	21.7391	100	inf	0.0015939	1	0.00639111	1	1	0	1	1
Cerro	group_84		hypothetical protein	5	0	18	55	21.7391	100	inf	0.0015939	1	0.00639111	1	1	0	1	1
Cerro	group_1581		hypothetical protein	23	38	0	17	100	30.9091	inf	0.00179452	1	0.00698607	1	1	0	1	1
Cerro	ptsH_1		Phosphocarrier protein HPr	23	38	0	17	100	30.9091	inf	0.00179452	1	0.00698607	1	1	0	1	1
Cerro	lacC_1		Tagatose-6-phosphate kinase	23	38	0	17	100	30.9091	inf	0.00179452	1	0.00698607	1	1	0	1	1
Cerro	gatY		D-tagatose-1,6-bisphosphate aldolase subunit GatY	23	38	0	17	100	30.9091	inf	0.00179452	1	0.00698607	1	1	0	1	1
Cerro	group_2447		hypothetical protein	23	38	0	17	100	30.9091	inf	0.00179452	1	0.00698607	1	1	0	1	1
Cerro	group_2448		Tagatose kinase	23	38	0	17	100	30.9091	inf	0.00179452	1	0.00698607	1	1	0	1	1
Cerro	fba		Fructose-bisphosphate aldolase	23	38	0	17	100	30.9091	inf	0.00179452	1	0.00698607	1	1	0	1	1
Cerro	glpK_1		Glycerol kinase	23	38	0	17	100	30.9091	inf	0.00179452	1	0.00698607	1	1	0	1	1
Cerro	gatC_3		PTS system galactitol-specific EIIC component	23	38	0	17	100	30.9091	inf	0.00179452	1	0.00698607	1	1	0	1	1
Cerro	gatB_3		PTS system galactitol-specific EIIB component	23	38	0	17	100	30.9091	inf	0.00179452	1	0.00698607	1	1	0	1	1
Cerro	group_2590		hypothetical protein	23	38	0	17	100	30.9091	inf	0.00179452	1	0.00698607	1	1	0	1	1
Cerro	mngR_1		Mannosyl-D-glycerate transport/metabolism system repressor MngR	23	38	0	17	100	30.9091	inf	0.00179452	1	0.00698607	1	1	0	1	1
Cerro	fruA_1		PTS system fructose-specific EIIABC component	23	38	0	17	100	30.9091	inf	0.00179452	1	0.00698607	1	1	0	1	1
Cerro	rhaS_2		HTH-type transcriptional activator RhaS	23	39	0	16	100	29.0909	inf	0.00203186	1	0.00771575	1	1	0	1	1
Cerro	tuf1_1		Elongation factor Tu 1	23	39	0	16	100	29.0909	inf	0.00203186	1	0.00771575	1	1	0	1	1
Cerro	group_173		hypothetical protein	23	39	0	16	100	29.0909	inf	0.00203186	1	0.00771575	1	1	0	1	1
Cerro	ccmF_1		Cytochrome c-type biogenesis protein CcmF	23	39	0	16	100	29.0909	inf	0.00203186	1	0.00771575	1	1	0	1	1
Cerro	group_461		hypothetical protein	23	39	0	16	100	29.0909	inf	0.00203186	1	0.00771575	1	1	0	1	1
Cerro	group_142		hypothetical protein	9	5	14	50	39.1304	90.9091	6.42857	0.00319473	1	0.0121223	1	1	1	1	1
Cerro	group_1004		hypothetical protein	23	40	0	15	100	27.2727	inf	0.00374961	1	0.013503	1	1	0	1	1
Cerro	yopJ		Effector protein YopJ	23	40	0	15	100	27.2727	inf	0.00374961	1	0.013503	1	1	0	1	1
Cerro	cdaR_1		Carbohydrate diacid regulator	23	40	0	15	100	27.2727	inf	0.00374961	1	0.013503	1	1	0	1	1
Cerro	gntP		High-affinity gluconate transporter	23	40	0	15	100	27.2727	inf	0.00374961	1	0.013503	1	1	0	1	1
Cerro	bamA		Outer membrane protein assembly factor BamA	23	40	0	15	100	27.2727	inf	0.00374961	1	0.013503	1	1	0	1	1
Cerro	yecD		Isochorismatase family protein YecD	23	40	0	15	100	27.2727	inf	0.00374961	1	0.013503	1	1	0	1	1
Cerro	group_289		hypothetical protein	10	7	13	48	43.4783	87.2727	5.27473	0.00549583	1	0.0197626	1	1	1	1	1
Cerro	group_1166		hypothetical protein	4	0	19	55	17.3913	100	inf	0.00620783	1	0.0221619	1	1	0	1	1
Cerro	group_2038		hypothetical protein	4	0	19	55	17.3913	100	inf	0.00620783	1	0.0221619	1	1	0	1	1
Cerro	group_2135		hypothetical protein	4	0	19	55	17.3913	100	inf	0.00620783	1	0.0221619	1	1	0	1	1
Cerro	group_252		hypothetical protein	4	0	19	55	17.3913	100	inf	0.00620783	1	0.0221619	1	1	0	1	1
Cerro	ydfJ_1		Putative transporter YdfJ	4	0	19	55	17.3913	100	inf	0.00620783	1	0.0221619	1	1	0	1	1
Cerro	cfa_2		Cyclopropane-fatty-acyl-phospholipid synthase	4	0	19	55	17.3913	100	inf	0.00620783	1	0.0221619	1	1	0	1	1
Cerro	group_837	lysA_2	Diaminopimelate decarboxylase	4	0	19	55	17.3913	100	inf	0.00620783	1	0.0221619	1	1	0	1	1
Cerro	group_129		hypothetical protein	23	41	0	14	100	25.4545	inf	0.00744737	1	0.0256256	1	1	0	1	1
Cerro	group_182		hypothetical protein	23	41	0	14	100	25.4545	inf	0.00744737	1	0.0256256	1	1	0	1	1
Cerro	group_1877		hypothetical protein	23	41	0	14	100	25.4545	inf	0.00744737	1	0.0256256	1	1	0	1	1
Cerro	ykgO		50S ribosomal protein L36 2	23	41	0	14	100	25.4545	inf	0.00744737	1	0.0256256	1	1	0	1	1
Cerro	group_3024		hypothetical protein	23	41	0	14	100	25.4545	inf	0.00744737	1	0.0256256	1	1	0	1	1
Cerro	hemW_2		Heme chaperone HemW	23	41	0	14	100	25.4545	inf	0.00744737	1	0.0256256	1	1	0	1	1
Cerro	group_753		hypothetical protein	23	41	0	14	100	25.4545	inf	0.00744737	1	0.0256256	1	1	0	1	1
Cerro	group_1562		hypothetical protein	23	42	0	13	100	23.6364	inf	0.00799103	1	0.026116	1	1	0	1	1
Cerro	group_221		hypothetical protein	23	42	0	13	100	23.6364	inf	0.00799103	1	0.026116	1	1	0	1	1
Cerro	group_3270		hypothetical protein	23	42	0	13	100	23.6364	inf	0.00799103	1	0.026116	1	1	0	1	1
Cerro	group_334		hypothetical protein	18	26	5	29	78.2609	52.7273	4.01538	0.0135399	1	0.0441923	1	1	1	1	1
Cerro	group_7	oadA_2	Oxaloacetate decarboxylase alpha chain	9	7	14	48	39.1304	87.2727	4.40816	0.0136023	1	0.0443667	1	1	1	1	1
Cerro	yihP_2		Putative 2,3-dihydroxypropane-1-sulfonate exporter	23	43	0	12	100	21.8182	inf	0.0144866	1	0.0461557	1	1	0	1	1
Cerro	yihR		putative protein YihR	23	43	0	12	100	21.8182	inf	0.0144866	1	0.0461557	1	1	0	1	1
Cerro	group_1763		hypothetical protein	23	43	0	12	100	21.8182	inf	0.0144866	1	0.0461557	1	1	0	1	1
Cerro	group_2332		hypothetical protein	23	43	0	12	100	21.8182	inf	0.0144866	1	0.0461557	1	1	0	1	1
Cerro	group_2333		hypothetical protein	23	43	0	12	100	21.8182	inf	0.0144866	1	0.0461557	1	1	0	1	1
Cerro	glcR_3		HTH-type transcriptional repressor GlcR	23	43	0	12	100	21.8182	inf	0.0144866	1	0.0461557	1	1	0	1	1
Cerro	yihP_1		Putative 2,3-dihydroxypropane-1-sulfonate exporter	23	43	0	12	100	21.8182	inf	0.0144866	1	0.0461557	1	1	0	1	1
Cerro	yidA_1		Sugar phosphatase YidA	23	43	0	12	100	21.8182	inf	0.0144866	1	0.0461557	1	1	0	1	1
Cerro	group_353		hypothetical protein	23	43	0	12	100	21.8182	inf	0.0144866	1	0.0461557	1	1	0	1	1
Cerro	yqjH		NADPH-dependent ferric-chelate reductase	23	43	0	12	100	21.8182	inf	0.0144866	1	0.0461557	1	1	0	1	1
Enteritidis	group_100		hypothetical protein	2	0	0	76	100	100	inf	0.000333	1	0.0163137	1	1	0	1	1
Enteritidis	group_1034	yihP_1	Putative 2,3-dihydroxypropane-1-sulfonate exporter	2	0	0	76	100	100	inf	0.000333	1	0.0163137	1	1	0	1	1
Enteritidis	group_1052	fixB_2	Protein FixB	2	0	0	76	100	100	inf	0.000333	1	0.0163137	1	1	0	1	1
Enteritidis	group_1064		hypothetical protein	2	0	0	76	100	100	inf	0.000333	1	0.0163137	1	1	0	1	1
Enteritidis	dsbA_2		Thiol:disulfide interchange protein DsbA	2	0	0	76	100	100	inf	0.000333	1	0.0163137	1	1	0	1	1
Enteritidis	group_1861		hypothetical protein	2	0	0	76	100	100	inf	0.000333	1	0.0163137	1	1	0	1	1
Enteritidis	group_2058		hypothetical protein	2	0	0	76	100	100	inf	0.000333	1	0.0163137	1	1	0	1	1
Enteritidis	group_243		hypothetical protein	2	0	0	76	100	100	inf	0.000333	1	0.0163137	1	1	0	1	1
Enteritidis	group_244		hypothetical protein	2	0	0	76	100	100	inf	0.000333	1	0.0163137	1	1	0	1	1
Enteritidis	cmpR_2		HTH-type transcriptional activator CmpR	2	0	0	76	100	100	inf	0.000333	1	0.0163137	1	1	0	1	1
Enteritidis	group_4090	intQ	Putative defective protein IntQ	2	0	0	76	100	100	inf	0.000333	1	0.0163137	1	1	0	1	1
Enteritidis	group_4091		hypothetical protein	2	0	0	76	100	100	inf	0.000333	1	0.0163137	1	1	0	1	1
Enteritidis	group_4092		hypothetical protein	2	0	0	76	100	100	inf	0.000333	1	0.0163137	1	1	0	1	1
Enteritidis	group_4093	kilR	Killing protein KilR	2	0	0	76	100	100	inf	0.000333	1	0.0163137	1	1	0	1	1
Enteritidis	group_4094		hypothetical protein	2	0	0	76	100	100	inf	0.000333	1	0.0163137	1	1	0	1	1
Enteritidis	ydfB		putative protein YdfB	2	0	0	76	100	100	inf	0.000333	1	0.0163137	1	1	0	1	1
Enteritidis	group_4096		hypothetical protein	2	0	0	76	100	100	inf	0.000333	1	0.0163137	1	1	0	1	1
Enteritidis	group_4097		hypothetical protein	2	0	0	76	100	100	inf	0.000333	1	0.0163137	1	1	0	1	1
Enteritidis	group_4098		hypothetical protein	2	0	0	76	100	100	inf	0.000333	1	0.0163137	1	1	0	1	1
Enteritidis	group_4099		hypothetical protein	2	0	0	76	100	100	inf	0.000333	1	0.0163137	1	1	0	1	1
Enteritidis	group_4100		hypothetical protein	2	0	0	76	100	100	inf	0.000333	1	0.0163137	1	1	0	1	1
Enteritidis	group_4101		hypothetical protein	2	0	0	76	100	100	inf	0.000333	1	0.0163137	1	1	0	1	1
Enteritidis	group_4102		hypothetical protein	2	0	0	76	100	100	inf	0.000333	1	0.0163137	1	1	0	1	1
Enteritidis	group_4103		hypothetical protein	2	0	0	76	100	100	inf	0.000333	1	0.0163137	1	1	0	1	1
Enteritidis	group_4104	ybcO	Putative nuclease YbcO	2	0	0	76	100	100	inf	0.000333	1	0.0163137	1	1	0	1	1
Enteritidis	group_4105		hypothetical protein	2	0	0	76	100	100	inf	0.000333	1	0.0163137	1	1	0	1	1
Enteritidis	group_4106		hypothetical protein	2	0	0	76	100	100	inf	0.000333	1	0.0163137	1	1	0	1	1
Enteritidis	group_4107		hypothetical protein	2	0	0	76	100	100	inf	0.000333	1	0.0163137	1	1	0	1	1
Enteritidis	group_4108		hypothetical protein	2	0	0	76	100	100	inf	0.000333	1	0.0163137	1	1	0	1	1
Enteritidis	group_4109		hypothetical protein	2	0	0	76	100	100	inf	0.000333	1	0.0163137	1	1	0	1	1
Enteritidis	group_4115		hypothetical protein	2	0	0	76	100	100	inf	0.000333	1	0.0163137	1	1	0	1	1
Enteritidis	group_4116		hypothetical protein	2	0	0	76	100	100	inf	0.000333	1	0.0163137	1	1	0	1	1
Enteritidis	group_4117	xerC_1	Tyrosine recombinase XerC	2	0	0	76	100	100	inf	0.000333	1	0.0163137	1	1	0	1	1
Enteritidis	group_4118		hypothetical protein	2	0	0	76	100	100	inf	0.000333	1	0.0163137	1	1	0	1	1
Enteritidis	group_4120		hypothetical protein	2	0	0	76	100	100	inf	0.000333	1	0.0163137	1	1	0	1	1
Enteritidis	group_4121		hypothetical protein	2	0	0	76	100	100	inf	0.000333	1	0.0163137	1	1	0	1	1
Enteritidis	group_4123		hypothetical protein	2	0	0	76	100	100	inf	0.000333	1	0.0163137	1	1	0	1	1
Enteritidis	group_4124		hypothetical protein	2	0	0	76	100	100	inf	0.000333	1	0.0163137	1	1	0	1	1
Enteritidis	group_4125		hypothetical protein	2	0	0	76	100	100	inf	0.000333	1	0.0163137	1	1	0	1	1
Enteritidis	group_4126		hypothetical protein	2	0	0	76	100	100	inf	0.000333	1	0.0163137	1	1	0	1	1
Enteritidis	group_4127		hypothetical protein	2	0	0	76	100	100	inf	0.000333	1	0.0163137	1	1	0	1	1
Enteritidis	group_4128		hypothetical protein	2	0	0	76	100	100	inf	0.000333	1	0.0163137	1	1	0	1	1
Enteritidis	group_4129		hypothetical protein	2	0	0	76	100	100	inf	0.000333	1	0.0163137	1	1	0	1	1
Enteritidis	group_4130		hypothetical protein	2	0	0	76	100	100	inf	0.000333	1	0.0163137	1	1	0	1	1
Enteritidis	group_4133		hypothetical protein	2	0	0	76	100	100	inf	0.000333	1	0.0163137	1	1	0	1	1
Enteritidis	group_4136		hypothetical protein	2	0	0	76	100	100	inf	0.000333	1	0.0163137	1	1	0	1	1
Enteritidis	group_4137		hypothetical protein	2	0	0	76	100	100	inf	0.000333	1	0.0163137	1	1	0	1	1
Enteritidis	group_4138		hypothetical protein	2	0	0	76	100	100	inf	0.000333	1	0.0163137	1	1	0	1	1
Enteritidis	group_4139		hypothetical protein	2	0	0	76	100	100	inf	0.000333	1	0.0163137	1	1	0	1	1
Enteritidis	traA		Pilin	2	0	0	76	100	100	inf	0.000333	1	0.0163137	1	1	0	1	1
Enteritidis	traY		Relaxosome protein TraY	2	0	0	76	100	100	inf	0.000333	1	0.0163137	1	1	0	1	1
Enteritidis	traJ		Protein TraJ	2	0	0	76	100	100	inf	0.000333	1	0.0163137	1	1	0	1	1
Enteritidis	traM		Relaxosome protein TraM	2	0	0	76	100	100	inf	0.000333	1	0.0163137	1	1	0	1	1
Enteritidis	group_4144		hypothetical protein	2	0	0	76	100	100	inf	0.000333	1	0.0163137	1	1	0	1	1
Enteritidis	group_4145		hypothetical protein	2	0	0	76	100	100	inf	0.000333	1	0.0163137	1	1	0	1	1
Enteritidis	group_4146		hypothetical protein	2	0	0	76	100	100	inf	0.000333	1	0.0163137	1	1	0	1	1
Enteritidis	group_4147		hypothetical protein	2	0	0	76	100	100	inf	0.000333	1	0.0163137	1	1	0	1	1
Enteritidis	group_4148		hypothetical protein	2	0	0	76	100	100	inf	0.000333	1	0.0163137	1	1	0	1	1
Enteritidis	group_4149		hypothetical protein	2	0	0	76	100	100	inf	0.000333	1	0.0163137	1	1	0	1	1
Enteritidis	group_4150	umuD	Protein UmuD	2	0	0	76	100	100	inf	0.000333	1	0.0163137	1	1	0	1	1
Enteritidis	group_4151	umuC_2	Protein UmuC	2	0	0	76	100	100	inf	0.000333	1	0.0163137	1	1	0	1	1
Enteritidis	virB		Virulence regulon transcriptional activator VirB	2	0	0	76	100	100	inf	0.000333	1	0.0163137	1	1	0	1	1
Enteritidis	parA		Plasmid partition protein A	2	0	0	76	100	100	inf	0.000333	1	0.0163137	1	1	0	1	1
Enteritidis	group_4154		hypothetical protein	2	0	0	76	100	100	inf	0.000333	1	0.0163137	1	1	0	1	1
Enteritidis	group_4155		hypothetical protein	2	0	0	76	100	100	inf	0.000333	1	0.0163137	1	1	0	1	1
Enteritidis	pdeL		Cyclic di-GMP phosphodiesterase PdeL	2	0	0	76	100	100	inf	0.000333	1	0.0163137	1	1	0	1	1
Enteritidis	group_4157		hypothetical protein	2	0	0	76	100	100	inf	0.000333	1	0.0163137	1	1	0	1	1
Enteritidis	repB		RepFIB replication protein A	2	0	0	76	100	100	inf	0.000333	1	0.0163137	1	1	0	1	1
Enteritidis	group_4159		hypothetical protein	2	0	0	76	100	100	inf	0.000333	1	0.0163137	1	1	0	1	1
Enteritidis	group_4160	papB	Major pilu subunit operon regulatory protein PapB	2	0	0	76	100	100	inf	0.000333	1	0.0163137	1	1	0	1	1
Enteritidis	group_4161		hypothetical protein	2	0	0	76	100	100	inf	0.000333	1	0.0163137	1	1	0	1	1
Enteritidis	fimD_4		Outer membrane usher protein FimD	2	0	0	76	100	100	inf	0.000333	1	0.0163137	1	1	0	1	1
Enteritidis	group_4163	faeE	Chaperone protein FaeE	2	0	0	76	100	100	inf	0.000333	1	0.0163137	1	1	0	1	1
Enteritidis	group_4164		hypothetical protein	2	0	0	76	100	100	inf	0.000333	1	0.0163137	1	1	0	1	1
Enteritidis	group_4165		hypothetical protein	2	0	0	76	100	100	inf	0.000333	1	0.0163137	1	1	0	1	1
Enteritidis	group_4166		hypothetical protein	2	0	0	76	100	100	inf	0.000333	1	0.0163137	1	1	0	1	1
Enteritidis	group_4167		hypothetical protein	2	0	0	76	100	100	inf	0.000333	1	0.0163137	1	1	0	1	1
Enteritidis	group_4168		hypothetical protein	2	0	0	76	100	100	inf	0.000333	1	0.0163137	1	1	0	1	1
Enteritidis	finO		Fertility inhibition protein	2	0	0	76	100	100	inf	0.000333	1	0.0163137	1	1	0	1	1
Enteritidis	group_4170		hypothetical protein	2	0	0	76	100	100	inf	0.000333	1	0.0163137	1	1	0	1	1
Enteritidis	group_4171		hypothetical protein	2	0	0	76	100	100	inf	0.000333	1	0.0163137	1	1	0	1	1
Enteritidis	group_4172		hypothetical protein	2	0	0	76	100	100	inf	0.000333	1	0.0163137	1	1	0	1	1
Enteritidis	group_4173		hypothetical protein	2	0	0	76	100	100	inf	0.000333	1	0.0163137	1	1	0	1	1
Enteritidis	ail_4		Attachment invasion locus protein	2	0	0	76	100	100	inf	0.000333	1	0.0163137	1	1	0	1	1
Enteritidis	group_4175		hypothetical protein	2	0	0	76	100	100	inf	0.000333	1	0.0163137	1	1	0	1	1
Enteritidis	group_4176	rcsB_2	Transcriptional regulatory protein RcsB	2	0	0	76	100	100	inf	0.000333	1	0.0163137	1	1	0	1	1
Enteritidis	agp_2		Glucose-1-phosphatase	2	0	0	76	100	100	inf	0.000333	1	0.0163137	1	1	0	1	1
Enteritidis	group_644		hypothetical protein	2	0	0	76	100	100	inf	0.000333	1	0.0163137	1	1	0	1	1
Enteritidis	pduE_2		Propanediol dehydratase small subunit	2	0	0	76	100	100	inf	0.000333	1	0.0163137	1	1	0	1	1
Enteritidis	group_1063		hypothetical protein	2	1	0	75	100	98.6842	inf	0.000999001	1	0.0289068	1	1	0	1	1
Enteritidis	group_1773		hypothetical protein	2	1	0	75	100	98.6842	inf	0.000999001	1	0.0289068	1	1	0	1	1
Enteritidis	group_1774		hypothetical protein	2	1	0	75	100	98.6842	inf	0.000999001	1	0.0289068	1	1	0	1	1
Enteritidis	group_1807		hypothetical protein	2	1	0	75	100	98.6842	inf	0.000999001	1	0.0289068	1	1	0	1	1
Enteritidis	group_1879		hypothetical protein	2	1	0	75	100	98.6842	inf	0.000999001	1	0.0289068	1	1	0	1	1
Enteritidis	group_1880		IS200/IS605 family transposase ISEc46	2	1	0	75	100	98.6842	inf	0.000999001	1	0.0289068	1	1	0	1	1
Enteritidis	pld		hypothetical protein	2	1	0	75	100	98.6842	inf	0.000999001	1	0.0289068	1	1	0	1	1
Enteritidis	group_1885	tfaE_2	hypothetical protein	2	1	0	75	100	98.6842	inf	0.000999001	1	0.0289068	1	1	0	1	1
Enteritidis	group_1975		hypothetical protein	2	1	0	75	100	98.6842	inf	0.000999001	1	0.0289068	1	1	0	1	1
Enteritidis	group_2057	cusS	Sensor histidine kinase CusS	2	1	0	75	100	98.6842	inf	0.000999001	1	0.0289068	1	1	0	1	1
Enteritidis	group_240		hypothetical protein	2	1	0	75	100	98.6842	inf	0.000999001	1	0.0289068	1	1	0	1	1
Enteritidis	group_2719		hypothetical protein	2	1	0	75	100	98.6842	inf	0.000999001	1	0.0289068	1	1	0	1	1
Enteritidis	group_2721		hypothetical protein	2	1	0	75	100	98.6842	inf	0.000999001	1	0.0289068	1	1	0	1	1
Enteritidis	group_2722		hypothetical protein	2	1	0	75	100	98.6842	inf	0.000999001	1	0.0289068	1	1	0	1	1
Enteritidis	group_2724		hypothetical protein	2	1	0	75	100	98.6842	inf	0.000999001	1	0.0289068	1	1	0	1	1
Enteritidis	group_2725		hypothetical protein	2	1	0	75	100	98.6842	inf	0.000999001	1	0.0289068	1	1	0	1	1
Enteritidis	group_2726		hypothetical protein	2	1	0	75	100	98.6842	inf	0.000999001	1	0.0289068	1	1	0	1	1
Enteritidis	group_2728		hypothetical protein	2	1	0	75	100	98.6842	inf	0.000999001	1	0.0289068	1	1	0	1	1
Enteritidis	group_2729		hypothetical protein	2	1	0	75	100	98.6842	inf	0.000999001	1	0.0289068	1	1	0	1	1
Enteritidis	group_2730		hypothetical protein	2	1	0	75	100	98.6842	inf	0.000999001	1	0.0289068	1	1	0	1	1
Enteritidis	group_2731		hypothetical protein	2	1	0	75	100	98.6842	inf	0.000999001	1	0.0289068	1	1	0	1	1
Enteritidis	group_2732		hypothetical protein	2	1	0	75	100	98.6842	inf	0.000999001	1	0.0289068	1	1	0	1	1
Enteritidis	group_2733		hypothetical protein	2	1	0	75	100	98.6842	inf	0.000999001	1	0.0289068	1	1	0	1	1
Enteritidis	group_2734		hypothetical protein	2	1	0	75	100	98.6842	inf	0.000999001	1	0.0289068	1	1	0	1	1
Enteritidis	hns_2		DNA-binding protein H-NS	2	1	0	75	100	98.6842	inf	0.000999001	1	0.0289068	1	1	0	1	1
Enteritidis	group_2736		hypothetical protein	2	1	0	75	100	98.6842	inf	0.000999001	1	0.0289068	1	1	0	1	1
Enteritidis	group_2766	intA_2	Prophage integrase IntA	2	1	0	75	100	98.6842	inf	0.000999001	1	0.0289068	1	1	0	1	1
Enteritidis	group_2767		hypothetical protein	2	1	0	75	100	98.6842	inf	0.000999001	1	0.0289068	1	1	0	1	1
Enteritidis	group_2861		hypothetical protein	2	1	0	75	100	98.6842	inf	0.000999001	1	0.0289068	1	1	0	1	1
Enteritidis	group_2914		hypothetical protein	2	1	0	75	100	98.6842	inf	0.000999001	1	0.0289068	1	1	0	1	1
Enteritidis	group_2915		hypothetical protein	2	1	0	75	100	98.6842	inf	0.000999001	1	0.0289068	1	1	0	1	1
Enteritidis	group_2948		hypothetical protein	2	1	0	75	100	98.6842	inf	0.000999001	1	0.0289068	1	1	0	1	1
Enteritidis	group_2977		hypothetical protein	2	1	0	75	100	98.6842	inf	0.000999001	1	0.0289068	1	1	0	1	1
Enteritidis	group_3069		hypothetical protein	2	1	0	75	100	98.6842	inf	0.000999001	1	0.0289068	1	1	0	1	1
Enteritidis	group_3070		hypothetical protein	2	1	0	75	100	98.6842	inf	0.000999001	1	0.0289068	1	1	0	1	1
Enteritidis	group_3071	smc	Chromosome partition protein Smc	2	1	0	75	100	98.6842	inf	0.000999001	1	0.0289068	1	1	0	1	1
Enteritidis	group_3072		hypothetical protein	2	1	0	75	100	98.6842	inf	0.000999001	1	0.0289068	1	1	0	1	1
Enteritidis	group_3073		hypothetical protein	2	1	0	75	100	98.6842	inf	0.000999001	1	0.0289068	1	1	0	1	1
Enteritidis	group_3074	hin_2	DNA-invertase hin	2	1	0	75	100	98.6842	inf	0.000999001	1	0.0289068	1	1	0	1	1
Enteritidis	group_3075		hypothetical protein	2	1	0	75	100	98.6842	inf	0.000999001	1	0.0289068	1	1	0	1	1
Enteritidis	group_3076		IS481 family transposase ISAzs36	2	1	0	75	100	98.6842	inf	0.000999001	1	0.0289068	1	1	0	1	1
Enteritidis	group_3077		IS630 family transposase ISEc33	2	1	0	75	100	98.6842	inf	0.000999001	1	0.0289068	1	1	0	1	1
Enteritidis	group_3078		hypothetical protein	2	1	0	75	100	98.6842	inf	0.000999001	1	0.0289068	1	1	0	1	1
Enteritidis	mkaC		Virulence genes transcriptional activator	2	1	0	75	100	98.6842	inf	0.000999001	1	0.0289068	1	1	0	1	1
Enteritidis	group_3080		hypothetical protein	2	1	0	75	100	98.6842	inf	0.000999001	1	0.0289068	1	1	0	1	1
Enteritidis	mkaB		28.1 kDa virulence protein	2	1	0	75	100	98.6842	inf	0.000999001	1	0.0289068	1	1	0	1	1
Enteritidis	group_3082		hypothetical protein	2	1	0	75	100	98.6842	inf	0.000999001	1	0.0289068	1	1	0	1	1
Enteritidis	spvB		Mono(ADP-ribosyl)transferase SpvB	2	1	0	75	100	98.6842	inf	0.000999001	1	0.0289068	1	1	0	1	1
Enteritidis	spvC		MAPK phosphothreonine lyase	2	1	0	75	100	98.6842	inf	0.000999001	1	0.0289068	1	1	0	1	1
Enteritidis	vsdE		Virulence protein vsdE	2	1	0	75	100	98.6842	inf	0.000999001	1	0.0289068	1	1	0	1	1
Enteritidis	group_3086		hypothetical protein	2	1	0	75	100	98.6842	inf	0.000999001	1	0.0289068	1	1	0	1	1
Enteritidis	group_3087		Invasin	2	1	0	75	100	98.6842	inf	0.000999001	1	0.0289068	1	1	0	1	1
Enteritidis	group_3088		hypothetical protein	2	1	0	75	100	98.6842	inf	0.000999001	1	0.0289068	1	1	0	1	1
Enteritidis	group_3090		hypothetical protein	2	1	0	75	100	98.6842	inf	0.000999001	1	0.0289068	1	1	0	1	1
Enteritidis	ccdB_2		Toxin CcdB	2	1	0	75	100	98.6842	inf	0.000999001	1	0.0289068	1	1	0	1	1
Enteritidis	group_3103		hypothetical protein	2	1	0	75	100	98.6842	inf	0.000999001	1	0.0289068	1	1	0	1	1
Enteritidis	group_3104		hypothetical protein	2	1	0	75	100	98.6842	inf	0.000999001	1	0.0289068	1	1	0	1	1
Enteritidis	group_3105		hypothetical protein	2	1	0	75	100	98.6842	inf	0.000999001	1	0.0289068	1	1	0	1	1
Enteritidis	sopE		Guanine nucleotide exchange factor SopE	2	1	0	75	100	98.6842	inf	0.000999001	1	0.0289068	1	1	0	1	1
Enteritidis	group_3136		hypothetical protein	2	1	0	75	100	98.6842	inf	0.000999001	1	0.0289068	1	1	0	1	1
Enteritidis	group_3137		hypothetical protein	2	1	0	75	100	98.6842	inf	0.000999001	1	0.0289068	1	1	0	1	1
Enteritidis	group_3138		hypothetical protein	2	1	0	75	100	98.6842	inf	0.000999001	1	0.0289068	1	1	0	1	1
Enteritidis	group_3149		hypothetical protein	2	1	0	75	100	98.6842	inf	0.000999001	1	0.0289068	1	1	0	1	1
Enteritidis	group_901	yhdJ	DNA adenine methyltransferase YhdJ	2	1	0	75	100	98.6842	inf	0.000999001	1	0.0289068	1	1	0	1	1
Give	group_1211		hypothetical protein	6	0	0	72	100	100	inf	3.8933e-09	1.9264e-05	1.0139e-07	1	1	0	1	1
Give	group_2092		hypothetical protein	6	0	0	72	100	100	inf	3.8933e-09	1.9264e-05	1.0139e-07	1	1	0	1	1
Give	group_261		hypothetical protein	6	0	0	72	100	100	inf	3.8933e-09	1.9264e-05	1.0139e-07	1	1	0	1	1
Give	group_292		hypothetical protein	6	0	0	72	100	100	inf	3.8933e-09	1.9264e-05	1.0139e-07	1	1	0	1	1
Give	yejK_1		Nucleoid-associated protein YejK	6	0	0	72	100	100	inf	3.8933e-09	1.9264e-05	1.0139e-07	1	1	0	1	1
Give	group_4344		hypothetical protein	6	0	0	72	100	100	inf	3.8933e-09	1.9264e-05	1.0139e-07	1	1	0	1	1
Give	group_4348		hypothetical protein	6	0	0	72	100	100	inf	3.8933e-09	1.9264e-05	1.0139e-07	1	1	0	1	1
Give	group_4349		hypothetical protein	6	0	0	72	100	100	inf	3.8933e-09	1.9264e-05	1.0139e-07	1	1	0	1	1
Give	group_4359		hypothetical protein	6	0	0	72	100	100	inf	3.8933e-09	1.9264e-05	1.0139e-07	1	1	0	1	1
Give	group_4360		hypothetical protein	6	0	0	72	100	100	inf	3.8933e-09	1.9264e-05	1.0139e-07	1	1	0	1	1
Give	group_4361		hypothetical protein	6	0	0	72	100	100	inf	3.8933e-09	1.9264e-05	1.0139e-07	1	1	0	1	1
Give	group_4362		putative protein	6	0	0	72	100	100	inf	3.8933e-09	1.9264e-05	1.0139e-07	1	1	0	1	1
Give	group_4363		hypothetical protein	6	0	0	72	100	100	inf	3.8933e-09	1.9264e-05	1.0139e-07	1	1	0	1	1
Give	group_4364		hypothetical protein	6	0	0	72	100	100	inf	3.8933e-09	1.9264e-05	1.0139e-07	1	1	0	1	1
Give	group_4365		hypothetical protein	6	0	0	72	100	100	inf	3.8933e-09	1.9264e-05	1.0139e-07	1	1	0	1	1
Give	group_4366		hypothetical protein	6	0	0	72	100	100	inf	3.8933e-09	1.9264e-05	1.0139e-07	1	1	0	1	1
Give	group_4367		hypothetical protein	6	0	0	72	100	100	inf	3.8933e-09	1.9264e-05	1.0139e-07	1	1	0	1	1
Give	group_4368		hypothetical protein	6	0	0	72	100	100	inf	3.8933e-09	1.9264e-05	1.0139e-07	1	1	0	1	1
Give	group_4369		hypothetical protein	6	0	0	72	100	100	inf	3.8933e-09	1.9264e-05	1.0139e-07	1	1	0	1	1
Give	group_4370		hypothetical protein	6	0	0	72	100	100	inf	3.8933e-09	1.9264e-05	1.0139e-07	1	1	0	1	1
Give	group_4371		hypothetical protein	6	0	0	72	100	100	inf	3.8933e-09	1.9264e-05	1.0139e-07	1	1	0	1	1
Give	group_4372		hypothetical protein	6	0	0	72	100	100	inf	3.8933e-09	1.9264e-05	1.0139e-07	1	1	0	1	1
Give	group_4376		hypothetical protein	6	0	0	72	100	100	inf	3.8933e-09	1.9264e-05	1.0139e-07	1	1	0	1	1
Give	group_4377		hypothetical protein	6	0	0	72	100	100	inf	3.8933e-09	1.9264e-05	1.0139e-07	1	1	0	1	1
Give	group_4378		hypothetical protein	6	0	0	72	100	100	inf	3.8933e-09	1.9264e-05	1.0139e-07	1	1	0	1	1
Give	group_4379		hypothetical protein	6	0	0	72	100	100	inf	3.8933e-09	1.9264e-05	1.0139e-07	1	1	0	1	1
Give	group_4380		hypothetical protein	6	0	0	72	100	100	inf	3.8933e-09	1.9264e-05	1.0139e-07	1	1	0	1	1
Give	hin_1		DNA-invertase hin	6	0	0	72	100	100	inf	3.8933e-09	1.9264e-05	1.0139e-07	1	1	0	1	1
Give	group_4385		hypothetical protein	6	0	0	72	100	100	inf	3.8933e-09	1.9264e-05	1.0139e-07	1	1	0	1	1
Give	group_4386		hypothetical protein	6	0	0	72	100	100	inf	3.8933e-09	1.9264e-05	1.0139e-07	1	1	0	1	1
Give	group_4387		hypothetical protein	6	0	0	72	100	100	inf	3.8933e-09	1.9264e-05	1.0139e-07	1	1	0	1	1
Give	group_4388		hypothetical protein	6	0	0	72	100	100	inf	3.8933e-09	1.9264e-05	1.0139e-07	1	1	0	1	1
Give	group_4389		hypothetical protein	6	0	0	72	100	100	inf	3.8933e-09	1.9264e-05	1.0139e-07	1	1	0	1	1
Give	group_4390		hypothetical protein	6	0	0	72	100	100	inf	3.8933e-09	1.9264e-05	1.0139e-07	1	1	0	1	1
Give	group_4391		hypothetical protein	6	0	0	72	100	100	inf	3.8933e-09	1.9264e-05	1.0139e-07	1	1	0	1	1
Give	group_4392		hypothetical protein	6	0	0	72	100	100	inf	3.8933e-09	1.9264e-05	1.0139e-07	1	1	0	1	1
Give	group_4393		hypothetical protein	6	0	0	72	100	100	inf	3.8933e-09	1.9264e-05	1.0139e-07	1	1	0	1	1
Give	group_4394		hypothetical protein	6	0	0	72	100	100	inf	3.8933e-09	1.9264e-05	1.0139e-07	1	1	0	1	1
Give	group_4395		hypothetical protein	6	0	0	72	100	100	inf	3.8933e-09	1.9264e-05	1.0139e-07	1	1	0	1	1
Give	group_4398	intA_1	Prophage integrase IntA	6	0	0	72	100	100	inf	3.8933e-09	1.9264e-05	1.0139e-07	1	1	0	1	1
Give	group_4399		hypothetical protein	6	0	0	72	100	100	inf	3.8933e-09	1.9264e-05	1.0139e-07	1	1	0	1	1
Give	group_4400		hypothetical protein	6	0	0	72	100	100	inf	3.8933e-09	1.9264e-05	1.0139e-07	1	1	0	1	1
Give	group_4401		hypothetical protein	6	0	0	72	100	100	inf	3.8933e-09	1.9264e-05	1.0139e-07	1	1	0	1	1
Give	group_4402		hypothetical protein	6	0	0	72	100	100	inf	3.8933e-09	1.9264e-05	1.0139e-07	1	1	0	1	1
Give	group_4403		hypothetical protein	6	0	0	72	100	100	inf	3.8933e-09	1.9264e-05	1.0139e-07	1	1	0	1	1
Give	group_4404		hypothetical protein	6	0	0	72	100	100	inf	3.8933e-09	1.9264e-05	1.0139e-07	1	1	0	1	1
Give	group_4405		hypothetical protein	6	0	0	72	100	100	inf	3.8933e-09	1.9264e-05	1.0139e-07	1	1	0	1	1
Give	group_4406		hypothetical protein	6	0	0	72	100	100	inf	3.8933e-09	1.9264e-05	1.0139e-07	1	1	0	1	1
Give	group_4407		hypothetical protein	6	0	0	72	100	100	inf	3.8933e-09	1.9264e-05	1.0139e-07	1	1	0	1	1
Give	group_4408		hypothetical protein	6	0	0	72	100	100	inf	3.8933e-09	1.9264e-05	1.0139e-07	1	1	0	1	1
Give	group_4409		hypothetical protein	6	0	0	72	100	100	inf	3.8933e-09	1.9264e-05	1.0139e-07	1	1	0	1	1
Give	group_4410		hypothetical protein	6	0	0	72	100	100	inf	3.8933e-09	1.9264e-05	1.0139e-07	1	1	0	1	1
Give	group_4411		hypothetical protein	6	0	0	72	100	100	inf	3.8933e-09	1.9264e-05	1.0139e-07	1	1	0	1	1
Give	group_4412		hypothetical protein	6	0	0	72	100	100	inf	3.8933e-09	1.9264e-05	1.0139e-07	1	1	0	1	1
Give	group_4413		hypothetical protein	6	0	0	72	100	100	inf	3.8933e-09	1.9264e-05	1.0139e-07	1	1	0	1	1
Give	group_4414		hypothetical protein	6	0	0	72	100	100	inf	3.8933e-09	1.9264e-05	1.0139e-07	1	1	0	1	1
Give	group_4415		hypothetical protein	6	0	0	72	100	100	inf	3.8933e-09	1.9264e-05	1.0139e-07	1	1	0	1	1
Give	dcm_1		DNA-cytosine methyltransferase	6	0	0	72	100	100	inf	3.8933e-09	1.9264e-05	1.0139e-07	1	1	0	1	1
Give	ecoRIIR		Type-2 restriction enzyme EcoRII	6	0	0	72	100	100	inf	3.8933e-09	1.9264e-05	1.0139e-07	1	1	0	1	1
Give	group_4419		hypothetical protein	6	0	0	72	100	100	inf	3.8933e-09	1.9264e-05	1.0139e-07	1	1	0	1	1
Give	group_4420		hypothetical protein	6	0	0	72	100	100	inf	3.8933e-09	1.9264e-05	1.0139e-07	1	1	0	1	1
Give	group_4422		hypothetical protein	6	0	0	72	100	100	inf	3.8933e-09	1.9264e-05	1.0139e-07	1	1	0	1	1
Give	group_4426		hypothetical protein	6	0	0	72	100	100	inf	3.8933e-09	1.9264e-05	1.0139e-07	1	1	0	1	1
Give	group_4427		hypothetical protein	6	0	0	72	100	100	inf	3.8933e-09	1.9264e-05	1.0139e-07	1	1	0	1	1
Give	group_4428		hypothetical protein	6	0	0	72	100	100	inf	3.8933e-09	1.9264e-05	1.0139e-07	1	1	0	1	1
Give	group_4429		hypothetical protein	6	0	0	72	100	100	inf	3.8933e-09	1.9264e-05	1.0139e-07	1	1	0	1	1
Give	group_4430		hypothetical protein	6	0	0	72	100	100	inf	3.8933e-09	1.9264e-05	1.0139e-07	1	1	0	1	1
Give	group_4431		hypothetical protein	6	0	0	72	100	100	inf	3.8933e-09	1.9264e-05	1.0139e-07	1	1	0	1	1
Give	group_4435		hypothetical protein	6	0	0	72	100	100	inf	3.8933e-09	1.9264e-05	1.0139e-07	1	1	0	1	1
Give	group_4436		hypothetical protein	6	0	0	72	100	100	inf	3.8933e-09	1.9264e-05	1.0139e-07	1	1	0	1	1
Give	group_4437		hypothetical protein	6	0	0	72	100	100	inf	3.8933e-09	1.9264e-05	1.0139e-07	1	1	0	1	1
Give	group_4439		hypothetical protein	6	0	0	72	100	100	inf	3.8933e-09	1.9264e-05	1.0139e-07	1	1	0	1	1
Give	group_4441		hypothetical protein	6	0	0	72	100	100	inf	3.8933e-09	1.9264e-05	1.0139e-07	1	1	0	1	1
Give	group_4442		hypothetical protein	6	0	0	72	100	100	inf	3.8933e-09	1.9264e-05	1.0139e-07	1	1	0	1	1
Give	group_4445		hypothetical protein	6	0	0	72	100	100	inf	3.8933e-09	1.9264e-05	1.0139e-07	1	1	0	1	1
Give	group_4446		hypothetical protein	6	0	0	72	100	100	inf	3.8933e-09	1.9264e-05	1.0139e-07	1	1	0	1	1
Give	group_4447		hypothetical protein	6	0	0	72	100	100	inf	3.8933e-09	1.9264e-05	1.0139e-07	1	1	0	1	1
Give	group_4448		hypothetical protein	6	0	0	72	100	100	inf	3.8933e-09	1.9264e-05	1.0139e-07	1	1	0	1	1
Give	group_4449		hypothetical protein	6	0	0	72	100	100	inf	3.8933e-09	1.9264e-05	1.0139e-07	1	1	0	1	1
Give	group_4450		hypothetical protein	6	0	0	72	100	100	inf	3.8933e-09	1.9264e-05	1.0139e-07	1	1	0	1	1
Give	group_4451		hypothetical protein	6	0	0	72	100	100	inf	3.8933e-09	1.9264e-05	1.0139e-07	1	1	0	1	1
Give	clpP_1		ATP-dependent Clp protease proteolytic subunit	6	0	0	72	100	100	inf	3.8933e-09	1.9264e-05	1.0139e-07	1	1	0	1	1
Give	group_4453		hypothetical protein	6	0	0	72	100	100	inf	3.8933e-09	1.9264e-05	1.0139e-07	1	1	0	1	1
Give	group_4454		hypothetical protein	6	0	0	72	100	100	inf	3.8933e-09	1.9264e-05	1.0139e-07	1	1	0	1	1
Give	group_4455		hypothetical protein	6	0	0	72	100	100	inf	3.8933e-09	1.9264e-05	1.0139e-07	1	1	0	1	1
Give	group_4456		hypothetical protein	6	0	0	72	100	100	inf	3.8933e-09	1.9264e-05	1.0139e-07	1	1	0	1	1
Give	group_4457		hypothetical protein	6	0	0	72	100	100	inf	3.8933e-09	1.9264e-05	1.0139e-07	1	1	0	1	1
Give	group_4458		hypothetical protein	6	0	0	72	100	100	inf	3.8933e-09	1.9264e-05	1.0139e-07	1	1	0	1	1
Give	group_4459		hypothetical protein	6	0	0	72	100	100	inf	3.8933e-09	1.9264e-05	1.0139e-07	1	1	0	1	1
Give	group_4460		hypothetical protein	6	0	0	72	100	100	inf	3.8933e-09	1.9264e-05	1.0139e-07	1	1	0	1	1
Give	group_4461		hypothetical protein	6	0	0	72	100	100	inf	3.8933e-09	1.9264e-05	1.0139e-07	1	1	0	1	1
Give	group_4462		hypothetical protein	6	0	0	72	100	100	inf	3.8933e-09	1.9264e-05	1.0139e-07	1	1	0	1	1
Give	group_4463		hypothetical protein	6	0	0	72	100	100	inf	3.8933e-09	1.9264e-05	1.0139e-07	1	1	0	1	1
Give	group_4464		hypothetical protein	6	0	0	72	100	100	inf	3.8933e-09	1.9264e-05	1.0139e-07	1	1	0	1	1
Give	group_4465		hypothetical protein	6	0	0	72	100	100	inf	3.8933e-09	1.9264e-05	1.0139e-07	1	1	0	1	1
Give	group_4466		hypothetical protein	6	0	0	72	100	100	inf	3.8933e-09	1.9264e-05	1.0139e-07	1	1	0	1	1
Give	group_4467		hypothetical protein	6	0	0	72	100	100	inf	3.8933e-09	1.9264e-05	1.0139e-07	1	1	0	1	1
Give	group_4468		hypothetical protein	6	0	0	72	100	100	inf	3.8933e-09	1.9264e-05	1.0139e-07	1	1	0	1	1
Give	group_4469		hypothetical protein	6	0	0	72	100	100	inf	3.8933e-09	1.9264e-05	1.0139e-07	1	1	0	1	1
Give	group_4470	umuD_1	Protein UmuD	6	0	0	72	100	100	inf	3.8933e-09	1.9264e-05	1.0139e-07	1	1	0	1	1
Give	group_4471		hypothetical protein	6	0	0	72	100	100	inf	3.8933e-09	1.9264e-05	1.0139e-07	1	1	0	1	1
Give	group_4472		hypothetical protein	6	0	0	72	100	100	inf	3.8933e-09	1.9264e-05	1.0139e-07	1	1	0	1	1
Give	group_4473		hypothetical protein	6	0	0	72	100	100	inf	3.8933e-09	1.9264e-05	1.0139e-07	1	1	0	1	1
Give	group_4474		hypothetical protein	6	0	0	72	100	100	inf	3.8933e-09	1.9264e-05	1.0139e-07	1	1	0	1	1
Give	group_4476		hypothetical protein	6	0	0	72	100	100	inf	3.8933e-09	1.9264e-05	1.0139e-07	1	1	0	1	1
Give	group_4477		hypothetical protein	6	0	0	72	100	100	inf	3.8933e-09	1.9264e-05	1.0139e-07	1	1	0	1	1
Give	sdiA_1		Regulatory protein SdiA	6	0	0	72	100	100	inf	3.8933e-09	1.9264e-05	1.0139e-07	1	1	0	1	1
Give	group_4479		hypothetical protein	6	0	0	72	100	100	inf	3.8933e-09	1.9264e-05	1.0139e-07	1	1	0	1	1
Give	group_4480		hypothetical protein	6	0	0	72	100	100	inf	3.8933e-09	1.9264e-05	1.0139e-07	1	1	0	1	1
Give	group_4481	intA_2	Prophage integrase IntA	6	0	0	72	100	100	inf	3.8933e-09	1.9264e-05	1.0139e-07	1	1	0	1	1
Give	cysL_1		HTH-type transcriptional regulator CysL	6	0	0	72	100	100	inf	3.8933e-09	1.9264e-05	1.0139e-07	1	1	0	1	1
Give	gapA_2		Glyceraldehyde-3-phosphate dehydrogenase A	6	0	0	72	100	100	inf	3.8933e-09	1.9264e-05	1.0139e-07	1	1	0	1	1
Give	group_4484		hypothetical protein	6	0	0	72	100	100	inf	3.8933e-09	1.9264e-05	1.0139e-07	1	1	0	1	1
Give	menE_1		2-succinylbenzoate--CoA ligase	6	0	0	72	100	100	inf	3.8933e-09	1.9264e-05	1.0139e-07	1	1	0	1	1
Give	speA_2		Arginine decarboxylase	6	0	0	72	100	100	inf	3.8933e-09	1.9264e-05	1.0139e-07	1	1	0	1	1
Give	group_4487		hypothetical protein	6	0	0	72	100	100	inf	3.8933e-09	1.9264e-05	1.0139e-07	1	1	0	1	1
Give	group_4489		hypothetical protein	6	0	0	72	100	100	inf	3.8933e-09	1.9264e-05	1.0139e-07	1	1	0	1	1
Give	group_4490		hypothetical protein	6	0	0	72	100	100	inf	3.8933e-09	1.9264e-05	1.0139e-07	1	1	0	1	1
Give	group_4491		hypothetical protein	6	0	0	72	100	100	inf	3.8933e-09	1.9264e-05	1.0139e-07	1	1	0	1	1
Give	group_4492		hypothetical protein	6	0	0	72	100	100	inf	3.8933e-09	1.9264e-05	1.0139e-07	1	1	0	1	1
Give	group_4493		hypothetical protein	6	0	0	72	100	100	inf	3.8933e-09	1.9264e-05	1.0139e-07	1	1	0	1	1
Give	group_4494		hypothetical protein	6	0	0	72	100	100	inf	3.8933e-09	1.9264e-05	1.0139e-07	1	1	0	1	1
Give	group_4495		hypothetical protein	6	0	0	72	100	100	inf	3.8933e-09	1.9264e-05	1.0139e-07	1	1	0	1	1
Give	group_4496		hypothetical protein	6	0	0	72	100	100	inf	3.8933e-09	1.9264e-05	1.0139e-07	1	1	0	1	1
Give	group_4497		hypothetical protein	6	0	0	72	100	100	inf	3.8933e-09	1.9264e-05	1.0139e-07	1	1	0	1	1
Give	group_4498		hypothetical protein	6	0	0	72	100	100	inf	3.8933e-09	1.9264e-05	1.0139e-07	1	1	0	1	1
Give	group_4499	intA_3	Prophage integrase IntA	6	0	0	72	100	100	inf	3.8933e-09	1.9264e-05	1.0139e-07	1	1	0	1	1
Give	group_4500	lst	CMP-N-acetylneuraminate:beta-galactoside alpha-2,3-sialyltransferase	6	0	0	72	100	100	inf	3.8933e-09	1.9264e-05	1.0139e-07	1	1	0	1	1
Give	group_4502		hypothetical protein	6	0	0	72	100	100	inf	3.8933e-09	1.9264e-05	1.0139e-07	1	1	0	1	1
Give	group_4503		hypothetical protein	6	0	0	72	100	100	inf	3.8933e-09	1.9264e-05	1.0139e-07	1	1	0	1	1
Give	group_4504	fryB	PTS system fructose-like EIIB component 1	6	0	0	72	100	100	inf	3.8933e-09	1.9264e-05	1.0139e-07	1	1	0	1	1
Give	fryC		Fructose-like permease IIC component 1	6	0	0	72	100	100	inf	3.8933e-09	1.9264e-05	1.0139e-07	1	1	0	1	1
Give	ypdF		Aminopeptidase YpdF	6	0	0	72	100	100	inf	3.8933e-09	1.9264e-05	1.0139e-07	1	1	0	1	1
Give	ypdE		Aminopeptidase YpdE	6	0	0	72	100	100	inf	3.8933e-09	1.9264e-05	1.0139e-07	1	1	0	1	1
Give	group_4508	fryA	Multiphosphoryl transfer protein 1	6	0	0	72	100	100	inf	3.8933e-09	1.9264e-05	1.0139e-07	1	1	0	1	1
Give	group_4509	rhaR_7	HTH-type transcriptional activator RhaR	6	0	0	72	100	100	inf	3.8933e-09	1.9264e-05	1.0139e-07	1	1	0	1	1
Give	group_4510		hypothetical protein	6	0	0	72	100	100	inf	3.8933e-09	1.9264e-05	1.0139e-07	1	1	0	1	1
Give	group_4511		hypothetical protein	6	0	0	72	100	100	inf	3.8933e-09	1.9264e-05	1.0139e-07	1	1	0	1	1
Give	group_4512		hypothetical protein	6	0	0	72	100	100	inf	3.8933e-09	1.9264e-05	1.0139e-07	1	1	0	1	1
Give	group_4513		hypothetical protein	6	0	0	72	100	100	inf	3.8933e-09	1.9264e-05	1.0139e-07	1	1	0	1	1
Give	group_4514		hypothetical protein	6	0	0	72	100	100	inf	3.8933e-09	1.9264e-05	1.0139e-07	1	1	0	1	1
Give	group_4515		hypothetical protein	6	0	0	72	100	100	inf	3.8933e-09	1.9264e-05	1.0139e-07	1	1	0	1	1
Give	group_4516		hypothetical protein	6	0	0	72	100	100	inf	3.8933e-09	1.9264e-05	1.0139e-07	1	1	0	1	1
Give	group_4517		hypothetical protein	6	0	0	72	100	100	inf	3.8933e-09	1.9264e-05	1.0139e-07	1	1	0	1	1
Give	group_4518		hypothetical protein	6	0	0	72	100	100	inf	3.8933e-09	1.9264e-05	1.0139e-07	1	1	0	1	1
Give	group_4519	xerC_2	Tyrosine recombinase XerC	6	0	0	72	100	100	inf	3.8933e-09	1.9264e-05	1.0139e-07	1	1	0	1	1
Give	group_4520		hypothetical protein	6	0	0	72	100	100	inf	3.8933e-09	1.9264e-05	1.0139e-07	1	1	0	1	1
Give	group_4521		hypothetical protein	6	0	0	72	100	100	inf	3.8933e-09	1.9264e-05	1.0139e-07	1	1	0	1	1
Give	group_4522		hypothetical protein	6	0	0	72	100	100	inf	3.8933e-09	1.9264e-05	1.0139e-07	1	1	0	1	1
Give	group_4523		hypothetical protein	6	0	0	72	100	100	inf	3.8933e-09	1.9264e-05	1.0139e-07	1	1	0	1	1
Give	group_4524		hypothetical protein	6	0	0	72	100	100	inf	3.8933e-09	1.9264e-05	1.0139e-07	1	1	0	1	1
Give	group_4525		hypothetical protein	6	0	0	72	100	100	inf	3.8933e-09	1.9264e-05	1.0139e-07	1	1	0	1	1
Give	group_4526	dam_2	DNA adenine methylase	6	0	0	72	100	100	inf	3.8933e-09	1.9264e-05	1.0139e-07	1	1	0	1	1
Give	group_4527		hypothetical protein	6	0	0	72	100	100	inf	3.8933e-09	1.9264e-05	1.0139e-07	1	1	0	1	1
Give	group_4528		hypothetical protein	6	0	0	72	100	100	inf	3.8933e-09	1.9264e-05	1.0139e-07	1	1	0	1	1
Give	group_4529		hypothetical protein	6	0	0	72	100	100	inf	3.8933e-09	1.9264e-05	1.0139e-07	1	1	0	1	1
Give	group_4530		hypothetical protein	6	0	0	72	100	100	inf	3.8933e-09	1.9264e-05	1.0139e-07	1	1	0	1	1
Give	group_4531		hypothetical protein	6	0	0	72	100	100	inf	3.8933e-09	1.9264e-05	1.0139e-07	1	1	0	1	1
Give	group_4532		hypothetical protein	6	0	0	72	100	100	inf	3.8933e-09	1.9264e-05	1.0139e-07	1	1	0	1	1
Give	group_4533		hypothetical protein	6	0	0	72	100	100	inf	3.8933e-09	1.9264e-05	1.0139e-07	1	1	0	1	1
Give	group_4534		hypothetical protein	6	0	0	72	100	100	inf	3.8933e-09	1.9264e-05	1.0139e-07	1	1	0	1	1
Give	group_4535		hypothetical protein	6	0	0	72	100	100	inf	3.8933e-09	1.9264e-05	1.0139e-07	1	1	0	1	1
Give	group_4536		hypothetical protein	6	0	0	72	100	100	inf	3.8933e-09	1.9264e-05	1.0139e-07	1	1	0	1	1
Give	group_4537		hypothetical protein	6	0	0	72	100	100	inf	3.8933e-09	1.9264e-05	1.0139e-07	1	1	0	1	1
Give	group_4538		hypothetical protein	6	0	0	72	100	100	inf	3.8933e-09	1.9264e-05	1.0139e-07	1	1	0	1	1
Give	group_4539		hypothetical protein	6	0	0	72	100	100	inf	3.8933e-09	1.9264e-05	1.0139e-07	1	1	0	1	1
Give	group_4540		hypothetical protein	6	0	0	72	100	100	inf	3.8933e-09	1.9264e-05	1.0139e-07	1	1	0	1	1
Give	group_4541		hypothetical protein	6	0	0	72	100	100	inf	3.8933e-09	1.9264e-05	1.0139e-07	1	1	0	1	1
Give	group_4542		hypothetical protein	6	0	0	72	100	100	inf	3.8933e-09	1.9264e-05	1.0139e-07	1	1	0	1	1
Give	group_4543		hypothetical protein	6	0	0	72	100	100	inf	3.8933e-09	1.9264e-05	1.0139e-07	1	1	0	1	1
Give	group_4544		hypothetical protein	6	0	0	72	100	100	inf	3.8933e-09	1.9264e-05	1.0139e-07	1	1	0	1	1
Give	group_4545		hypothetical protein	6	0	0	72	100	100	inf	3.8933e-09	1.9264e-05	1.0139e-07	1	1	0	1	1
Give	group_4546		hypothetical protein	6	0	0	72	100	100	inf	3.8933e-09	1.9264e-05	1.0139e-07	1	1	0	1	1
Give	group_4547		hypothetical protein	6	0	0	72	100	100	inf	3.8933e-09	1.9264e-05	1.0139e-07	1	1	0	1	1
Give	group_4548		hypothetical protein	6	0	0	72	100	100	inf	3.8933e-09	1.9264e-05	1.0139e-07	1	1	0	1	1
Give	group_4549		hypothetical protein	6	0	0	72	100	100	inf	3.8933e-09	1.9264e-05	1.0139e-07	1	1	0	1	1
Give	group_4550		hypothetical protein	6	0	0	72	100	100	inf	3.8933e-09	1.9264e-05	1.0139e-07	1	1	0	1	1
Give	group_4551		hypothetical protein	6	0	0	72	100	100	inf	3.8933e-09	1.9264e-05	1.0139e-07	1	1	0	1	1
Give	group_4552		hypothetical protein	6	0	0	72	100	100	inf	3.8933e-09	1.9264e-05	1.0139e-07	1	1	0	1	1
Give	group_4555		hypothetical protein	6	0	0	72	100	100	inf	3.8933e-09	1.9264e-05	1.0139e-07	1	1	0	1	1
Give	group_4556		hypothetical protein	6	0	0	72	100	100	inf	3.8933e-09	1.9264e-05	1.0139e-07	1	1	0	1	1
Give	group_4557		hypothetical protein	6	0	0	72	100	100	inf	3.8933e-09	1.9264e-05	1.0139e-07	1	1	0	1	1
Give	group_4558		hypothetical protein	6	0	0	72	100	100	inf	3.8933e-09	1.9264e-05	1.0139e-07	1	1	0	1	1
Give	mbeC		Mobilization protein MbeC	6	0	0	72	100	100	inf	3.8933e-09	1.9264e-05	1.0139e-07	1	1	0	1	1
Give	group_4640		hypothetical protein	6	0	0	72	100	100	inf	3.8933e-09	1.9264e-05	1.0139e-07	1	1	0	1	1
Give	group_5638		hypothetical protein	6	0	0	72	100	100	inf	3.8933e-09	1.9264e-05	1.0139e-07	1	1	0	1	1
Give	group_594		hypothetical protein	6	0	0	72	100	100	inf	3.8933e-09	1.9264e-05	1.0139e-07	1	1	0	1	1
Give	group_93		hypothetical protein	6	0	0	72	100	100	inf	3.8933e-09	1.9264e-05	1.0139e-07	1	1	0	1	1
Give	group_979		hypothetical protein	6	0	0	72	100	100	inf	3.8933e-09	1.9264e-05	1.0139e-07	1	1	0	1	1
Give	group_1210		hypothetical protein	6	1	0	71	100	98.6111	inf	2.72531e-08	0.000134848	6.57797e-07	1	1	0	1	1
Give	group_1689		hypothetical protein	6	1	0	71	100	98.6111	inf	2.72531e-08	0.000134848	6.57797e-07	1	1	0	1	1
Give	group_1786		hypothetical protein	6	1	0	71	100	98.6111	inf	2.72531e-08	0.000134848	6.57797e-07	1	1	0	1	1
Give	group_2153	sifA_1	Secreted effector protein SifA	6	1	0	71	100	98.6111	inf	2.72531e-08	0.000134848	6.57797e-07	1	1	0	1	1
Give	group_2389		hypothetical protein	6	1	0	71	100	98.6111	inf	2.72531e-08	0.000134848	6.57797e-07	1	1	0	1	1
Give	group_4416		hypothetical protein	6	1	0	71	100	98.6111	inf	2.72531e-08	0.000134848	6.57797e-07	1	1	0	1	1
Give	group_4421	pipB2	Secreted effector protein PipB2	6	1	0	71	100	98.6111	inf	2.72531e-08	0.000134848	6.57797e-07	1	1	0	1	1
Give	adhB_1		Alcohol dehydrogenase 2	6	1	0	71	100	98.6111	inf	2.72531e-08	0.000134848	6.57797e-07	1	1	0	1	1
Give	group_4553		hypothetical protein	6	1	0	71	100	98.6111	inf	2.72531e-08	0.000134848	6.57797e-07	1	1	0	1	1
Give	group_4554		hypothetical protein	6	1	0	71	100	98.6111	inf	2.72531e-08	0.000134848	6.57797e-07	1	1	0	1	1
Give	group_1951		hypothetical protein	6	2	0	70	100	97.2222	inf	1.09012e-07	0.000539393	2.52053e-06	1	1	0	1	1
Give	group_3469		hypothetical protein	6	2	0	70	100	97.2222	inf	1.09012e-07	0.000539393	2.52053e-06	1	1	0	1	1
Give	group_3470		hypothetical protein	6	2	0	70	100	97.2222	inf	1.09012e-07	0.000539393	2.52053e-06	1	1	0	1	1
Give	group_3471		hypothetical protein	6	2	0	70	100	97.2222	inf	1.09012e-07	0.000539393	2.52053e-06	1	1	0	1	1
Give	group_3472		hypothetical protein	6	2	0	70	100	97.2222	inf	1.09012e-07	0.000539393	2.52053e-06	1	1	0	1	1
Give	group_3473	rfbC	dTDP-4-dehydrorhamnose 3,5-epimerase	6	2	0	70	100	97.2222	inf	1.09012e-07	0.000539393	2.52053e-06	1	1	0	1	1
Give	group_4374		hypothetical protein	6	2	0	70	100	97.2222	inf	1.09012e-07	0.000539393	2.52053e-06	1	1	0	1	1
Give	group_4375		hypothetical protein	6	2	0	70	100	97.2222	inf	1.09012e-07	0.000539393	2.52053e-06	1	1	0	1	1
Give	group_615		hypothetical protein	6	2	0	70	100	97.2222	inf	1.09012e-07	0.000539393	2.52053e-06	1	1	0	1	1
Give	sopD_2		Secreted effector protein SopD	6	3	0	69	100	95.8333	inf	3.27037e-07	0.00161818	7.49157e-06	1	1	0	1	1
Give	group_2083		hypothetical protein	6	4	0	68	100	94.4444	inf	8.17593e-07	0.00404545	1.73624e-05	1	1	0	1	1
Give	group_2084		hypothetical protein	6	4	0	68	100	94.4444	inf	8.17593e-07	0.00404545	1.73624e-05	1	1	0	1	1
Give	group_2085		hypothetical protein	6	4	0	68	100	94.4444	inf	8.17593e-07	0.00404545	1.73624e-05	1	1	0	1	1
Give	group_2086		hypothetical protein	6	4	0	68	100	94.4444	inf	8.17593e-07	0.00404545	1.73624e-05	1	1	0	1	1
Give	group_2093	rop	Regulatory protein rop	6	4	0	68	100	94.4444	inf	8.17593e-07	0.00404545	1.73624e-05	1	1	0	1	1
Give	group_4063		hypothetical protein	6	4	0	68	100	94.4444	inf	8.17593e-07	0.00404545	1.73624e-05	1	1	0	1	1
Give	group_4423		hypothetical protein	6	4	0	68	100	94.4444	inf	8.17593e-07	0.00404545	1.73624e-05	1	1	0	1	1
Give	group_4424	intQ	Putative defective protein IntQ	6	4	0	68	100	94.4444	inf	8.17593e-07	0.00404545	1.73624e-05	1	1	0	1	1
Give	group_4425		hypothetical protein	6	4	0	68	100	94.4444	inf	8.17593e-07	0.00404545	1.73624e-05	1	1	0	1	1
Give	group_4432		hypothetical protein	6	4	0	68	100	94.4444	inf	8.17593e-07	0.00404545	1.73624e-05	1	1	0	1	1
Give	group_4433		hypothetical protein	6	4	0	68	100	94.4444	inf	8.17593e-07	0.00404545	1.73624e-05	1	1	0	1	1
Give	group_4434		hypothetical protein	6	4	0	68	100	94.4444	inf	8.17593e-07	0.00404545	1.73624e-05	1	1	0	1	1
Give	rusA		Crossover junction endodeoxyribonuclease RusA	6	4	0	68	100	94.4444	inf	8.17593e-07	0.00404545	1.73624e-05	1	1	0	1	1
Give	group_4443		hypothetical protein	6	4	0	68	100	94.4444	inf	8.17593e-07	0.00404545	1.73624e-05	1	1	0	1	1
Give	group_4444		hypothetical protein	6	4	0	68	100	94.4444	inf	8.17593e-07	0.00404545	1.73624e-05	1	1	0	1	1
Give	group_640		hypothetical protein	6	4	0	68	100	94.4444	inf	8.17593e-07	0.00404545	1.73624e-05	1	1	0	1	1
Give	group_948	fliY_2	L-cystine-binding protein FliY	6	4	0	68	100	94.4444	inf	8.17593e-07	0.00404545	1.73624e-05	1	1	0	1	1
Give	group_2087		hypothetical protein	5	1	1	71	83.3333	98.6111	355	1.6858e-06	0.00834133	3.35849e-05	1	1	1	1	1
Give	group_1632		hypothetical protein	6	5	0	67	100	93.0556	inf	1.7987e-06	0.00889999	3.35849e-05	1	1	0	1	1
Give	group_1690		hypothetical protein	6	5	0	67	100	93.0556	inf	1.7987e-06	0.00889999	3.35849e-05	1	1	0	1	1
Give	group_2077	xerC_1	Tyrosine recombinase XerC	6	5	0	67	100	93.0556	inf	1.7987e-06	0.00889999	3.35849e-05	1	1	0	1	1
Give	group_2078		hypothetical protein	6	5	0	67	100	93.0556	inf	1.7987e-06	0.00889999	3.35849e-05	1	1	0	1	1
Give	group_2079		hypothetical protein	6	5	0	67	100	93.0556	inf	1.7987e-06	0.00889999	3.35849e-05	1	1	0	1	1
Give	group_2080		hypothetical protein	6	5	0	67	100	93.0556	inf	1.7987e-06	0.00889999	3.35849e-05	1	1	0	1	1
Give	group_2081		hypothetical protein	6	5	0	67	100	93.0556	inf	1.7987e-06	0.00889999	3.35849e-05	1	1	0	1	1
Give	group_2323		hypothetical protein	6	5	0	67	100	93.0556	inf	1.7987e-06	0.00889999	3.35849e-05	1	1	0	1	1
Give	group_2567		hypothetical protein	6	5	0	67	100	93.0556	inf	1.7987e-06	0.00889999	3.35849e-05	1	1	0	1	1
Give	group_2592		hypothetical protein	6	5	0	67	100	93.0556	inf	1.7987e-06	0.00889999	3.35849e-05	1	1	0	1	1
Give	group_4276		hypothetical protein	6	5	0	67	100	93.0556	inf	1.7987e-06	0.00889999	3.35849e-05	1	1	0	1	1
Give	group_4345		hypothetical protein	6	5	0	67	100	93.0556	inf	1.7987e-06	0.00889999	3.35849e-05	1	1	0	1	1
Give	group_4346		hypothetical protein	6	5	0	67	100	93.0556	inf	1.7987e-06	0.00889999	3.35849e-05	1	1	0	1	1
Give	group_4347		hypothetical protein	6	5	0	67	100	93.0556	inf	1.7987e-06	0.00889999	3.35849e-05	1	1	0	1	1
Give	group_4350		hypothetical protein	6	5	0	67	100	93.0556	inf	1.7987e-06	0.00889999	3.35849e-05	1	1	0	1	1
Give	dnaB_1		Replicative DNA helicase	6	5	0	67	100	93.0556	inf	1.7987e-06	0.00889999	3.35849e-05	1	1	0	1	1
Give	group_4352		hypothetical protein	6	5	0	67	100	93.0556	inf	1.7987e-06	0.00889999	3.35849e-05	1	1	0	1	1
Give	group_4353		hypothetical protein	6	5	0	67	100	93.0556	inf	1.7987e-06	0.00889999	3.35849e-05	1	1	0	1	1
Give	group_4354		hypothetical protein	6	5	0	67	100	93.0556	inf	1.7987e-06	0.00889999	3.35849e-05	1	1	0	1	1
Give	group_4355		hypothetical protein	6	5	0	67	100	93.0556	inf	1.7987e-06	0.00889999	3.35849e-05	1	1	0	1	1
Give	group_4356		hypothetical protein	6	5	0	67	100	93.0556	inf	1.7987e-06	0.00889999	3.35849e-05	1	1	0	1	1
Give	group_4357	ybcO	Putative nuclease YbcO	6	5	0	67	100	93.0556	inf	1.7987e-06	0.00889999	3.35849e-05	1	1	0	1	1
Give	group_4358		hypothetical protein	6	5	0	67	100	93.0556	inf	1.7987e-06	0.00889999	3.35849e-05	1	1	0	1	1
Give	group_4382		hypothetical protein	6	5	0	67	100	93.0556	inf	1.7987e-06	0.00889999	3.35849e-05	1	1	0	1	1
Give	group_4383		hypothetical protein	6	5	0	67	100	93.0556	inf	1.7987e-06	0.00889999	3.35849e-05	1	1	0	1	1
Give	group_4440		hypothetical protein	6	5	0	67	100	93.0556	inf	1.7987e-06	0.00889999	3.35849e-05	1	1	0	1	1
Give	group_56		hypothetical protein	6	5	0	67	100	93.0556	inf	1.7987e-06	0.00889999	3.35849e-05	1	1	0	1	1
Give	group_954		hypothetical protein	6	5	0	67	100	93.0556	inf	1.7987e-06	0.00889999	3.35849e-05	1	1	0	1	1
Give	group_1081		hypothetical protein	6	7	0	65	100	90.2778	inf	6.6809e-06	0.0330571	0.000120646	1	1	0	1	1
Give	ccdB		Toxin CcdB	6	7	0	65	100	90.2778	inf	6.6809e-06	0.0330571	0.000120646	1	1	0	1	1
Give	group_2318		hypothetical protein	6	7	0	65	100	90.2778	inf	6.6809e-06	0.0330571	0.000120646	1	1	0	1	1
Give	group_4373		hypothetical protein	6	7	0	65	100	90.2778	inf	6.6809e-06	0.0330571	0.000120646	1	1	0	1	1
Give	group_610		hypothetical protein	6	7	0	65	100	90.2778	inf	6.6809e-06	0.0330571	0.000120646	1	1	0	1	1
Give	group_703		hypothetical protein	6	7	0	65	100	90.2778	inf	6.6809e-06	0.0330571	0.000120646	1	1	0	1	1
Give	group_4384		hypothetical protein	4	0	2	72	66.6667	100	inf	1.05158e-05	0.0520322	0.000188522	1	1	0	1	1
Give	group_4566		hypothetical protein	4	0	2	72	66.6667	100	inf	1.05158e-05	0.0520322	0.000188522	1	1	0	1	1
Give	group_2068		hypothetical protein	6	8	0	64	100	88.8889	inf	1.16916e-05	0.0578499	0.000193478	1	1	0	1	1
Give	group_260		hypothetical protein	6	8	0	64	100	88.8889	inf	1.16916e-05	0.0578499	0.000193478	1	1	0	1	1
Give	glmM_1		Phosphoglucosamine mutase	6	8	0	64	100	88.8889	inf	1.16916e-05	0.0578499	0.000193478	1	1	0	1	1
Give	rfbM		Mannose-1-phosphate guanylyltransferase RfbM	6	8	0	64	100	88.8889	inf	1.16916e-05	0.0578499	0.000193478	1	1	0	1	1
Give	hexR_1		HTH-type transcriptional regulator HexR	6	8	0	64	100	88.8889	inf	1.16916e-05	0.0578499	0.000193478	1	1	0	1	1
Give	xylE_1		D-xylose-proton symporter	6	8	0	64	100	88.8889	inf	1.16916e-05	0.0578499	0.000193478	1	1	0	1	1
Give	xylE_2		D-xylose-proton symporter	6	8	0	64	100	88.8889	inf	1.16916e-05	0.0578499	0.000193478	1	1	0	1	1
Give	iolB		5-deoxy-glucuronate isomerase	6	8	0	64	100	88.8889	inf	1.16916e-05	0.0578499	0.000193478	1	1	0	1	1
Give	bauC		Putative 3-oxopropanoate dehydrogenase	6	8	0	64	100	88.8889	inf	1.16916e-05	0.0578499	0.000193478	1	1	0	1	1
Give	rhaR_4		HTH-type transcriptional activator RhaR	6	8	0	64	100	88.8889	inf	1.16916e-05	0.0578499	0.000193478	1	1	0	1	1
Give	iolE		Inosose dehydratase	6	8	0	64	100	88.8889	inf	1.16916e-05	0.0578499	0.000193478	1	1	0	1	1
Give	iolG_1		Inositol 2-dehydrogenase	6	8	0	64	100	88.8889	inf	1.16916e-05	0.0578499	0.000193478	1	1	0	1	1
Give	group_4226		hypothetical protein	6	8	0	64	100	88.8889	inf	1.16916e-05	0.0578499	0.000193478	1	1	0	1	1
Give	iolI		Inosose isomerase	6	8	0	64	100	88.8889	inf	1.16916e-05	0.0578499	0.000193478	1	1	0	1	1
Give	yfcJ_1		putative MFS-type transporter YfcJ	6	8	0	64	100	88.8889	inf	1.16916e-05	0.0578499	0.000193478	1	1	0	1	1
Give	iolC_1		5-dehydro-2-deoxygluconokinase	6	8	0	64	100	88.8889	inf	1.16916e-05	0.0578499	0.000193478	1	1	0	1	1
Give	iolD		3D-(3,5/4)-trihydroxycyclohexane-1,2-dione hydrolase	6	8	0	64	100	88.8889	inf	1.16916e-05	0.0578499	0.000193478	1	1	0	1	1
Give	iolG_2		Myo-inositol 2-dehydrogenase	6	8	0	64	100	88.8889	inf	1.16916e-05	0.0578499	0.000193478	1	1	0	1	1
Give	csbX		Alpha-ketoglutarate permease	6	8	0	64	100	88.8889	inf	1.16916e-05	0.0578499	0.000193478	1	1	0	1	1
Give	group_4233		hypothetical protein	6	8	0	64	100	88.8889	inf	1.16916e-05	0.0578499	0.000193478	1	1	0	1	1
Give	group_4234		hypothetical protein	6	8	0	64	100	88.8889	inf	1.16916e-05	0.0578499	0.000193478	1	1	0	1	1
Give	group_472	ygcB	CRISPR-associated endonuclease/helicase Cas3	6	8	0	64	100	88.8889	inf	1.16916e-05	0.0578499	0.000193478	1	1	0	1	1
Give	group_611		hypothetical protein	6	8	0	64	100	88.8889	inf	1.16916e-05	0.0578499	0.000193478	1	1	0	1	1
Give	group_1000	caf1M	Chaperone protein caf1M	6	9	0	63	100	87.5	inf	1.9486e-05	0.0964165	0.00031612	1	1	0	1	1
Give	group_2263	bamA	Outer membrane protein assembly factor BamA	6	9	0	63	100	87.5	inf	1.9486e-05	0.0964165	0.00031612	1	1	0	1	1
Give	group_600		hypothetical protein	6	9	0	63	100	87.5	inf	1.9486e-05	0.0964165	0.00031612	1	1	0	1	1
Give	group_612		hypothetical protein	6	9	0	63	100	87.5	inf	1.9486e-05	0.0964165	0.00031612	1	1	0	1	1
Give	group_781		hypothetical protein	6	9	0	63	100	87.5	inf	1.9486e-05	0.0964165	0.00031612	1	1	0	1	1
Give	group_1691		hypothetical protein	6	10	0	62	100	86.1111	inf	3.11775e-05	0.154266	0.000488185	1	1	0	1	1
Give	group_1816		hypothetical protein	6	10	0	62	100	86.1111	inf	3.11775e-05	0.154266	0.000488185	1	1	0	1	1
Give	group_2063		hypothetical protein	6	10	0	62	100	86.1111	inf	3.11775e-05	0.154266	0.000488185	1	1	0	1	1
Give	group_308		hypothetical protein	6	10	0	62	100	86.1111	inf	3.11775e-05	0.154266	0.000488185	1	1	0	1	1
Give	group_313	ipdC	Indole-3-pyruvate decarboxylase	6	10	0	62	100	86.1111	inf	3.11775e-05	0.154266	0.000488185	1	1	0	1	1
Give	group_4190		hypothetical protein	6	10	0	62	100	86.1111	inf	3.11775e-05	0.154266	0.000488185	1	1	0	1	1
Give	group_4396		hypothetical protein	6	10	0	62	100	86.1111	inf	3.11775e-05	0.154266	0.000488185	1	1	0	1	1
Give	group_4397		hypothetical protein	6	10	0	62	100	86.1111	inf	3.11775e-05	0.154266	0.000488185	1	1	0	1	1
Give	group_4488		hypothetical protein	6	10	0	62	100	86.1111	inf	3.11775e-05	0.154266	0.000488185	1	1	0	1	1
Give	group_337		hypothetical protein	5	4	1	68	83.3333	94.4444	85	3.41754e-05	0.1691	0.000533438	1	1	1	1	1
Give	group_1206		hypothetical protein	6	11	0	61	100	84.7222	inf	4.81835e-05	0.238412	0.000724656	1	1	0	1	1
Give	group_2082		hypothetical protein	6	11	0	61	100	84.7222	inf	4.81835e-05	0.238412	0.000724656	1	1	0	1	1
Give	group_2090		hypothetical protein	6	11	0	61	100	84.7222	inf	4.81835e-05	0.238412	0.000724656	1	1	0	1	1
Give	group_2442		hypothetical protein	6	11	0	61	100	84.7222	inf	4.81835e-05	0.238412	0.000724656	1	1	0	1	1
Give	group_2930	gatY	D-tagatose-1,6-bisphosphate aldolase subunit GatY	6	11	0	61	100	84.7222	inf	4.81835e-05	0.238412	0.000724656	1	1	0	1	1
Give	group_4475		hypothetical protein	6	11	0	61	100	84.7222	inf	4.81835e-05	0.238412	0.000724656	1	1	0	1	1
Give	group_310		hypothetical protein	5	5	1	67	83.3333	93.0556	67	6.75332e-05	0.334154	0.00101259	1	1	1	1	1
Give	group_1157	oadG_2	Oxaloacetate decarboxylase gamma chain	6	12	0	60	100	83.3333	inf	7.22752e-05	0.357618	0.00107716	1	1	0	1	1
Give	group_1207		hypothetical protein	6	13	0	59	100	81.9444	inf	0.000105633	0.522672	0.00154181	1	1	0	1	1
Give	group_1208		hypothetical protein	6	13	0	59	100	81.9444	inf	0.000105633	0.522672	0.00154181	1	1	0	1	1
Give	group_1209		hypothetical protein	6	13	0	59	100	81.9444	inf	0.000105633	0.522672	0.00154181	1	1	0	1	1
Give	group_1212		hypothetical protein	6	13	0	59	100	81.9444	inf	0.000105633	0.522672	0.00154181	1	1	0	1	1
Give	group_21	ymdB_2	hypothetical protein	6	13	0	59	100	81.9444	inf	0.000105633	0.522672	0.00154181	1	1	0	1	1
Give	group_1194		hypothetical protein	6	14	0	58	100	80.5556	inf	0.000150904	0.746674	0.00217056	1	1	0	1	1
Give	group_2434		hypothetical protein	6	14	0	58	100	80.5556	inf	0.000150904	0.746674	0.00217056	1	1	0	1	1
Give	group_3431		hypothetical protein	6	14	0	58	100	80.5556	inf	0.000150904	0.746674	0.00217056	1	1	0	1	1
Give	group_3539	ompN_1	Outer membrane porin N	6	14	0	58	100	80.5556	inf	0.000150904	0.746674	0.00217056	1	1	0	1	1
Give	group_1001		hypothetical protein	6	15	0	57	100	79.1667	inf	0.000211266	1	0.00240863	1	1	0	1	1
Give	group_1140		hypothetical protein	6	15	0	57	100	79.1667	inf	0.000211266	1	0.00240863	1	1	0	1	1
Give	group_1146		hypothetical protein	6	15	0	57	100	79.1667	inf	0.000211266	1	0.00240863	1	1	0	1	1
Give	group_1232		hypothetical protein	6	15	0	57	100	79.1667	inf	0.000211266	1	0.00240863	1	1	0	1	1
Give	subB_2		Subtilase cytotoxin subunit B	6	15	0	57	100	79.1667	inf	0.000211266	1	0.00240863	1	1	0	1	1
Give	group_1308		hypothetical protein	6	15	0	57	100	79.1667	inf	0.000211266	1	0.00240863	1	1	0	1	1
Give	group_1347	fim	Type-1 fimbrial protein, A chain	6	15	0	57	100	79.1667	inf	0.000211266	1	0.00240863	1	1	0	1	1
Give	group_1747		hypothetical protein	6	15	0	57	100	79.1667	inf	0.000211266	1	0.00240863	1	1	0	1	1
Give	group_1941		hypothetical protein	6	15	0	57	100	79.1667	inf	0.000211266	1	0.00240863	1	1	0	1	1
Give	group_1942		hypothetical protein	6	15	0	57	100	79.1667	inf	0.000211266	1	0.00240863	1	1	0	1	1
Give	group_2148		hypothetical protein	6	15	0	57	100	79.1667	inf	0.000211266	1	0.00240863	1	1	0	1	1
Give	group_2168		hypothetical protein	6	15	0	57	100	79.1667	inf	0.000211266	1	0.00240863	1	1	0	1	1
Give	group_2169	dmlR_1	HTH-type transcriptional regulator DmlR	6	15	0	57	100	79.1667	inf	0.000211266	1	0.00240863	1	1	0	1	1
Give	group_2208	pabC	Aminodeoxychorismate lyase	6	15	0	57	100	79.1667	inf	0.000211266	1	0.00240863	1	1	0	1	1
Give	group_2209	fimA_1	Type-1 fimbrial protein, A chain	6	15	0	57	100	79.1667	inf	0.000211266	1	0.00240863	1	1	0	1	1
Give	fimC_1		Chaperone protein FimC	6	15	0	57	100	79.1667	inf	0.000211266	1	0.00240863	1	1	0	1	1
Give	elfC_1		putative outer membrane usher protein ElfC	6	15	0	57	100	79.1667	inf	0.000211266	1	0.00240863	1	1	0	1	1
Give	group_2212		hypothetical protein	6	15	0	57	100	79.1667	inf	0.000211266	1	0.00240863	1	1	0	1	1
Give	fimG_1		Protein FimG	6	15	0	57	100	79.1667	inf	0.000211266	1	0.00240863	1	1	0	1	1
Give	fimG_2		Protein FimG	6	15	0	57	100	79.1667	inf	0.000211266	1	0.00240863	1	1	0	1	1
Give	group_2221	sopD2	Secreted effector protein sopD2	6	15	0	57	100	79.1667	inf	0.000211266	1	0.00240863	1	1	0	1	1
Give	group_2222		hypothetical protein	6	15	0	57	100	79.1667	inf	0.000211266	1	0.00240863	1	1	0	1	1
Give	group_2265	folK	2-amino-4-hydroxy-6-hydroxymethyldihydropteridine pyrophosphokinase	6	15	0	57	100	79.1667	inf	0.000211266	1	0.00240863	1	1	0	1	1
Give	yadN		putative fimbrial-like protein YadN	6	15	0	57	100	79.1667	inf	0.000211266	1	0.00240863	1	1	0	1	1
Give	group_2267	yadV_1	putative fimbrial chaperone YadV	6	15	0	57	100	79.1667	inf	0.000211266	1	0.00240863	1	1	0	1	1
Give	group_2268	htrE	Outer membrane usher protein HtrE	6	15	0	57	100	79.1667	inf	0.000211266	1	0.00240863	1	1	0	1	1
Give	group_2269	yadM	putative fimbrial-like protein YadM	6	15	0	57	100	79.1667	inf	0.000211266	1	0.00240863	1	1	0	1	1
Give	group_2270	yadL	putative fimbrial-like protein YadL	6	15	0	57	100	79.1667	inf	0.000211266	1	0.00240863	1	1	0	1	1
Give	group_2271	yadK	putative fimbrial-like protein YadK	6	15	0	57	100	79.1667	inf	0.000211266	1	0.00240863	1	1	0	1	1
Give	group_2273		hypothetical protein	6	15	0	57	100	79.1667	inf	0.000211266	1	0.00240863	1	1	0	1	1
Give	faeE		Chaperone protein FaeE	6	15	0	57	100	79.1667	inf	0.000211266	1	0.00240863	1	1	0	1	1
Give	xylE		D-xylose-proton symporter	6	15	0	57	100	79.1667	inf	0.000211266	1	0.00240863	1	1	0	1	1
Give	group_2381		hypothetical protein	6	15	0	57	100	79.1667	inf	0.000211266	1	0.00240863	1	1	0	1	1
Give	group_2383	sipD	Cell invasion protein SipD	6	15	0	57	100	79.1667	inf	0.000211266	1	0.00240863	1	1	0	1	1
Give	group_2402		hypothetical protein	6	15	0	57	100	79.1667	inf	0.000211266	1	0.00240863	1	1	0	1	1
Give	uidA		Beta-glucuronidase	6	15	0	57	100	79.1667	inf	0.000211266	1	0.00240863	1	1	0	1	1
Give	uidB		Glucuronide carrier protein	6	15	0	57	100	79.1667	inf	0.000211266	1	0.00240863	1	1	0	1	1
Give	uidC		Membrane-associated protein UidC	6	15	0	57	100	79.1667	inf	0.000211266	1	0.00240863	1	1	0	1	1
Give	group_2407		hypothetical protein	6	15	0	57	100	79.1667	inf	0.000211266	1	0.00240863	1	1	0	1	1
Give	group_2425		hypothetical protein	6	15	0	57	100	79.1667	inf	0.000211266	1	0.00240863	1	1	0	1	1
Give	group_2433		hypothetical protein	6	15	0	57	100	79.1667	inf	0.000211266	1	0.00240863	1	1	0	1	1
Give	group_2560		hypothetical protein	6	15	0	57	100	79.1667	inf	0.000211266	1	0.00240863	1	1	0	1	1
Give	group_2616		hypothetical protein	6	15	0	57	100	79.1667	inf	0.000211266	1	0.00240863	1	1	0	1	1
Give	group_2617		hypothetical protein	6	15	0	57	100	79.1667	inf	0.000211266	1	0.00240863	1	1	0	1	1
Give	group_2620	thiS	Sulfur carrier protein ThiS	6	15	0	57	100	79.1667	inf	0.000211266	1	0.00240863	1	1	0	1	1
Give	group_2621	thiF	Sulfur carrier protein ThiS adenylyltransferase	6	15	0	57	100	79.1667	inf	0.000211266	1	0.00240863	1	1	0	1	1
Give	yafP		putative N-acetyltransferase YafP	6	15	0	57	100	79.1667	inf	0.000211266	1	0.00240863	1	1	0	1	1
Give	group_3425		ISKra4 family transposase ISCep1	6	15	0	57	100	79.1667	inf	0.000211266	1	0.00240863	1	1	0	1	1
Give	rfbD_2		UDP-galactopyranose mutase	6	15	0	57	100	79.1667	inf	0.000211266	1	0.00240863	1	1	0	1	1
Give	group_3427		hypothetical protein	6	15	0	57	100	79.1667	inf	0.000211266	1	0.00240863	1	1	0	1	1
Give	pglA		N,N'-diacetylbacillosaminyl-diphospho-undecaprenol alpha-1,3-N-acetylgalactosaminyltransferase	6	15	0	57	100	79.1667	inf	0.000211266	1	0.00240863	1	1	0	1	1
Give	group_3429		hypothetical protein	6	15	0	57	100	79.1667	inf	0.000211266	1	0.00240863	1	1	0	1	1
Give	tagH		Teichoic acids export ATP-binding protein TagH	6	15	0	57	100	79.1667	inf	0.000211266	1	0.00240863	1	1	0	1	1
Give	group_3432		hypothetical protein	6	15	0	57	100	79.1667	inf	0.000211266	1	0.00240863	1	1	0	1	1
Give	group_451		hypothetical protein	6	15	0	57	100	79.1667	inf	0.000211266	1	0.00240863	1	1	0	1	1
Give	group_646	steC	Secreted effector kinase SteC	6	15	0	57	100	79.1667	inf	0.000211266	1	0.00240863	1	1	0	1	1
Give	group_803		hypothetical protein	6	15	0	57	100	79.1667	inf	0.000211266	1	0.00240863	1	1	0	1	1
Give	group_826		hypothetical protein	6	15	0	57	100	79.1667	inf	0.000211266	1	0.00240863	1	1	0	1	1
Give	group_828		hypothetical protein	6	15	0	57	100	79.1667	inf	0.000211266	1	0.00240863	1	1	0	1	1
Give	group_4562		hypothetical protein	3	0	3	72	50	100	inf	0.000262895	1	0.00299036	1	1	0	1	1
Give	group_1251		hypothetical protein	6	16	0	56	100	77.7778	inf	0.000290491	1	0.00301964	1	1	0	1	1
Give	group_1380		hypothetical protein	6	16	0	56	100	77.7778	inf	0.000290491	1	0.00301964	1	1	0	1	1
Give	group_1386		hypothetical protein	6	16	0	56	100	77.7778	inf	0.000290491	1	0.00301964	1	1	0	1	1
Give	group_1397		hypothetical protein	6	16	0	56	100	77.7778	inf	0.000290491	1	0.00301964	1	1	0	1	1
Give	group_1548	ybdO_2	putative HTH-type transcriptional regulator YbdO	6	16	0	56	100	77.7778	inf	0.000290491	1	0.00301964	1	1	0	1	1
Give	group_1722		hypothetical protein	6	16	0	56	100	77.7778	inf	0.000290491	1	0.00301964	1	1	0	1	1
Give	group_1728	nlhH	Carboxylesterase NlhH	6	16	0	56	100	77.7778	inf	0.000290491	1	0.00301964	1	1	0	1	1
Give	group_2143		hypothetical protein	6	16	0	56	100	77.7778	inf	0.000290491	1	0.00301964	1	1	0	1	1
Give	hlyE		Hemolysin E, chromosomal	6	16	0	56	100	77.7778	inf	0.000290491	1	0.00301964	1	1	0	1	1
Give	cdtB		Cytolethal distending toxin subunit B	6	16	0	56	100	77.7778	inf	0.000290491	1	0.00301964	1	1	0	1	1
Give	group_2196		hypothetical protein	6	16	0	56	100	77.7778	inf	0.000290491	1	0.00301964	1	1	0	1	1
Give	group_2197		hypothetical protein	6	16	0	56	100	77.7778	inf	0.000290491	1	0.00301964	1	1	0	1	1
Give	ptxA		Pertussis toxin subunit 1	6	16	0	56	100	77.7778	inf	0.000290491	1	0.00301964	1	1	0	1	1
Give	subB_1		Subtilase cytotoxin subunit B	6	16	0	56	100	77.7778	inf	0.000290491	1	0.00301964	1	1	0	1	1
Give	yagU		Inner membrane protein YagU	6	16	0	56	100	77.7778	inf	0.000290491	1	0.00301964	1	1	0	1	1
Give	group_2416		hypothetical protein	6	16	0	56	100	77.7778	inf	0.000290491	1	0.00301964	1	1	0	1	1
Give	group_719	sifA_1	Secreted effector protein SifA	6	16	0	56	100	77.7778	inf	0.000290491	1	0.00301964	1	1	0	1	1
Give	group_226		hypothetical protein	6	17	0	55	100	76.3889	inf	0.000393017	1	0.00405135	1	1	0	1	1
Give	group_1002		hypothetical protein	6	18	0	54	100	75	inf	0.000524022	1	0.00530238	1	1	0	1	1
Give	group_1469		hypothetical protein	6	18	0	54	100	75	inf	0.000524022	1	0.00530238	1	1	0	1	1
Give	group_1924		hypothetical protein	6	18	0	54	100	75	inf	0.000524022	1	0.00530238	1	1	0	1	1
Give	group_2088		hypothetical protein	6	18	0	54	100	75	inf	0.000524022	1	0.00530238	1	1	0	1	1
Give	group_2089		hypothetical protein	6	18	0	54	100	75	inf	0.000524022	1	0.00530238	1	1	0	1	1
Give	group_2325	yraJ	Outer membrane usher protein YraJ	6	18	0	54	100	75	inf	0.000524022	1	0.00530238	1	1	0	1	1
Give	group_2326		hypothetical protein	6	18	0	54	100	75	inf	0.000524022	1	0.00530238	1	1	0	1	1
Give	papB		Major pilu subunit operon regulatory protein PapB	6	18	0	54	100	75	inf	0.000524022	1	0.00530238	1	1	0	1	1
Give	group_873	norR_2	Anaerobic nitric oxide reductase transcription regulator NorR	6	18	0	54	100	75	inf	0.000524022	1	0.00530238	1	1	0	1	1
Give	elfG		putative fimbrial-like protein ElfG	6	19	0	53	100	73.6111	inf	0.000689503	1	0.00682332	1	1	0	1	1
Give	group_1408		hypothetical protein	6	19	0	53	100	73.6111	inf	0.000689503	1	0.00682332	1	1	0	1	1
Give	group_1693		hypothetical protein	6	19	0	53	100	73.6111	inf	0.000689503	1	0.00682332	1	1	0	1	1
Give	group_218	ynfE_2	Putative dimethyl sulfoxide reductase chain YnfE	6	19	0	53	100	73.6111	inf	0.000689503	1	0.00682332	1	1	0	1	1
Give	group_2577		hypothetical protein	6	19	0	53	100	73.6111	inf	0.000689503	1	0.00682332	1	1	0	1	1
Give	group_359	dsbE	Thiol:disulfide interchange protein DsbE	6	19	0	53	100	73.6111	inf	0.000689503	1	0.00682332	1	1	0	1	1
Give	group_66		hypothetical protein	6	19	0	53	100	73.6111	inf	0.000689503	1	0.00682332	1	1	0	1	1
Give	fumE		Fumarase E	6	20	0	52	100	72.2222	inf	0.000896354	1	0.00866242	1	1	0	1	1
Give	group_2329		hypothetical protein	6	20	0	52	100	72.2222	inf	0.000896354	1	0.00866242	1	1	0	1	1
Give	coaA_1		Pantothenate kinase	6	20	0	52	100	72.2222	inf	0.000896354	1	0.00866242	1	1	0	1	1
Give	yggF		Fructose-1,6-bisphosphatase 2 class 2	6	20	0	52	100	72.2222	inf	0.000896354	1	0.00866242	1	1	0	1	1
Give	yggP		Mannitol-1-phosphate 5-dehydrogenase	6	20	0	52	100	72.2222	inf	0.000896354	1	0.00866242	1	1	0	1	1
Give	mtlA_1		PTS system mannitol-specific EIICB component	6	20	0	52	100	72.2222	inf	0.000896354	1	0.00866242	1	1	0	1	1
Give	cmtB		Mannitol-specific cryptic phosphotransferase enzyme IIA component	6	20	0	52	100	72.2222	inf	0.000896354	1	0.00866242	1	1	0	1	1
Give	group_991	fimD_3	Outer membrane usher protein FimD	6	20	0	52	100	72.2222	inf	0.000896354	1	0.00866242	1	1	0	1	1
Give	wcaJ_2		hypothetical protein	6	21	0	51	100	70.8333	inf	0.00115246	1	0.0107591	1	1	0	1	1
Give	rmlA		Glucose-1-phosphate thymidylyltransferase	6	21	0	51	100	70.8333	inf	0.00115246	1	0.0107591	1	1	0	1	1
Give	yehA		putative fimbrial-like protein YehA	6	21	0	51	100	70.8333	inf	0.00115246	1	0.0107591	1	1	0	1	1
Give	yehD		putative fimbrial-like protein YehD	6	21	0	51	100	70.8333	inf	0.00115246	1	0.0107591	1	1	0	1	1
Give	rfbD_1		dTDP-4-dehydrorhamnose reductase	6	21	0	51	100	70.8333	inf	0.00115246	1	0.0107591	1	1	0	1	1
Give	rfbB		dTDP-glucose 4,6-dehydratase	6	21	0	51	100	70.8333	inf	0.00115246	1	0.0107591	1	1	0	1	1
Give	group_2753	yehB	Outer membrane usher protein YehB	6	21	0	51	100	70.8333	inf	0.00115246	1	0.0107591	1	1	0	1	1
Give	yehC		putative fimbrial chaperone YehC	6	21	0	51	100	70.8333	inf	0.00115246	1	0.0107591	1	1	0	1	1
Give	group_3037	wecA	Undecaprenyl-phosphate alpha-N-acetylglucosaminyl 1-phosphate transferase	6	21	0	51	100	70.8333	inf	0.00115246	1	0.0107591	1	1	0	1	1
Give	group_648		hypothetical protein	6	21	0	51	100	70.8333	inf	0.00115246	1	0.0107591	1	1	0	1	1
Give	group_989	yadV_2	putative fimbrial chaperone YadV	6	22	0	50	100	69.4444	inf	0.00146676	1	0.0136164	1	1	0	1	1
Give	group_992		hypothetical protein	6	22	0	50	100	69.4444	inf	0.00146676	1	0.0136164	1	1	0	1	1
Give	group_1409		hypothetical protein	6	23	0	49	100	68.0556	inf	0.00184939	1	0.0170089	1	1	0	1	1
Give	malX		PTS system maltose-specific EIICB component	6	23	0	49	100	68.0556	inf	0.00184939	1	0.0170089	1	1	0	1	1
Give	group_2904		hypothetical protein	6	23	0	49	100	68.0556	inf	0.00184939	1	0.0170089	1	1	0	1	1
Give	group_2905		hypothetical protein	6	23	0	49	100	68.0556	inf	0.00184939	1	0.0170089	1	1	0	1	1
Give	group_940		hypothetical protein	6	23	0	49	100	68.0556	inf	0.00184939	1	0.0170089	1	1	0	1	1
Give	yjiK_2		putative protein YjiK	6	24	0	48	100	66.6667	inf	0.00231174	1	0.0202451	1	1	0	1	1
Give	group_1407		hypothetical protein	6	24	0	48	100	66.6667	inf	0.00231174	1	0.0202451	1	1	0	1	1
Give	group_262		hypothetical protein	6	24	0	48	100	66.6667	inf	0.00231174	1	0.0202451	1	1	0	1	1
Give	group_779		hypothetical protein	6	24	0	48	100	66.6667	inf	0.00231174	1	0.0202451	1	1	0	1	1
Give	group_780		hypothetical protein	6	24	0	48	100	66.6667	inf	0.00231174	1	0.0202451	1	1	0	1	1
Give	group_2171		hypothetical protein	6	25	0	47	100	65.2778	inf	0.00286656	1	0.0247535	1	1	0	1	1
Give	group_2615		hypothetical protein	6	25	0	47	100	65.2778	inf	0.00286656	1	0.0247535	1	1	0	1	1
Give	group_493	lip-1	Lipase 1	6	25	0	47	100	65.2778	inf	0.00286656	1	0.0247535	1	1	0	1	1
Give	relE_1		mRNA interferase toxin RelE	6	25	0	47	100	65.2778	inf	0.00286656	1	0.0247535	1	1	0	1	1
Give	malI		Maltose regulon regulatory protein MalI	6	26	0	46	100	63.8889	inf	0.00352808	1	0.0298409	1	1	0	1	1
Give	malY		Protein MalY	6	26	0	46	100	63.8889	inf	0.00352808	1	0.0298409	1	1	0	1	1
Give	group_1984		hypothetical protein	6	26	0	46	100	63.8889	inf	0.00352808	1	0.0298409	1	1	0	1	1
Give	group_2543		hypothetical protein	6	26	0	46	100	63.8889	inf	0.00352808	1	0.0298409	1	1	0	1	1
Give	group_275		hypothetical protein	6	26	0	46	100	63.8889	inf	0.00352808	1	0.0298409	1	1	0	1	1
Give	group_333		hypothetical protein	6	27	0	45	100	62.5	inf	0.00431209	1	0.0362245	1	1	0	1	1
Give	rayT		REP-associated tyrosine transposase	6	27	0	45	100	62.5	inf	0.00431209	1	0.0362245	1	1	0	1	1
Give	group_1042		hypothetical protein	6	28	0	44	100	61.1111	inf	0.00523611	1	0.0422647	1	1	0	1	1
Give	group_1043		hypothetical protein	6	28	0	44	100	61.1111	inf	0.00523611	1	0.0422647	1	1	0	1	1
Give	group_1898		hypothetical protein	6	28	0	44	100	61.1111	inf	0.00523611	1	0.0422647	1	1	0	1	1
Give	hin		DNA-invertase hin	6	28	0	44	100	61.1111	inf	0.00523611	1	0.0422647	1	1	0	1	1
Give	group_248		hypothetical protein	6	28	0	44	100	61.1111	inf	0.00523611	1	0.0422647	1	1	0	1	1
Give	group_277		hypothetical protein	6	28	0	44	100	61.1111	inf	0.00523611	1	0.0422647	1	1	0	1	1
Give	group_291		hypothetical protein	6	28	0	44	100	61.1111	inf	0.00523611	1	0.0422647	1	1	0	1	1
Give	fliD		Flagellar hook-associated protein 2	6	28	0	44	100	61.1111	inf	0.00523611	1	0.0422647	1	1	0	1	1
Give	group_436		hypothetical protein	6	28	0	44	100	61.1111	inf	0.00523611	1	0.0422647	1	1	0	1	1
Give	group_549		IS3 family transposase ISSen1	6	28	0	44	100	61.1111	inf	0.00523611	1	0.0422647	1	1	0	1	1
Give	fljB_2		Phase 2 flagellin	6	28	0	44	100	61.1111	inf	0.00523611	1	0.0422647	1	1	0	1	1
Give	group_597		hypothetical protein	6	28	0	44	100	61.1111	inf	0.00523611	1	0.0422647	1	1	0	1	1
Give	group_60	fljB_2	Phase 2 flagellin	6	28	0	44	100	61.1111	inf	0.00523611	1	0.0422647	1	1	0	1	1
Give	group_717		hypothetical protein	6	28	0	44	100	61.1111	inf	0.00523611	1	0.0422647	1	1	0	1	1
Give	group_270		hypothetical protein	6	29	0	43	100	59.7222	inf	0.00631945	1	0.0493975	1	1	0	1	1
Give	ccmH		Cytochrome c-type biogenesis protein CcmH	6	29	0	43	100	59.7222	inf	0.00631945	1	0.0493975	1	1	0	1	1
Give	group_651	nifJ	Pyruvate-flavodoxin oxidoreductase	6	29	0	43	100	59.7222	inf	0.00631945	1	0.0493975	1	1	0	1	1
Give	group_686	add	Adenosine deaminase	6	29	0	43	100	59.7222	inf	0.00631945	1	0.0493975	1	1	0	1	1
Give	group_950	amyA	Cytoplasmic alpha-amylase	6	29	0	43	100	59.7222	inf	0.00631945	1	0.0493975	1	1	0	1	1
Hartford	group_1225		hypothetical protein	7	0	0	71	100	100	inf	3.78515e-10	1.87289e-06	2.2565e-08	1	1	0	1	1
Hartford	group_2137		hypothetical protein	7	0	0	71	100	100	inf	3.78515e-10	1.87289e-06	2.2565e-08	1	1	0	1	1
Hartford	group_239		hypothetical protein	7	0	0	71	100	100	inf	3.78515e-10	1.87289e-06	2.2565e-08	1	1	0	1	1
Hartford	group_284		hypothetical protein	7	0	0	71	100	100	inf	3.78515e-10	1.87289e-06	2.2565e-08	1	1	0	1	1
Hartford	group_37	oadB_3	Oxaloacetate decarboxylase beta chain	7	0	0	71	100	100	inf	3.78515e-10	1.87289e-06	2.2565e-08	1	1	0	1	1
Hartford	group_537		hypothetical protein	7	0	0	71	100	100	inf	3.78515e-10	1.87289e-06	2.2565e-08	1	1	0	1	1
Hartford	group_5375		hypothetical protein	7	0	0	71	100	100	inf	3.78515e-10	1.87289e-06	2.2565e-08	1	1	0	1	1
Hartford	group_5376		hypothetical protein	7	0	0	71	100	100	inf	3.78515e-10	1.87289e-06	2.2565e-08	1	1	0	1	1
Hartford	group_5377		hypothetical protein	7	0	0	71	100	100	inf	3.78515e-10	1.87289e-06	2.2565e-08	1	1	0	1	1
Hartford	group_5378		hypothetical protein	7	0	0	71	100	100	inf	3.78515e-10	1.87289e-06	2.2565e-08	1	1	0	1	1
Hartford	group_5379		hypothetical protein	7	0	0	71	100	100	inf	3.78515e-10	1.87289e-06	2.2565e-08	1	1	0	1	1
Hartford	group_5380		hypothetical protein	7	0	0	71	100	100	inf	3.78515e-10	1.87289e-06	2.2565e-08	1	1	0	1	1
Hartford	group_5381		hypothetical protein	7	0	0	71	100	100	inf	3.78515e-10	1.87289e-06	2.2565e-08	1	1	0	1	1
Hartford	recD2		ATP-dependent RecD-like DNA helicase	7	0	0	71	100	100	inf	3.78515e-10	1.87289e-06	2.2565e-08	1	1	0	1	1
Hartford	group_5383		hypothetical protein	7	0	0	71	100	100	inf	3.78515e-10	1.87289e-06	2.2565e-08	1	1	0	1	1
Hartford	group_5384		hypothetical protein	7	0	0	71	100	100	inf	3.78515e-10	1.87289e-06	2.2565e-08	1	1	0	1	1
Hartford	group_5385		hypothetical protein	7	0	0	71	100	100	inf	3.78515e-10	1.87289e-06	2.2565e-08	1	1	0	1	1
Hartford	group_5386		hypothetical protein	7	0	0	71	100	100	inf	3.78515e-10	1.87289e-06	2.2565e-08	1	1	0	1	1
Hartford	group_5387		hypothetical protein	7	0	0	71	100	100	inf	3.78515e-10	1.87289e-06	2.2565e-08	1	1	0	1	1
Hartford	group_5388		hypothetical protein	7	0	0	71	100	100	inf	3.78515e-10	1.87289e-06	2.2565e-08	1	1	0	1	1
Hartford	group_5389		hypothetical protein	7	0	0	71	100	100	inf	3.78515e-10	1.87289e-06	2.2565e-08	1	1	0	1	1
Hartford	group_5390		hypothetical protein	7	0	0	71	100	100	inf	3.78515e-10	1.87289e-06	2.2565e-08	1	1	0	1	1
Hartford	group_5391		hypothetical protein	7	0	0	71	100	100	inf	3.78515e-10	1.87289e-06	2.2565e-08	1	1	0	1	1
Hartford	group_5392		hypothetical protein	7	0	0	71	100	100	inf	3.78515e-10	1.87289e-06	2.2565e-08	1	1	0	1	1
Hartford	group_5393		hypothetical protein	7	0	0	71	100	100	inf	3.78515e-10	1.87289e-06	2.2565e-08	1	1	0	1	1
Hartford	group_5394		hypothetical protein	7	0	0	71	100	100	inf	3.78515e-10	1.87289e-06	2.2565e-08	1	1	0	1	1
Hartford	group_5395		hypothetical protein	7	0	0	71	100	100	inf	3.78515e-10	1.87289e-06	2.2565e-08	1	1	0	1	1
Hartford	group_5396		hypothetical protein	7	0	0	71	100	100	inf	3.78515e-10	1.87289e-06	2.2565e-08	1	1	0	1	1
Hartford	group_5397		hypothetical protein	7	0	0	71	100	100	inf	3.78515e-10	1.87289e-06	2.2565e-08	1	1	0	1	1
Hartford	group_5398		hypothetical protein	7	0	0	71	100	100	inf	3.78515e-10	1.87289e-06	2.2565e-08	1	1	0	1	1
Hartford	group_5399		hypothetical protein	7	0	0	71	100	100	inf	3.78515e-10	1.87289e-06	2.2565e-08	1	1	0	1	1
Hartford	group_5400		hypothetical protein	7	0	0	71	100	100	inf	3.78515e-10	1.87289e-06	2.2565e-08	1	1	0	1	1
Hartford	ykfI		Toxin YkfI	7	0	0	71	100	100	inf	3.78515e-10	1.87289e-06	2.2565e-08	1	1	0	1	1
Hartford	yfjZ		Antitoxin YfjZ	7	0	0	71	100	100	inf	3.78515e-10	1.87289e-06	2.2565e-08	1	1	0	1	1
Hartford	group_5403		hypothetical protein	7	0	0	71	100	100	inf	3.78515e-10	1.87289e-06	2.2565e-08	1	1	0	1	1
Hartford	group_5404		hypothetical protein	7	0	0	71	100	100	inf	3.78515e-10	1.87289e-06	2.2565e-08	1	1	0	1	1
Hartford	group_5405		hypothetical protein	7	0	0	71	100	100	inf	3.78515e-10	1.87289e-06	2.2565e-08	1	1	0	1	1
Hartford	group_5406		hypothetical protein	7	0	0	71	100	100	inf	3.78515e-10	1.87289e-06	2.2565e-08	1	1	0	1	1
Hartford	group_5433		hypothetical protein	7	0	0	71	100	100	inf	3.78515e-10	1.87289e-06	2.2565e-08	1	1	0	1	1
Hartford	group_5434		hypothetical protein	7	0	0	71	100	100	inf	3.78515e-10	1.87289e-06	2.2565e-08	1	1	0	1	1
Hartford	group_5435		hypothetical protein	7	0	0	71	100	100	inf	3.78515e-10	1.87289e-06	2.2565e-08	1	1	0	1	1
Hartford	group_5437		hypothetical protein	7	0	0	71	100	100	inf	3.78515e-10	1.87289e-06	2.2565e-08	1	1	0	1	1
Hartford	group_5438		hypothetical protein	7	0	0	71	100	100	inf	3.78515e-10	1.87289e-06	2.2565e-08	1	1	0	1	1
Hartford	group_5453		hypothetical protein	7	0	0	71	100	100	inf	3.78515e-10	1.87289e-06	2.2565e-08	1	1	0	1	1
Hartford	group_5455		hypothetical protein	7	0	0	71	100	100	inf	3.78515e-10	1.87289e-06	2.2565e-08	1	1	0	1	1
Hartford	group_5459	intA_2	Prophage integrase IntA	7	0	0	71	100	100	inf	3.78515e-10	1.87289e-06	2.2565e-08	1	1	0	1	1
Hartford	group_5460	intA_3	Prophage integrase IntA	7	0	0	71	100	100	inf	3.78515e-10	1.87289e-06	2.2565e-08	1	1	0	1	1
Hartford	group_5461		hypothetical protein	7	0	0	71	100	100	inf	3.78515e-10	1.87289e-06	2.2565e-08	1	1	0	1	1
Hartford	group_5462		hypothetical protein	7	0	0	71	100	100	inf	3.78515e-10	1.87289e-06	2.2565e-08	1	1	0	1	1
Hartford	group_5463		hypothetical protein	7	0	0	71	100	100	inf	3.78515e-10	1.87289e-06	2.2565e-08	1	1	0	1	1
Hartford	group_5464		hypothetical protein	7	0	0	71	100	100	inf	3.78515e-10	1.87289e-06	2.2565e-08	1	1	0	1	1
Hartford	group_5465		hypothetical protein	7	0	0	71	100	100	inf	3.78515e-10	1.87289e-06	2.2565e-08	1	1	0	1	1
Hartford	group_5466		hypothetical protein	7	0	0	71	100	100	inf	3.78515e-10	1.87289e-06	2.2565e-08	1	1	0	1	1
Hartford	group_5467		hypothetical protein	7	0	0	71	100	100	inf	3.78515e-10	1.87289e-06	2.2565e-08	1	1	0	1	1
Hartford	group_5468		hypothetical protein	7	0	0	71	100	100	inf	3.78515e-10	1.87289e-06	2.2565e-08	1	1	0	1	1
Hartford	group_5469		hypothetical protein	7	0	0	71	100	100	inf	3.78515e-10	1.87289e-06	2.2565e-08	1	1	0	1	1
Hartford	group_5470		hypothetical protein	7	0	0	71	100	100	inf	3.78515e-10	1.87289e-06	2.2565e-08	1	1	0	1	1
Hartford	cdiI4		Immunity protein CdiI-o11	7	0	0	71	100	100	inf	3.78515e-10	1.87289e-06	2.2565e-08	1	1	0	1	1
Hartford	group_5478		hypothetical protein	7	0	0	71	100	100	inf	3.78515e-10	1.87289e-06	2.2565e-08	1	1	0	1	1
Hartford	group_5515	xerC_2	Tyrosine recombinase XerC	7	0	0	71	100	100	inf	3.78515e-10	1.87289e-06	2.2565e-08	1	1	0	1	1
Hartford	group_5516		hypothetical protein	7	0	0	71	100	100	inf	3.78515e-10	1.87289e-06	2.2565e-08	1	1	0	1	1
Hartford	group_5517		hypothetical protein	7	0	0	71	100	100	inf	3.78515e-10	1.87289e-06	2.2565e-08	1	1	0	1	1
Hartford	umuC_4		Protein UmuC	7	0	0	71	100	100	inf	3.78515e-10	1.87289e-06	2.2565e-08	1	1	0	1	1
Hartford	umuD_1		Protein UmuD	7	0	0	71	100	100	inf	3.78515e-10	1.87289e-06	2.2565e-08	1	1	0	1	1
Hartford	group_5520		hypothetical protein	7	0	0	71	100	100	inf	3.78515e-10	1.87289e-06	2.2565e-08	1	1	0	1	1
Hartford	ompX_2		Outer membrane protein X	7	0	0	71	100	100	inf	3.78515e-10	1.87289e-06	2.2565e-08	1	1	0	1	1
Hartford	group_5522		hypothetical protein	7	0	0	71	100	100	inf	3.78515e-10	1.87289e-06	2.2565e-08	1	1	0	1	1
Hartford	group_5525		hypothetical protein	7	0	0	71	100	100	inf	3.78515e-10	1.87289e-06	2.2565e-08	1	1	0	1	1
Hartford	group_5526		hypothetical protein	7	0	0	71	100	100	inf	3.78515e-10	1.87289e-06	2.2565e-08	1	1	0	1	1
Hartford	nemA_2		N-ethylmaleimide reductase	7	0	0	71	100	100	inf	3.78515e-10	1.87289e-06	2.2565e-08	1	1	0	1	1
Hartford	umuC_2		Protein UmuC	7	0	0	71	100	100	inf	3.78515e-10	1.87289e-06	2.2565e-08	1	1	0	1	1
Hartford	pspA_2		Phosphoserine phosphatase 1	7	0	0	71	100	100	inf	3.78515e-10	1.87289e-06	2.2565e-08	1	1	0	1	1
Hartford	group_5530		hypothetical protein	7	0	0	71	100	100	inf	3.78515e-10	1.87289e-06	2.2565e-08	1	1	0	1	1
Hartford	group_5531		hypothetical protein	7	0	0	71	100	100	inf	3.78515e-10	1.87289e-06	2.2565e-08	1	1	0	1	1
Hartford	group_5532		hypothetical protein	7	0	0	71	100	100	inf	3.78515e-10	1.87289e-06	2.2565e-08	1	1	0	1	1
Hartford	group_5533		hypothetical protein	7	0	0	71	100	100	inf	3.78515e-10	1.87289e-06	2.2565e-08	1	1	0	1	1
Hartford	group_5536		hypothetical protein	7	0	0	71	100	100	inf	3.78515e-10	1.87289e-06	2.2565e-08	1	1	0	1	1
Hartford	group_5537		hypothetical protein	7	0	0	71	100	100	inf	3.78515e-10	1.87289e-06	2.2565e-08	1	1	0	1	1
Hartford	group_5538		hypothetical protein	7	0	0	71	100	100	inf	3.78515e-10	1.87289e-06	2.2565e-08	1	1	0	1	1
Hartford	group_5539		IS110 family transposase ISCfr13	7	0	0	71	100	100	inf	3.78515e-10	1.87289e-06	2.2565e-08	1	1	0	1	1
Hartford	group_1785		hypothetical protein	7	1	0	70	100	98.5915	inf	3.02812e-09	1.49831e-05	1.74223e-07	1	1	0	1	1
Hartford	group_1972		hypothetical protein	7	1	0	70	100	98.5915	inf	3.02812e-09	1.49831e-05	1.74223e-07	1	1	0	1	1
Hartford	group_986		hypothetical protein	7	1	0	70	100	98.5915	inf	3.02812e-09	1.49831e-05	1.74223e-07	1	1	0	1	1
Hartford	group_2141		hypothetical protein	6	0	1	71	85.7143	100	inf	2.72531e-08	0.000134848	1.376e-06	1	1	0	1	1
Hartford	group_231		hypothetical protein	6	0	1	71	85.7143	100	inf	2.72531e-08	0.000134848	1.376e-06	1	1	0	1	1
Hartford	group_5436		hypothetical protein	6	0	1	71	85.7143	100	inf	2.72531e-08	0.000134848	1.376e-06	1	1	0	1	1
Hartford	group_5454		hypothetical protein	6	0	1	71	85.7143	100	inf	2.72531e-08	0.000134848	1.376e-06	1	1	0	1	1
Hartford	group_5471		hypothetical protein	6	0	1	71	85.7143	100	inf	2.72531e-08	0.000134848	1.376e-06	1	1	0	1	1
Hartford	group_5474		hypothetical protein	6	0	1	71	85.7143	100	inf	2.72531e-08	0.000134848	1.376e-06	1	1	0	1	1
Hartford	group_5476		hypothetical protein	6	0	1	71	85.7143	100	inf	2.72531e-08	0.000134848	1.376e-06	1	1	0	1	1
Hartford	group_5477		hypothetical protein	6	0	1	71	85.7143	100	inf	2.72531e-08	0.000134848	1.376e-06	1	1	0	1	1
Hartford	group_5523		hypothetical protein	6	0	1	71	85.7143	100	inf	2.72531e-08	0.000134848	1.376e-06	1	1	0	1	1
Hartford	group_5524		hypothetical protein	6	0	1	71	85.7143	100	inf	2.72531e-08	0.000134848	1.376e-06	1	1	0	1	1
Hartford	group_5535		hypothetical protein	6	0	1	71	85.7143	100	inf	2.72531e-08	0.000134848	1.376e-06	1	1	0	1	1
Hartford	group_190		hypothetical protein	7	3	0	68	100	95.7746	inf	4.54218e-08	0.000224747	2.14045e-06	1	1	0	1	1
Hartford	group_1900		hypothetical protein	7	3	0	68	100	95.7746	inf	4.54218e-08	0.000224747	2.14045e-06	1	1	0	1	1
Hartford	group_1931	oadG_3	Oxaloacetate decarboxylase gamma chain	7	3	0	68	100	95.7746	inf	4.54218e-08	0.000224747	2.14045e-06	1	1	0	1	1
Hartford	group_382		hypothetical protein	7	3	0	68	100	95.7746	inf	4.54218e-08	0.000224747	2.14045e-06	1	1	0	1	1
Hartford	group_6	oadA_2	Oxaloacetate decarboxylase alpha chain	7	3	0	68	100	95.7746	inf	4.54218e-08	0.000224747	2.14045e-06	1	1	0	1	1
Hartford	group_1759		hypothetical protein	7	4	0	67	100	94.3662	inf	1.2491e-07	0.000618055	5.02483e-06	1	1	0	1	1
Hartford	group_1964		hypothetical protein	7	4	0	67	100	94.3662	inf	1.2491e-07	0.000618055	5.02483e-06	1	1	0	1	1
Hartford	group_2117		hypothetical protein	7	4	0	67	100	94.3662	inf	1.2491e-07	0.000618055	5.02483e-06	1	1	0	1	1
Hartford	group_2118		hypothetical protein	7	4	0	67	100	94.3662	inf	1.2491e-07	0.000618055	5.02483e-06	1	1	0	1	1
Hartford	group_2119		hypothetical protein	7	4	0	67	100	94.3662	inf	1.2491e-07	0.000618055	5.02483e-06	1	1	0	1	1
Hartford	group_2120		hypothetical protein	7	4	0	67	100	94.3662	inf	1.2491e-07	0.000618055	5.02483e-06	1	1	0	1	1
Hartford	fhuA_2		Ferrichrome outer membrane transporter/phage receptor	7	4	0	67	100	94.3662	inf	1.2491e-07	0.000618055	5.02483e-06	1	1	0	1	1
Hartford	yigG		Inner membrane protein YigG	7	4	0	67	100	94.3662	inf	1.2491e-07	0.000618055	5.02483e-06	1	1	0	1	1
Hartford	group_4688		hypothetical protein	7	4	0	67	100	94.3662	inf	1.2491e-07	0.000618055	5.02483e-06	1	1	0	1	1
Hartford	group_4708		IS3 family transposase ISEhe3	7	4	0	67	100	94.3662	inf	1.2491e-07	0.000618055	5.02483e-06	1	1	0	1	1
Hartford	group_4744		hypothetical protein	7	4	0	67	100	94.3662	inf	1.2491e-07	0.000618055	5.02483e-06	1	1	0	1	1
Hartford	group_4768		hypothetical protein	7	4	0	67	100	94.3662	inf	1.2491e-07	0.000618055	5.02483e-06	1	1	0	1	1
Hartford	group_4831		IS3 family transposase ISEhe3	7	4	0	67	100	94.3662	inf	1.2491e-07	0.000618055	5.02483e-06	1	1	0	1	1
Hartford	group_606	cusA	hypothetical protein	7	4	0	67	100	94.3662	inf	1.2491e-07	0.000618055	5.02483e-06	1	1	0	1	1
Hartford	ccmA_2		Cytochrome c biogenesis ATP-binding export protein CcmA	7	4	0	67	100	94.3662	inf	1.2491e-07	0.000618055	5.02483e-06	1	1	0	1	1
Hartford	oadA_3		Oxaloacetate decarboxylase alpha chain	6	1	1	70	85.7143	98.5915	420	1.88501e-07	0.000932701	7.52178e-06	1	1	1	1	1
Hartford	group_1857		hypothetical protein	7	5	0	66	100	92.9577	inf	2.99784e-07	0.00148333	1.09068e-05	1	1	0	1	1
Hartford	group_1899		hypothetical protein	7	5	0	66	100	92.9577	inf	2.99784e-07	0.00148333	1.09068e-05	1	1	0	1	1
Hartford	group_2067		hypothetical protein	7	5	0	66	100	92.9577	inf	2.99784e-07	0.00148333	1.09068e-05	1	1	0	1	1
Hartford	group_2076		hypothetical protein	7	5	0	66	100	92.9577	inf	2.99784e-07	0.00148333	1.09068e-05	1	1	0	1	1
Hartford	group_2125		hypothetical protein	7	5	0	66	100	92.9577	inf	2.99784e-07	0.00148333	1.09068e-05	1	1	0	1	1
Hartford	group_3454		hypothetical protein	7	5	0	66	100	92.9577	inf	2.99784e-07	0.00148333	1.09068e-05	1	1	0	1	1
Hartford	panS		Pantothenate precursors transporter PanS	7	5	0	66	100	92.9577	inf	2.99784e-07	0.00148333	1.09068e-05	1	1	0	1	1
Hartford	group_1833		hypothetical protein	7	6	0	65	100	91.5493	inf	6.49532e-07	0.00321388	2.0255e-05	1	1	0	1	1
Hartford	group_2126		hypothetical protein	7	6	0	65	100	91.5493	inf	6.49532e-07	0.00321388	2.0255e-05	1	1	0	1	1
Hartford	group_3458		hypothetical protein	7	6	0	65	100	91.5493	inf	6.49532e-07	0.00321388	2.0255e-05	1	1	0	1	1
Hartford	group_4874		hypothetical protein	7	6	0	65	100	91.5493	inf	6.49532e-07	0.00321388	2.0255e-05	1	1	0	1	1
Hartford	ybdM_2		putative protein YbdM	7	6	0	65	100	91.5493	inf	6.49532e-07	0.00321388	2.0255e-05	1	1	0	1	1
Hartford	group_4876		hypothetical protein	7	6	0	65	100	91.5493	inf	6.49532e-07	0.00321388	2.0255e-05	1	1	0	1	1
Hartford	group_4877		hypothetical protein	7	6	0	65	100	91.5493	inf	6.49532e-07	0.00321388	2.0255e-05	1	1	0	1	1
Hartford	group_4878		hypothetical protein	7	6	0	65	100	91.5493	inf	6.49532e-07	0.00321388	2.0255e-05	1	1	0	1	1
Hartford	group_4879		hypothetical protein	7	6	0	65	100	91.5493	inf	6.49532e-07	0.00321388	2.0255e-05	1	1	0	1	1
Hartford	group_4881		hypothetical protein	7	6	0	65	100	91.5493	inf	6.49532e-07	0.00321388	2.0255e-05	1	1	0	1	1
Hartford	group_4882	ccdB	Toxin CcdB	7	6	0	65	100	91.5493	inf	6.49532e-07	0.00321388	2.0255e-05	1	1	0	1	1
Hartford	group_4883		hypothetical protein	7	6	0	65	100	91.5493	inf	6.49532e-07	0.00321388	2.0255e-05	1	1	0	1	1
Hartford	group_4884		hypothetical protein	7	6	0	65	100	91.5493	inf	6.49532e-07	0.00321388	2.0255e-05	1	1	0	1	1
Hartford	group_4885		hypothetical protein	7	6	0	65	100	91.5493	inf	6.49532e-07	0.00321388	2.0255e-05	1	1	0	1	1
Hartford	group_4886		hypothetical protein	7	6	0	65	100	91.5493	inf	6.49532e-07	0.00321388	2.0255e-05	1	1	0	1	1
Hartford	group_831	mug	G/U mismatch-specific DNA glycosylase	7	6	0	65	100	91.5493	inf	6.49532e-07	0.00321388	2.0255e-05	1	1	0	1	1
Hartford	group_912	yqjH	NADPH-dependent ferric-chelate reductase	7	6	0	65	100	91.5493	inf	6.49532e-07	0.00321388	2.0255e-05	1	1	0	1	1
Hartford	clpV1_1		Protein ClpV1	5	0	2	71	71.4286	100	inf	9.94738e-07	0.00492196	2.0255e-05	1	1	0	1	1
Hartford	group_1221		hypothetical protein	5	0	2	71	71.4286	100	inf	9.94738e-07	0.00492196	2.0255e-05	1	1	0	1	1
Hartford	group_2139		hypothetical protein	5	0	2	71	71.4286	100	inf	9.94738e-07	0.00492196	2.0255e-05	1	1	0	1	1
Hartford	group_2140		hypothetical protein	5	0	2	71	71.4286	100	inf	9.94738e-07	0.00492196	2.0255e-05	1	1	0	1	1
Hartford	group_283		hypothetical protein	5	0	2	71	71.4286	100	inf	9.94738e-07	0.00492196	2.0255e-05	1	1	0	1	1
Hartford	group_338	umuC_1	Protein UmuC	5	0	2	71	71.4286	100	inf	9.94738e-07	0.00492196	2.0255e-05	1	1	0	1	1
Hartford	group_520		hypothetical protein	5	0	2	71	71.4286	100	inf	9.94738e-07	0.00492196	2.0255e-05	1	1	0	1	1
Hartford	group_5408		hypothetical protein	5	0	2	71	71.4286	100	inf	9.94738e-07	0.00492196	2.0255e-05	1	1	0	1	1
Hartford	group_5409		hypothetical protein	5	0	2	71	71.4286	100	inf	9.94738e-07	0.00492196	2.0255e-05	1	1	0	1	1
Hartford	group_5410		hypothetical protein	5	0	2	71	71.4286	100	inf	9.94738e-07	0.00492196	2.0255e-05	1	1	0	1	1
Hartford	group_5411		hypothetical protein	5	0	2	71	71.4286	100	inf	9.94738e-07	0.00492196	2.0255e-05	1	1	0	1	1
Hartford	group_5412	rrrD	Lysozyme RrrD	5	0	2	71	71.4286	100	inf	9.94738e-07	0.00492196	2.0255e-05	1	1	0	1	1
Hartford	group_5413		hypothetical protein	5	0	2	71	71.4286	100	inf	9.94738e-07	0.00492196	2.0255e-05	1	1	0	1	1
Hartford	group_5414		hypothetical protein	5	0	2	71	71.4286	100	inf	9.94738e-07	0.00492196	2.0255e-05	1	1	0	1	1
Hartford	group_5415		hypothetical protein	5	0	2	71	71.4286	100	inf	9.94738e-07	0.00492196	2.0255e-05	1	1	0	1	1
Hartford	group_5416		hypothetical protein	5	0	2	71	71.4286	100	inf	9.94738e-07	0.00492196	2.0255e-05	1	1	0	1	1
Hartford	group_5417		hypothetical protein	5	0	2	71	71.4286	100	inf	9.94738e-07	0.00492196	2.0255e-05	1	1	0	1	1
Hartford	group_5418		hypothetical protein	5	0	2	71	71.4286	100	inf	9.94738e-07	0.00492196	2.0255e-05	1	1	0	1	1
Hartford	group_5419		hypothetical protein	5	0	2	71	71.4286	100	inf	9.94738e-07	0.00492196	2.0255e-05	1	1	0	1	1
Hartford	group_5420		hypothetical protein	5	0	2	71	71.4286	100	inf	9.94738e-07	0.00492196	2.0255e-05	1	1	0	1	1
Hartford	group_5421		hypothetical protein	5	0	2	71	71.4286	100	inf	9.94738e-07	0.00492196	2.0255e-05	1	1	0	1	1
Hartford	group_5422		hypothetical protein	5	0	2	71	71.4286	100	inf	9.94738e-07	0.00492196	2.0255e-05	1	1	0	1	1
Hartford	group_5423		hypothetical protein	5	0	2	71	71.4286	100	inf	9.94738e-07	0.00492196	2.0255e-05	1	1	0	1	1
Hartford	group_5424		hypothetical protein	5	0	2	71	71.4286	100	inf	9.94738e-07	0.00492196	2.0255e-05	1	1	0	1	1
[truncated: 2,340 more rows]

## Sheet: summary
The significantly associated genes with each serovars by Scoary
Serotype	Significantly associated genes
S. Anatum	117
S. Berta	43
S. Braenderup	304
S. Cerro	746
S. Enteritidis	153
S. Give	472
S. Hartford	626
S. Montevideo	311
S. Muenchen	110
S. Newport	946
S. Oranienburg	510
Total	4338
