# Supplementary material for: Genomic Diversity, Antimicrobial Resistance, Plasmidome, and Virulence Profiles of Salmonella Isolated from Small Specialty Crop Farms Revealed by Whole-Genome Sequencing
Source: Antibiotics (Basel). 2023 Nov 18;12(11):1637. doi: 10.3390/antibiotics12111637 (PMC10668983; doi:10.3390/antibiotics12111637)
Supplement: Supplementary file 1 [file antibiotics-12-01637-s001.zip › supplemntary Table S4.plasmids.xlsx]

## Sheet: Sheet1
sample_id_1	sample_id_2	Plasmid	num_contigs	size	gc	rep_type(s)	rep_type_accession(s)	relaxase_type(s)	relaxase_type_accession(s)	mpf_type	mpf_type_accession(s)	orit_type(s)	orit_accession(s)	predicted_mobility	primary_cluster_id	secondary_cluster_id	predicted_host_range_overall_name	observed_host_range_ncbi_name	reported_host_range_lit_name
AG21-0050	AG21-0050	AA149	1	6092	48.1123	rep_cluster_2335	KU302809_00001	MOBP	NC_011404_00002	-	-	MOBP	HQ328804	mobilizable	AA149	-	Actinobacteria,Firmicutes,Proteobacteria	Actinobacteria,Firmicutes,Proteobacteria	Enterobacterales
AG21-0050	AG21-0050	AB039	1	4223	55.5766	ColRNAI_rep_cluster_1987	CP041116_00002	MOBP,MOBP	NC_013090_00004,CP011605_00002	-	-	MOBP	CP007070	mobilizable	AB039	AJ577	Actinobacteria,Proteobacteria	Actinobacteria,Proteobacteria	-
AG21-0051	AG21-0051	AA631	2	118998	49.521	IncC,IncFII,IncX1	000092__CP025470,000114__CP015527,000217__NC_019106_00041	MOBF,MOBP	CP030220_00041,NC_019096_00001	MPF_T	NC_017624_00009,NC_010860_00022,NC_019067_00043,NC_013503_00034,NC_023277_00163,NC_012885_00167	MOBH	JQ319772	conjugative	AA631	AI894	Proteobacteria	Gammaproteobacteria	Proteobacteria
AG21-0051	AG21-0051	AA627	2	42874	53.0788	-	-	MOBH,MOBH	NC_012690_00071,NC_012885_00072	MPF_F	NC_016974_00085,NC_012885_00083,NC_014170_00023,NC_009140_00071	-	-	conjugative	AA627	AI885	Enterobacteriaceae	Enterobacteriaceae	-
AG21-0056	AG21-0056	AC027	2	55921	48.8028	IncI-gamma/K1	MG764547	MOBP	NC_019097	MPF_I	NC_019097_00056	MOBP	JN253636	conjugative	AC027	AL046	Enterobacterales	Enterobacteriaceae	Enterobacterales
AG21-0056	AG21-0056	AC357	2	49025	44.3916	IncFIC,IncFII	CP003035,JQ418521	MOBP	JQ418521_00047	MPF_T	NC_019343_00011,NC_019343_00015,NC_019343_00016,NC_019343_00017,NC_019343_00022	-	-	conjugative	AC357	AL523	Salmonella	Salmonella	-
AG21-0056	AG21-0056	AB038	1	2373	52.086	rep_cluster_2335	KU302809_00001	-	-	-	-	MOBP	HQ328804	mobilizable	AB038	AJ574	Actinobacteria,Firmicutes,Proteobacteria	Actinobacteria,Firmicutes,Proteobacteria	Enterobacterales
AG21-0060	AG21-0060	AB461	3	57203	51.777	IncFIB,IncFII	000101__NZ_CP012345_00042,000114__CP015527	-	-	MPF_F	NC_019094_00090,NC_019002_00072,NC_022651_00077,NC_019002_00076	-	-	non-mobilizable	AB461	AK250	Enterobacterales	Enterobacterales	Enterobacterales
AG21-0066	AG21-0066	AB461	3	57193	51.7703	IncFIB,IncFII	000101__NZ_CP012345_00042,000114__CP015527	-	-	MPF_F	NC_022651_00077,NC_019002_00072,NC_019094_00090,NC_019002_00076	-	-	non-mobilizable	AB461	AK250	Enterobacterales	Enterobacterales	Enterobacterales
AG21-0559	AG21-0559	AC027	3	56181	48.8083	IncI-gamma/K1	MG764547	MOBP	NC_019097	MPF_I	NC_019097_00056	MOBP	JN253636	conjugative	AC027	AL046	Enterobacterales	Enterobacteriaceae	Enterobacterales
AG21-0560	AG21-0560	AC027	3	56181	48.8083	IncI-gamma/K1	MG764547	MOBP	NC_019097	MPF_I	NC_019097_00056	MOBP	JN253636	conjugative	AC027	AL046	Enterobacterales	Enterobacteriaceae	Enterobacterales
AG21-0561	AG21-0561	AC027	3	56181	48.8083	IncI-gamma/K1	MG764547	MOBP	NC_019097	MPF_I	NC_019097_00056	MOBP	JN253636	conjugative	AC027	AL046	Enterobacterales	Enterobacteriaceae	Enterobacterales
AG21-0562	AG21-0562	AC027	3	56181	48.8083	IncI-gamma/K1	MG764547	MOBP	NC_019097	MPF_I	NC_019097_00056	MOBP	JN253636	conjugative	AC027	AL046	Enterobacterales	Enterobacteriaceae	Enterobacterales
AG21-0563	AG21-0563	AC027	3	56181	48.8083	IncI-gamma/K1	MG764547	MOBP	NC_019097	MPF_I	NC_019097_00056	MOBP	JN253636	conjugative	AC027	AL046	Enterobacterales	Enterobacteriaceae	Enterobacterales
AG21-0564	AG21-0564	AA156	1	5174	48.821	rep_cluster_2350	CP041342_00001	MOBP,MOBP	NC_019076_00002,NC_017321_00002	-	-	MOBP	NZ_CP016585	mobilizable	AA156	AH799	Actinobacteria,Bacteroidota,Firmicutes,Proteobacteria	Actinobacteria,Bacteroidota,Firmicutes,Proteobacteria	Escherichia
AG21-0565	AG21-0565	AF598	1	28190	51.685	-	-	-	-	-	-	-	-	non-mobilizable	AF598	-	Salmonella	Salmonella	-
AG21-0565	AG21-0565	AA156	1	5174	49.2849	rep_cluster_2350	CP041342_00001	MOBP,MOBP,MOBP	NC_019076_00002,NC_017321_00002,NC_020251_00005	-	-	MOBP	NZ_CP016585	mobilizable	AA156	AH799	Actinobacteria,Bacteroidota,Firmicutes,Proteobacteria	Actinobacteria,Bacteroidota,Firmicutes,Proteobacteria	Escherichia
AG21-0566	AG21-0566	AA156	1	5174	48.7437	rep_cluster_2350	CP041342_00001	MOBP,MOBP	NC_017321_00002,NC_019076_00002	-	-	MOBP	NZ_CP016585	mobilizable	AA156	AH799	Actinobacteria,Bacteroidota,Firmicutes,Proteobacteria	Actinobacteria,Bacteroidota,Firmicutes,Proteobacteria	Escherichia
AG21-0567	AG21-0567	AA156	1	5174	49.1109	rep_cluster_2350	CP041342_00001	MOBP,MOBP	NC_017321_00002,NC_019076_00002	-	-	MOBP	NZ_CP016585	mobilizable	AA156	AH799	Actinobacteria,Bacteroidota,Firmicutes,Proteobacteria	Actinobacteria,Bacteroidota,Firmicutes,Proteobacteria	Escherichia
AG21-0568	AG21-0568	AA156	1	5174	49.1109	rep_cluster_2350	CP041342_00001	MOBP,MOBP	NC_017321_00002,NC_019076_00002	-	-	MOBP	NZ_CP016585	mobilizable	AA156	AH799	Actinobacteria,Bacteroidota,Firmicutes,Proteobacteria	Actinobacteria,Bacteroidota,Firmicutes,Proteobacteria	Escherichia
AG21-0572	AG21-0572	AA156	1	5174	49.053	rep_cluster_2350	CP041342_00001	MOBP,MOBP	NC_019076_00002,NC_017321_00002	-	-	MOBP	NZ_CP016585	mobilizable	AA156	AH799	Actinobacteria,Bacteroidota,Firmicutes,Proteobacteria	Actinobacteria,Bacteroidota,Firmicutes,Proteobacteria	Escherichia
AG21-0574	AG21-0574	AB038	1	2233	51.6346	rep_cluster_2335	KU302809_00001	-	-	-	-	MOBP	HQ328804	mobilizable	AB038	AJ574	Actinobacteria,Firmicutes,Proteobacteria	Actinobacteria,Firmicutes,Proteobacteria	Enterobacterales
AG21-0575	AG21-0575	AB038	1	2233	51.6346	rep_cluster_2335	KU302809_00001	-	-	-	-	MOBP	HQ328804	mobilizable	AB038	AJ574	Actinobacteria,Firmicutes,Proteobacteria	Actinobacteria,Firmicutes,Proteobacteria	Enterobacterales
AG21-0576	AG21-0576	AB038	1	2386	51.3831	rep_cluster_2335,rep_cluster_2358	KU302809_00001,CP000974_00005	-	-	-	-	MOBP	HQ328804	mobilizable	AB038	AJ574	Proteobacteria	Proteobacteria	-
AG21-0577	AG21-0577	AC027	3	56180	48.8038	IncI-gamma/K1	MG764547	MOBP	NC_019097	MPF_I	NC_019097_00056	MOBP	JN253636	conjugative	AC027	AL046	Enterobacterales	Enterobacteriaceae	Enterobacterales
AG21-0577	AG21-0577	AB038	1	2233	51.6794	rep_cluster_2335	KU302809_00001	-	-	-	-	MOBP	HQ328804	mobilizable	AB038	AJ574	Actinobacteria,Firmicutes,Proteobacteria	Actinobacteria,Firmicutes,Proteobacteria	Enterobacterales
AG21-0578	AG21-0578	AC027	3	56180	48.8038	IncI-gamma/K1	MG764547	MOBP	NC_019097	MPF_I	NC_019097_00056	MOBP	JN253636	conjugative	AC027	AL046	Enterobacterales	Enterobacteriaceae	Enterobacterales
AG21-0578	AG21-0578	AB038	1	1631	53.1576	rep_cluster_2335	KU302809_00001	-	-	-	-	MOBP	HQ328804	mobilizable	AB038	AJ574	Actinobacteria,Firmicutes,Proteobacteria	Actinobacteria,Firmicutes,Proteobacteria	Enterobacterales
AG21-0579	AG21-0579	AC027	3	56180	48.8038	IncI-gamma/K1	MG764547	MOBP	NC_019097	MPF_I	NC_019097_00056	MOBP	JN253636	conjugative	AC027	AL046	Enterobacterales	Enterobacteriaceae	Enterobacterales
AG21-0579	AG21-0579	AB038	1	2233	51.6794	rep_cluster_2335	KU302809_00001	-	-	-	-	MOBP	HQ328804	mobilizable	AB038	AJ574	Actinobacteria,Firmicutes,Proteobacteria	Actinobacteria,Firmicutes,Proteobacteria	Enterobacterales
AG21-0580	AG21-0580	AB038	1	2233	51.6346	rep_cluster_2335	KU302809_00001	-	-	-	-	MOBP	HQ328804	mobilizable	AB038	AJ574	Actinobacteria,Firmicutes,Proteobacteria	Actinobacteria,Firmicutes,Proteobacteria	Enterobacterales
AG21-0581	AG21-0581	AB038	1	2233	51.6346	rep_cluster_2335	KU302809_00001	-	-	-	-	MOBP	HQ328804	mobilizable	AB038	AJ574	Actinobacteria,Firmicutes,Proteobacteria	Actinobacteria,Firmicutes,Proteobacteria	Enterobacterales
AG21-0582	AG21-0582	AB038	1	2233	51.6346	rep_cluster_2335	KU302809_00001	-	-	-	-	MOBP	HQ328804	mobilizable	AB038	AJ574	Actinobacteria,Firmicutes,Proteobacteria	Actinobacteria,Firmicutes,Proteobacteria	Enterobacterales
AG21-0583	AG21-0583	AC357	3	67982	45.6562	IncFIC,IncFII	CP003035,JQ418521	MOBP	JQ418521_00047	MPF_T	NC_019343_00022,NC_019343_00017,NC_019343_00016,NC_019343_00015,NC_019343_00011	-	-	conjugative	AC357	AL523	Salmonella	Salmonella	-
AG21-0584	AG21-0584	AA627	2	96062	52.4172	IncC	000092__CP025470	MOBH,MOBH	NC_012885_00072,NC_012690_00071	MPF_F	NC_012885_00167,NC_009140_00071,NC_014170_00023,NC_012885_00083,NC_016974_00085	MOBH	JQ319772	conjugative	AA627	AI885	Proteobacteria	Gammaproteobacteria	Proteobacteria
AG21-0585	AG21-0585	AC357	3	67982	45.6562	IncFIC,IncFII	CP003035,JQ418521	MOBP	JQ418521_00047	MPF_T	NC_019343_00022,NC_019343_00017,NC_019343_00016,NC_019343_00015,NC_019343_00011	-	-	conjugative	AC357	AL523	Salmonella	Salmonella	-
AG21-0586	AG21-0586	AA627	2	96114	52.4169	IncC	000092__CP025470	MOBH,MOBH	NC_012885_00072,NC_012690_00071	MPF_F	NC_012885_00167,NC_009140_00071,NC_014170_00023,NC_012885_00083,NC_016974_00085	MOBH	JQ319772	conjugative	AA627	AI885	Proteobacteria	Gammaproteobacteria	Proteobacteria
AG21-0587	AG21-0587	AA627	2	96114	52.4169	IncC	000092__CP025470	MOBH,MOBH	NC_012690_00071,NC_012885_00072	MPF_F	NC_012885_00167,NC_016974_00085,NC_012885_00083,NC_014170_00023,NC_009140_00071	MOBH	JQ319772	conjugative	AA627	AI885	Proteobacteria	Gammaproteobacteria	Proteobacteria
AG21-0588	AG21-0588	AC357	3	67982	45.6562	IncFIC,IncFII	CP003035,JQ418521	MOBP	JQ418521_00047	MPF_T	NC_019343_00022,NC_019343_00017,NC_019343_00016,NC_019343_00015,NC_019343_00011	-	-	conjugative	AC357	AL523	Salmonella	Salmonella	-
AG21-0589	AG21-0589	AC120	1	9600	62.1771	IncQ1	000192__AM183225_00009	MOBQ	CP022499	-	-	MOBQ	CP016527	mobilizable	AC120	AL172	Proteobacteria	Proteobacteria	Proteobacteria
AG21-0589	AG21-0589	AA162	1	4720	50.5932	rep_cluster_2350	CP035723_00002	MOBP	NC_014003_00004	-	-	MOBP	NZ_CP011065	mobilizable	AA162	AH810	Actinobacteria,Bacteroidota,Firmicutes,Proteobacteria	Actinobacteria,Bacteroidota,Firmicutes,Proteobacteria	Escherichia
AG21-0590	AG21-0590	AC120	1	9600	62.2292	IncQ1,IncQ1	000191__AB109805_00009,000192__AM183225_00009	MOBQ	CP022499	-	-	MOBQ	CP016527	mobilizable	AC120	AL172	Gammaproteobacteria	Gammaproteobacteria	-
AG21-0590	AG21-0590	AA162	1	4720	50.7627	ColRNAI_rep_cluster_1857,ColRNAI_rep_cluster_1857	GU949535_00001,GQ470395_00001	MOBP	NC_014003_00004	-	-	MOBP	NZ_CP011065	mobilizable	AA162	AH810	Enterobacteriaceae	Enterobacteriaceae	-
AG21-0591	AG21-0591	AC120	1	9600	62.0625	IncQ1	000192__AM183225_00009	MOBQ	CP022499	-	-	MOBQ	CP016527	mobilizable	AC120	AL172	Proteobacteria	Proteobacteria	Proteobacteria
AG21-0591	AG21-0591	AA162	1	4720	50.678	rep_cluster_2350	CP035723_00002	MOBP	NC_014003_00004	-	-	MOBP	NZ_CP011065	mobilizable	AA162	AH810	Actinobacteria,Bacteroidota,Firmicutes,Proteobacteria	Actinobacteria,Bacteroidota,Firmicutes,Proteobacteria	Escherichia
AG21-0001	GRS-S-1	AC027	2	55922	48.8037	IncI-gamma/K1	MG764547	MOBP	NC_019097	MPF_I	NC_019097_00056	MOBP	JN253636	conjugative	AC027	AL046	Enterobacterales	Enterobacteriaceae	Enterobacterales
AG21-0001	GRS-S-1	AB038	1	1788	53.0201	rep_cluster_2335	KU302809_00001	-	-	-	-	MOBP	HQ328804	mobilizable	AB038	AJ574	Actinobacteria,Firmicutes,Proteobacteria	Actinobacteria,Firmicutes,Proteobacteria	Enterobacterales
AG21-0001	GRS-S-1	AE233	1	1186	57.8415	rep_cluster_2335	KU302809_00001	-	-	-	-	MOBP	HQ328804	mobilizable	AE233	-	Actinobacteria,Firmicutes,Proteobacteria	Actinobacteria,Firmicutes,Proteobacteria	Enterobacterales
AG21-0002	GRS-S-2	AC357	2	67984	45.6578	IncFIC,IncFII	CP003035,JQ418521	MOBP	JQ418521_00047	MPF_T	NC_019343_00022,NC_019343_00017,NC_019343_00016,NC_019343_00015,NC_019343_00011	-	-	conjugative	AC357	AL523	Salmonella	Salmonella	-
AG21-0003	GRS-S-3	AC027	2	55922	48.8037	IncI-gamma/K1	MG764547	MOBP	NC_019097	MPF_I	NC_019097_00056	MOBP	JN253636	conjugative	AC027	AL046	Enterobacterales	Enterobacteriaceae	Enterobacterales
AG21-0003	GRS-S-3	AB038	1	1788	53.0201	rep_cluster_2335	KU302809_00001	-	-	-	-	MOBP	HQ328804	mobilizable	AB038	AJ574	Actinobacteria,Firmicutes,Proteobacteria	Actinobacteria,Firmicutes,Proteobacteria	Enterobacterales
AG21-0003	GRS-S-3	AE233	1	1186	57.8415	rep_cluster_2335	KU302809_00001	-	-	-	-	MOBP	HQ328804	mobilizable	AE233	-	Actinobacteria,Firmicutes,Proteobacteria	Actinobacteria,Firmicutes,Proteobacteria	Enterobacterales
AG21-0004	GRS-S-4	AC357	3	67996	45.6512	IncFIC,IncFII	CP003035,JQ418521	MOBP	JQ418521_00047	MPF_T	NC_019343_00022,NC_019343_00017,NC_019343_00016,NC_019343_00015,NC_019343_00011	-	-	conjugative	AC357	AL523	Salmonella	Salmonella	-
AG21-0004	GRS-S-4	AA162	1	4720	50.678	rep_cluster_2350	CP035723_00002	MOBP,MOBP	NC_017321_00002,NC_014003_00004	-	-	MOBP	NZ_CP011065	mobilizable	AA162	AH810	Actinobacteria,Bacteroidota,Firmicutes,Proteobacteria	Actinobacteria,Bacteroidota,Firmicutes,Proteobacteria	Escherichia
AG21-0005	GRS-S-5	AC357	2	67195	45.7355	IncFIC,IncFII	CP003035,JQ418521	MOBP	JQ418521_00047	MPF_T	NC_019343_00011,NC_019343_00015,NC_019343_00016,NC_019343_00017,NC_019343_00022	-	-	conjugative	AC357	AL523	Salmonella	Salmonella	-
AG21-0006	GRS-S-6	AC357	10	64234	46.0488	IncFIC,IncFII	CP003035,JQ418521	MOBP	JQ418521_00047	MPF_T	NC_019343_00011,NC_019343_00022,NC_019343_00016	-	-	conjugative	AC357	AL523	Salmonella	Salmonella	-
AG21-0006	GRS-S-6	AH155	1	2188	38.894	-	-	-	-	-	-	-	-	non-mobilizable	AH155	AR211	Salmonella	Salmonella	-
AG21-0007	GRS-S-7	AC357	3	67926	45.6688	IncFIC,IncFII	CP003035,JQ418521	MOBP	JQ418521_00047	MPF_T	NC_019343_00011,NC_019343_00015,NC_019343_00016,NC_019343_00017,NC_019343_00022	-	-	conjugative	AC357	AL523	Salmonella	Salmonella	-
AG21-0008	GRS-S-8	AC027	2	55922	48.8055	IncI-gamma/K1	MG764547	MOBP	NC_019097	MPF_I	NC_019097_00056	MOBP	JN253636	conjugative	AC027	AL046	Enterobacterales	Enterobacteriaceae	Enterobacterales
AG21-0008	GRS-S-8	AB038	1	2386	51.6345	rep_cluster_2335	KU302809_00001	-	-	-	-	MOBP	HQ328804	mobilizable	AB038	AJ574	Actinobacteria,Firmicutes,Proteobacteria	Actinobacteria,Firmicutes,Proteobacteria	Enterobacterales
AG21-0010	GRS-S-10	AC027	2	55922	48.8037	IncI-gamma/K1	MG764547	MOBP	NC_019097	MPF_I	NC_019097_00056	MOBP	JN253636	conjugative	AC027	AL046	Enterobacterales	Enterobacteriaceae	Enterobacterales
AG21-0010	GRS-S-10	AB038	1	1788	53.0201	rep_cluster_2335	KU302809_00001	-	-	-	-	MOBP	HQ328804	mobilizable	AB038	AJ574	Actinobacteria,Firmicutes,Proteobacteria	Actinobacteria,Firmicutes,Proteobacteria	Enterobacterales
AG21-0010	GRS-S-10	AE233	1	1186	57.8415	rep_cluster_2335	KU302809_00001	-	-	-	-	MOBP	HQ328804	mobilizable	AE233	-	Actinobacteria,Firmicutes,Proteobacteria	Actinobacteria,Firmicutes,Proteobacteria	Enterobacterales
AG21-0012	GRS-S-12	AA627	2	96115	52.4164	IncC	000092__CP025470	MOBH,MOBH	NC_012885_00072,NC_012690_00071	MPF_F	NC_012885_00167,NC_009140_00071,NC_014170_00023,NC_012885_00083,NC_016974_00085	MOBH	JQ319772	conjugative	AA627	AI885	Proteobacteria	Gammaproteobacteria	Proteobacteria
AG21-0014	GRS-S-14	AA627	2	96115	52.4164	IncC	000092__CP025470	MOBH,MOBH	NC_012885_00072,NC_012690_00071	MPF_F	NC_012885_00167,NC_009140_00071,NC_014170_00023,NC_012885_00083,NC_016974_00085	MOBH	JQ319772	conjugative	AA627	AI885	Proteobacteria	Gammaproteobacteria	Proteobacteria
AG21-0015	GRS-S-15	AB445	1	4014	44.6687	rep_cluster_2350	CP041342_00001	-	-	-	-	MOBF,MOBP,MOB_unknown	KT950740,AP017298,NC_019986	mobilizable	AB445	AK230	Actinobacteria,Bacteroidota,Firmicutes,Proteobacteria	Actinobacteria,Bacteroidota,Firmicutes,Proteobacteria	Escherichia
AG21-0016	GRS-S-16	AC027	2	55922	48.793	IncI-gamma/K1	MG764547	MOBP	NC_019097	MPF_I	NC_019097_00056	MOBP	JN253636	conjugative	AC027	AL046	Enterobacterales	Enterobacteriaceae	Enterobacterales
AG21-0016	GRS-S-16	AB445	1	4014	44.8929	rep_cluster_2350	CP041342_00001	-	-	-	-	MOBF,MOBP,MOB_unknown	KT950740,AP017298,NC_019986	mobilizable	AB445	AK230	Actinobacteria,Bacteroidota,Firmicutes,Proteobacteria	Actinobacteria,Bacteroidota,Firmicutes,Proteobacteria	Escherichia
AG21-0017	GRS-S-17	AC027	4	56065	48.8415	IncI-gamma/K1	MG764547	MOBP,MOBP	CP031283_00205,CP023903_00055	MPF_I	NC_019097_00056	MOBP	JN253636	conjugative	AC027	AL046	Enterobacterales	Enterobacteriaceae	Enterobacterales
AG21-0017	GRS-S-17	AB445	1	4014	44.5192	rep_cluster_2350	CP041342_00001	-	-	-	-	MOBF,MOBP,MOB_unknown	KT950740,AP017298,NC_019986	mobilizable	AB445	AK230	Actinobacteria,Bacteroidota,Firmicutes,Proteobacteria	Actinobacteria,Bacteroidota,Firmicutes,Proteobacteria	Escherichia
AG21-0018	GRS-S-18	AC027	3	55939	48.7996	IncI-gamma/K1	MG764547	MOBP	NC_019097	MPF_I	NC_019097_00056	MOBP	JN253636	conjugative	AC027	AL046	Enterobacterales	Enterobacteriaceae	Enterobacterales
AG21-0018	GRS-S-18	AB038	1	1788	53.0201	rep_cluster_2335	KU302809_00001	-	-	-	-	MOBP	HQ328804	mobilizable	AB038	AJ574	Actinobacteria,Firmicutes,Proteobacteria	Actinobacteria,Firmicutes,Proteobacteria	Enterobacterales
AG21-0018	GRS-S-18	AE233	1	1186	57.8415	rep_cluster_2335	KU302809_00001	-	-	-	-	MOBP	HQ328804	mobilizable	AE233	-	Actinobacteria,Firmicutes,Proteobacteria	Actinobacteria,Firmicutes,Proteobacteria	Enterobacterales
AG21-0023	GRS-S-23	AH155	1	2532	43.7599	-	-	-	-	-	-	-	-	non-mobilizable	AH155	AR211	Salmonella	Salmonella	-
AG21-0024	GRS-S-24	AC357	2	66873	45.718	IncFIC,IncFII	CP003035,JQ418521	MOBP	JQ418521_00047	MPF_T	NC_019343_00022,NC_019343_00017,NC_019343_00016,NC_019343_00015,NC_019343_00011	-	-	conjugative	AC357	AL523	Salmonella	Salmonella	-
AG21-0024	GRS-S-24	AH155	1	2231	38.7719	-	-	-	-	-	-	-	-	non-mobilizable	AH155	AR211	Salmonella	Salmonella	-
AG21-0025	GRS-S-25	AC357	1	67313	45.6063	IncFIC,IncFII	CP003035,JQ418521	MOBP	JQ418521_00047	MPF_T	NC_019343_00011,NC_019343_00015,NC_019343_00016,NC_019343_00017,NC_019343_00022	-	-	conjugative	AC357	AL523	Salmonella	Salmonella	-
AG21-0025	GRS-S-25	AH155	1	1983	40.1916	-	-	-	-	-	-	-	-	non-mobilizable	AH155	AR211	Salmonella	Salmonella	-
AG21-0026	GRS-S-26	AC357	1	67244	45.6963	IncFIC,IncFII	CP003035,JQ418521	MOBP	JQ418521_00047	MPF_T	NC_019343_00011,NC_019343_00015,NC_019343_00016,NC_019343_00017,NC_019343_00022	-	-	conjugative	AC357	AL523	Salmonella	Salmonella	-
AG21-0027	GRS-S-27	AC357	1	66964	45.632	IncFIC,IncFII	CP003035,JQ418521	MOBP	JQ418521_00047	MPF_T	NC_019343_00011,NC_019343_00015,NC_019343_00016,NC_019343_00017,NC_019343_00022	-	-	conjugative	AC357	AL523	Salmonella	Salmonella	-
AG21-0028	GRS-S-28	AC357	2	66828	45.6455	IncFIC,IncFII	CP003035,JQ418521	MOBP	JQ418521_00047	MPF_T	NC_019343_00011,NC_019343_00015,NC_019343_00016,NC_019343_00017,NC_019343_00022	-	-	conjugative	AC357	AL523	Salmonella	Salmonella	-
