# Supplementary material for: Genomic Diversity, Antimicrobial Resistance, Plasmidome, and Virulence Profiles of Salmonella Isolated from Small Specialty Crop Farms Revealed by Whole-Genome Sequencing
Source: Antibiotics (Basel). 2023 Nov 18;12(11):1637. doi: 10.3390/antibiotics12111637 (PMC10668983; doi:10.3390/antibiotics12111637)
Supplement: Supplementary file 1 [file antibiotics-12-01637-s001.zip › supplemntary Table S5.virulence genes.xlsx]

## Sheet: Total genes
List of all detected virulence genes
SEQUENCE	START	END	STRAND	GENE	COVERAGE	COVERAGE_MAP	GAPS	%COVERAGE	%IDENTITY	DATABASE	ACCESSION	PRODUCT
NODE_10_length_168631_cov_26.763620	9433	9885	+	fur	1-453/453	===============	0/0	100	99.78	vfdb	NP_459678	(fur) ferric iron uptake transcriptional regulator [Fur (VF0113) - Regulation (VFC0301)] [Salmonella enterica subsp. enterica serovar Typhimurium str. LT2]
NODE_10_length_168631_cov_26.763620	105150	105877	-	entA	16-743/747	===============	0/0	97.46	80.36	vfdb	WP_000348393	(entA) 23-dihydro-23-dihydroxybenzoate dehydrogenase EntA [Enterobactin (VF0228) - Nutritional/Metabolic factor (VFC0272)] [Escherichia coli CFT073]
NODE_10_length_168631_cov_26.763620	105908	106758	-	entB	1-851/858	===============	0/0	99.18	80.38	vfdb	WP_001007140	(entB) isochorismatase [Enterobactin (VF0228) - Nutritional/Metabolic factor (VFC0272)] [Escherichia coli CFT073]
NODE_10_length_168631_cov_26.763620	113337	114245	+	fepG	85-993/993	.==============	0/0	91.54	80.42	vfdb	WP_000640938	(fepG) iron-enterobactin ABC transporter permease [Enterobactin (VF0228) - Nutritional/Metabolic factor (VFC0272)] [Escherichia coli CFT073]
NODE_10_length_168631_cov_26.763620	114242	115029	+	fepC	1-788/816	========/======	2/2	96.45	80.61	vfdb	WP_000140634	(fepC) ferrienterobactin ABC transporter ATPase [Enterobactin (VF0228) - Nutritional/Metabolic factor (VFC0272)] [Escherichia coli CFT073]
NODE_12_length_142809_cov_26.057758	35705	37972	+	slrP	1-2298/2298	========/======	2/30	98.69	95.34	vfdb	NP_459778	(slrP) type III secretion system effector SlrP E3 ubiquitin ligase [TTSS effectors secreted via both systems (VF0948) - Effector delivery system (VFC0086)] [Salmonella enterica subsp. enterica serovar Typhimurium str. LT2]
NODE_13_length_139702_cov_27.970661	47126	49228	-	sspH1	1-2103/2103	===============	0/0	100	99.14	vfdb	AAD40326	(sspH1) type III secretion system effector SspH1 E3 ubiquitin ligase [TTSS effectors secreted via both systems (VF0948) - Effector delivery system (VFC0086)] [Salmonella enterica subsp. enterica serovar Typhimurium str. 14028s]
NODE_14_length_132132_cov_28.509844	15944	17676	+	ibeC	1-1733/1734	===============	0/0	99.94	80.96	vfdb	WP_000556298	(ibeC) phosphoethanolamine transferase CptA [Ibes (VF0237) - Invasion (VFC0083)] [Escherichia coli O45:K1:H7 str. S88]
NODE_15_length_114741_cov_25.245206	61872	63254	+	steC	1-1374/1374	========/======	1/9	100	94	vfdb	NP_460656	(steC) type III secretion system effector SteC [TTSS-2 secreted effectors (VF0947) - Effector delivery system (VFC0086)] [Salmonella enterica subsp. enterica serovar Typhimurium str. LT2]
NODE_16_length_111384_cov_25.257233	100587	101633	-	sseK2	1-1047/1047	===============	0/0	100	97.8	vfdb	NP_461081	(sseK2) type III secretion system effector SseK2 [TTSS-2 secreted effectors (VF0947) - Effector delivery system (VFC0086)] [Salmonella enterica subsp. enterica serovar Typhimurium str. LT2]
NODE_17_length_110609_cov_25.638584	961	2367	+	gndA	1-1407/1407	===============	0/0	100	84.01	vfdb	WP_014907233	(gndA) NADP-dependent phosphogluconate dehydrogenase [Capsule (VF0560) - Immune modulation (VFC0258)] [Klebsiella pneumoniae subsp. pneumoniae NTUH-K2044]
NODE_17_length_110609_cov_25.638584	17848	20197	-	sopA	1-2349/2349	========/======	1/1	100	98.21	vfdb	NP_461011	(sopA) type III secretion system effector SopA E3 ubiquitin ligase [TTSS-1 secreted effectors (VF0949) - Effector delivery system (VFC0086)] [Salmonella enterica subsp. enterica serovar Typhimurium str. LT2]
NODE_17_length_110609_cov_25.638584	107964	108797	-	csgG	1-834/834	===============	0/0	100	99.28	vfdb	NP_460110	(csgG) curli production assembly/transport protein CsgG [Agf (VF0103) - Adherence (VFC0001)] [Salmonella enterica subsp. enterica serovar Typhimurium str. LT2]
NODE_17_length_110609_cov_25.638584	108824	109240	-	csgF	1-417/417	===============	0/0	100	100	vfdb	NP_460111	(csgF) curli production assembly/transport protein CsgF [Agf (VF0103) - Adherence (VFC0001)] [Salmonella enterica subsp. enterica serovar Typhimurium str. LT2]
NODE_17_length_110609_cov_25.638584	109267	109662	-	csgE	1-396/396	===============	0/0	100	100	vfdb	NP_460112	(csgE) curli production assembly/transport protein CsgE [Agf (VF0103) - Adherence (VFC0001)] [Salmonella enterica subsp. enterica serovar Typhimurium str. LT2]
NODE_17_length_110609_cov_25.638584	109667	110317	-	csgD	1-651/651	===============	0/0	100	99.23	vfdb	NP_460113	(csgD) DNA-binding transcriptional regulator CsgD [Agf (VF0103) - Adherence (VFC0001)] [Salmonella enterica subsp. enterica serovar Typhimurium str. LT2]
NODE_19_length_96813_cov_25.818971	53191	54144	-	sseL	1-954/954	===============	0/0	100	95.91	vfdb	NP_461229	(sseL) type III secretion system effector SseL deubiquitinase [TTSS-2 secreted effectors (VF0947) - Effector delivery system (VFC0086)] [Salmonella enterica subsp. enterica serovar Typhimurium str. LT2]
NODE_19_length_96813_cov_25.818971	78295	78945	-	rcsB	1-651/651	===============	0/0	100	85.56	vfdb	WP_002913007	(rcsB) transcriptional regulator RcsB [RcsAB (VF0571) - Regulation (VFC0301)] [Klebsiella pneumoniae subsp. pneumoniae NTUH-K2044]
NODE_20_length_93810_cov_26.261029	6449	7123	+	phoP	1-675/675	===============	0/0	100	99.56	vfdb	NP_460201	(phoP) response regulator in two-component regulatory system with PhoQ [PhoPQ (VF0111) - Regulation (VFC0301)] [Salmonella enterica subsp. enterica serovar Typhimurium str. LT2]
NODE_20_length_93810_cov_26.261029	7123	8586	+	phoQ	1-1464/1464	===============	0/0	100	99.11	vfdb	NP_460200	(phoQ) sensor protein PhoQ [PhoPQ (VF0111) - Regulation (VFC0301)] [Salmonella enterica subsp. enterica serovar Typhimurium str. LT2]
NODE_20_length_93810_cov_26.261029	14958	15968	+	sifA	1-1011/1011	===============	0/0	100	95.85	vfdb	NP_460194	(sifA) type III secretion system effector SifA N-terminal SKIP-binding domain C-terminal guanine nucleotide exchange factor activity [TTSS-2 secreted effectors (VF0947) - Effector delivery system (VFC0086)] [Salmonella enterica subsp. enterica serovar Typhimurium str. LT2]
NODE_20_length_93810_cov_26.261029	92026	92352	-	csgC	1-327/327	===============	0/0	100	100	vfdb	NP_460116	(csgC) curli assembly protein CsgC [Agf (VF0103) - Adherence (VFC0001)] [Salmonella enterica subsp. enterica serovar Typhimurium str. LT2]
NODE_20_length_93810_cov_26.261029	92414	92869	-	csgA	1-456/456	===============	0/0	100	99.56	vfdb	NP_460115	(csgA) curlin major subunit CsgA [Agf (VF0103) - Adherence (VFC0001)] [Salmonella enterica subsp. enterica serovar Typhimurium str. LT2]
NODE_20_length_93810_cov_26.261029	92911	93366	-	csgB	1-456/456	===============	0/0	100	100	vfdb	NP_460114	(csgB) minor curlin subunit precursor curli nucleator protein CsgB [Agf (VF0103) - Adherence (VFC0001)] [Salmonella enterica subsp. enterica serovar Typhimurium str. LT2]
NODE_22_length_80306_cov_25.075431	26266	26898	-	steA	1-633/633	===============	0/0	100	98.1	vfdb	NP_460542	(steA) type III secretion system effector SteA [TTSS-1 secreted effectors (VF0949) - Effector delivery system (VFC0086)] [Salmonella enterica subsp. enterica serovar Typhimurium str. LT2]
NODE_22_length_80306_cov_25.075431	48957	49907	+	sifB	1-951/951	===============	0/0	100	98.11	vfdb	NP_460561	(sifB) type III secretion system effector SifB [TTSS-2 secreted effectors (VF0947) - Effector delivery system (VFC0086)] [Salmonella enterica subsp. enterica serovar Typhimurium str. LT2]
NODE_22_length_80306_cov_25.075431	76398	76799	+	steB	1-402/402	===============	0/0	100	98.26	vfdb	NP_448047	(steB) type III secretion system effector SteB [TTSS-1 secreted effectors (VF0949) - Effector delivery system (VFC0086)] [Salmonella enterica subsp. enterica serovar Typhimurium str. LT2]
NODE_22_length_80306_cov_25.075431	78070	79296	+	sseJ	1-1227/1227	===============	0/0	100	99.43	vfdb	NP_460590	(sseJ) type III secretion system effector SseJ glycerophospholipid:cholesterol acyltransferase [TTSS-2 secreted effectors (VF0947) - Effector delivery system (VFC0086)] [Salmonella enterica subsp. enterica serovar Typhimurium str. LT2]
NODE_25_length_63717_cov_27.470341	40667	41620	-	sopD	1-954/954	===============	0/0	100	98.01	vfdb	NP_461866	(sopD) type III secretion system effector SopD [TTSS-1 secreted effectors (VF0949) - Effector delivery system (VFC0086)] [Salmonella enterica subsp. enterica serovar Typhimurium str. LT2]
NODE_25_length_63717_cov_27.470341	62525	63516	+	rpoS	2-993/993	===============	0/0	99.9	100	vfdb	NP_461845	(rpoS) RNA polymerase sigma factor RpoS [RpoS (VF0112) - Regulation (VFC0301)] [Salmonella enterica subsp. enterica serovar Typhimurium str. LT2]
NODE_29_length_45753_cov_24.318042	38960	39822	+	galF	1-863/891	===============	0/0	96.86	80.19	vfdb	WP_001741945	(galF) GalU regulator GalF [Capsule (VF0560) - Immune modulation (VFC0258)] [Klebsiella pneumoniae subsp. pneumoniae NTUH-K2044]
NODE_35_length_19470_cov_23.414827	3969	4242	-	espO1-1	1-274/279	===============	0/0	98.21	84.67	vfdb	ADD54989	(espO1-1) type III secreted effector [TTSS secreted effectors (VF1111) - Effector delivery system (VFC0086)] [Escherichia coli O55:H7 str. CB9615]
NODE_35_length_19470_cov_23.414827	7714	8436	+	sopE2	1-723/723	===============	0/0	100	96.82	vfdb	NP_460811	(sopE2) type III secretion system effector SopE2 guanine nucleotide exchange factor [TTSS-1 secreted effectors (VF0949) - Effector delivery system (VFC0086)] [Salmonella enterica subsp. enterica serovar Typhimurium str. LT2]
NODE_4_length_312423_cov_26.602569	5208	5804	+	fimW	1-597/597	===============	0/0	100	98.66	vfdb	NP_459547	(fimW) helix-turn-helix transcriptional regulator [Type 1 fimbriae (VF0102) - Adherence (VFC0001)] [Salmonella enterica subsp. enterica serovar Typhimurium str. LT2]
NODE_4_length_312423_cov_26.602569	6295	7017	+	fimY	1-723/723	===============	0/0	100	98.06	vfdb	NP_459545	(fimY) fimbriae Y protein [Type 1 fimbriae (VF0102) - Adherence (VFC0001)] [Salmonella enterica subsp. enterica serovar Typhimurium str. LT2]
NODE_4_length_312423_cov_26.602569	7621	8253	+	fimZ	1-633/633	===============	0/0	100	99.21	vfdb	NP_459544	(fimZ) DNA-binding response regulator [Type 1 fimbriae (VF0102) - Adherence (VFC0001)] [Salmonella enterica subsp. enterica serovar Typhimurium str. LT2]
NODE_4_length_312423_cov_26.602569	8300	8817	-	fimF	1-518/519	===============	0/0	99.81	98.65	vfdb	NP_459543	(fimF) type I fimbriae adaptor protein FimF [Type 1 fimbriae (VF0102) - Adherence (VFC0001)] [Salmonella enterica subsp. enterica serovar Typhimurium str. LT2]
NODE_4_length_312423_cov_26.602569	8827	9834	-	fimH	1-1008/1008	===============	0/0	100	98.71	vfdb	NP_459542	(fimH) type I fimbriae minor fimbrial subunit FimH adhesin [Type 1 fimbriae (VF0102) - Adherence (VFC0001)] [Salmonella enterica subsp. enterica serovar Typhimurium str. LT2]
NODE_4_length_312423_cov_26.602569	9849	12461	-	fimD	1-2613/2613	===============	0/0	100	98.81	vfdb	NP_459541	(fimD) usher protein FimD [Type 1 fimbriae (VF0102) - Adherence (VFC0001)] [Salmonella enterica subsp. enterica serovar Typhimurium str. LT2]
NODE_4_length_312423_cov_26.602569	12492	13184	-	fimC	1-693/693	===============	0/0	100	98.85	vfdb	NP_459540	(fimC) chaperone protein FimC [Type 1 fimbriae (VF0102) - Adherence (VFC0001)] [Salmonella enterica subsp. enterica serovar Typhimurium str. LT2]
NODE_4_length_312423_cov_26.602569	13228	13761	-	fimI	1-534/534	===============	0/0	100	98.5	vfdb	NP_459539	(fimI) fimbrial protein internal segment [Type 1 fimbriae (VF0102) - Adherence (VFC0001)] [Salmonella enterica subsp. enterica serovar Typhimurium str. LT2]
NODE_4_length_312423_cov_26.602569	13836	14393	-	fimA	1-558/558	===============	0/0	100	99.46	vfdb	NP_459538	(fimA) type-1 fimbrial protein subunit A [Type 1 fimbriae (VF0102) - Adherence (VFC0001)] [Salmonella enterica subsp. enterica serovar Typhimurium str. LT2]
NODE_4_length_312423_cov_26.602569	64137	67268	+	acrB	1-3129/3147	========/======	3/5	99.4	83.63	vfdb	WP_002892069	(acrB) acriflavine resistance protein B [AcrAB (VF0568) - Antimicrobial activity/Competitive advantage (VFC0325)] [Klebsiella pneumoniae subsp. pneumoniae NTUH-K2044]
NODE_4_length_312423_cov_26.602569	273606	274052	-	STM0290	1-447/447	===============	0/0	100	99.11	vfdb	NP_459288	(STM0290) hypothetical protein [SCI (Salmonella centrisome island) (VF0974) - Effector delivery system (VFC0086)] [Salmonella enterica subsp. enterica serovar Typhimurium str. LT2]
NODE_4_length_312423_cov_26.602569	274076	276265	-	STM0289	1-2190/2190	===============	0/0	100	98.72	vfdb	NP_459287	(STM0289) type VI secretion protein Vgr [SCI (Salmonella centrisome island) (VF0974) - Effector delivery system (VFC0086)] [Salmonella enterica subsp. enterica serovar Typhimurium str. LT2]
NODE_4_length_312423_cov_26.602569	276662	277183	-	tlde1	1-522/522	===============	0/0	100	99.42	vfdb	NP_459286	(tlde1) putative cytoplasmic protein [SCI (Salmonella centrisome island) (VF0974) - Effector delivery system (VFC0086)] [Salmonella enterica subsp. enterica serovar Typhimurium str. LT2]
NODE_4_length_312423_cov_26.602569	277207	277623	-	STM0287	1-417/417	===============	0/0	100	99.28	vfdb	NP_459285	(STM0287) putative periplasmic protein [SCI (Salmonella centrisome island) (VF0974) - Effector delivery system (VFC0086)] [Salmonella enterica subsp. enterica serovar Typhimurium str. LT2]
NODE_4_length_312423_cov_26.602569	278710	279477	-	STM0286	1-769/789	========/======	1/1	97.34	98.31	vfdb	NP_459284	(STM0286) hypothetical protein [SCI (Salmonella centrisome island) (VF0974) - Effector delivery system (VFC0086)] [Salmonella enterica subsp. enterica serovar Typhimurium str. LT2]
NODE_4_length_312423_cov_26.602569	279477	283346	-	STM0285	1-3870/3870	===============	0/0	100	98.73	vfdb	NP_459283	(STM0285) hypothetical protein [SCI (Salmonella centrisome island) (VF0974) - Effector delivery system (VFC0086)] [Salmonella enterica subsp. enterica serovar Typhimurium str. LT2]
NODE_4_length_312423_cov_26.602569	283380	283811	-	STM0284	1-432/432	===============	0/0	100	99.31	vfdb	NP_459282	(STM0284) putative shiga-like toxin A subunit [SCI (Salmonella centrisome island) (VF0974) - Effector delivery system (VFC0086)] [Salmonella enterica subsp. enterica serovar Typhimurium str. LT2]
NODE_4_length_312423_cov_26.602569	284013	284786	-	STM0283	1-774/774	===============	0/0	100	100	vfdb	NP_459281	(STM0283) hypothetical protein [SCI (Salmonella centrisome island) (VF0974) - Effector delivery system (VFC0086)] [Salmonella enterica subsp. enterica serovar Typhimurium str. LT2]
NODE_4_length_312423_cov_26.602569	284791	286092	-	STM0282	1-1305/1305	========/======	1/3	99.77	99.77	vfdb	NP_459280	(STM0282) hypothetical protein [SCI (Salmonella centrisome island) (VF0974) - Effector delivery system (VFC0086)] [Salmonella enterica subsp. enterica serovar Typhimurium str. LT2]
NODE_4_length_312423_cov_26.602569	286089	287432	-	STM0281	1-1344/1344	===============	0/0	100	100	vfdb	NP_459279	(STM0281) type VI secretion system-associated protein [SCI (Salmonella centrisome island) (VF0974) - Effector delivery system (VFC0086)] [Salmonella enterica subsp. enterica serovar Typhimurium str. LT2]
NODE_4_length_312423_cov_26.602569	287436	287972	-	STM0280	1-537/537	===============	0/0	100	100	vfdb	NP_459278	(STM0280) type VI secretion system-associated lipoprotein [SCI (Salmonella centrisome island) (VF0974) - Effector delivery system (VFC0086)] [Salmonella enterica subsp. enterica serovar Typhimurium str. LT2]
NODE_4_length_312423_cov_26.602569	288039	288524	-	STM0279	1-486/486	===============	0/0	100	100	vfdb	NP_459277	(STM0279) Hcp1 family type VI secretion system effector [SCI (Salmonella centrisome island) (VF0974) - Effector delivery system (VFC0086)] [Salmonella enterica subsp. enterica serovar Typhimurium str. LT2]
NODE_4_length_312423_cov_26.602569	288667	289050	-	STM0278	1-384/384	===============	0/0	100	100	vfdb	NP_459276	(STM0278) putative periplasmic protein [SCI (Salmonella centrisome island) (VF0974) - Effector delivery system (VFC0086)] [Salmonella enterica subsp. enterica serovar Typhimurium str. LT2]
NODE_4_length_312423_cov_26.602569	289035	289520	-	tae4	1-486/486	===============	0/0	100	100	vfdb	NP_459275	(tae4) hypothetical protein [SCI (Salmonella centrisome island) (VF0974) - Effector delivery system (VFC0086)] [Salmonella enterica subsp. enterica serovar Typhimurium str. LT2]
NODE_4_length_312423_cov_26.602569	289825	290310	-	STM0276	1-486/486	===============	0/0	100	100	vfdb	NP_459274	(STM0276) Hcp1 family type VI secretion system effector [SCI (Salmonella centrisome island) (VF0974) - Effector delivery system (VFC0086)] [Salmonella enterica subsp. enterica serovar Typhimurium str. LT2]
NODE_4_length_312423_cov_26.602569	290564	290896	-	STM0275	1-333/333	===============	0/0	100	100	vfdb	NP_459273	(STM0275) putative cytoplasmic protein [SCI (Salmonella centrisome island) (VF0974) - Effector delivery system (VFC0086)] [Salmonella enterica subsp. enterica serovar Typhimurium str. LT2]
NODE_4_length_312423_cov_26.602569	291196	292704	-	STM0274	1-1509/1509	===============	0/0	100	99.54	vfdb	NP_459271	(STM0274) EvpB family type VI secretion protein [SCI (Salmonella centrisome island) (VF0974) - Effector delivery system (VFC0086)] [Salmonella enterica subsp. enterica serovar Typhimurium str. LT2]
NODE_4_length_312423_cov_26.602569	292728	293270	-	STM0273	1-543/543	===============	0/0	100	98.53	vfdb	NP_459270	(STM0273) type VI secretion system-associated protein [SCI (Salmonella centrisome island) (VF0974) - Effector delivery system (VFC0086)] [Salmonella enterica subsp. enterica serovar Typhimurium str. LT2]
NODE_4_length_312423_cov_26.602569	293370	296009	-	STM0272	1-2640/2640	===============	0/0	100	99.32	vfdb	NP_459269	(STM0272) ClpV1 family T6SS ATPase [SCI (Salmonella centrisome island) (VF0974) - Effector delivery system (VFC0086)] [Salmonella enterica subsp. enterica serovar Typhimurium str. LT2]
NODE_4_length_312423_cov_26.602569	296377	297279	+	STM0271	1-903/903	===============	0/0	100	99.34	vfdb	NP_459268	(STM0271) hypothetical protein [SCI (Salmonella centrisome island) (VF0974) - Effector delivery system (VFC0086)] [Salmonella enterica subsp. enterica serovar Typhimurium str. LT2]
NODE_4_length_312423_cov_26.602569	297266	298090	+	STM0270	1-825/825	===============	0/0	100	98.67	vfdb	NP_459267	(STM0270) impE family protein [SCI (Salmonella centrisome island) (VF0974) - Effector delivery system (VFC0086)] [Salmonella enterica subsp. enterica serovar Typhimurium str. LT2]
NODE_4_length_312423_cov_26.602569	298087	298581	+	STM0269	1-495/495	===============	0/0	100	99.19	vfdb	NP_459266	(STM0269) hypothetical protein [SCI (Salmonella centrisome island) (VF0974) - Effector delivery system (VFC0086)] [Salmonella enterica subsp. enterica serovar Typhimurium str. LT2]
NODE_4_length_312423_cov_26.602569	298597	300480	+	STM0268	1-1884/1884	===============	0/0	100	99.42	vfdb	NP_459265	(STM0268) type VI secretion protein [SCI (Salmonella centrisome island) (VF0974) - Effector delivery system (VFC0086)] [Salmonella enterica subsp. enterica serovar Typhimurium str. LT2]
NODE_4_length_312423_cov_26.602569	300477	301472	+	STM0267	1-996/996	===============	0/0	100	99.9	vfdb	NP_459264	(STM0267) sciB domain protein [SCI (Salmonella centrisome island) (VF0974) - Effector delivery system (VFC0086)] [Salmonella enterica subsp. enterica serovar Typhimurium str. LT2]
NODE_4_length_312423_cov_26.602569	301483	302538	+	STM0266	1-1056/1056	===============	0/0	100	99.05	vfdb	NP_459263	(STM0266) hypothetical protein [SCI (Salmonella centrisome island) (VF0974) - Effector delivery system (VFC0086)] [Salmonella enterica subsp. enterica serovar Typhimurium str. LT2]
NODE_5_length_277001_cov_26.342105	162693	169942	-	ratB	65-7308/7308	========/======	30/60	98.75	87.39	vfdb	NP_461449	(ratB) putative outer membrane protein [RatB (VF0399) - Adherence (VFC0001)] [Salmonella enterica subsp. enterica serovar Typhimurium str. LT2]
NODE_5_length_277001_cov_26.342105	177650	179842	-	sinH	1-2193/2193	===============	0/0	100	95.53	vfdb	NP_461452	(sinH) intimin-like protein [SinH (VF0400) - Adherence (VFC0001)] [Salmonella enterica subsp. enterica serovar Typhimurium str. LT2]
NODE_6_length_222901_cov_27.915237	21073	21768	+	mgtC	1-696/696	===============	0/0	100	98.56	vfdb	NP_462663	(mgtC) Mg2+ transport protein [MgtBC (VF0106) - Nutritional/Metabolic factor (VFC0272)] [Salmonella enterica subsp. enterica serovar Typhimurium str. LT2]
NODE_6_length_222901_cov_27.915237	21988	24714	+	mgtB	1-2727/2727	===============	0/0	100	99.16	vfdb	NP_462662	(mgtB) Mg2+ transport protein [MgtBC (VF0106) - Nutritional/Metabolic factor (VFC0272)] [Salmonella enterica subsp. enterica serovar Typhimurium str. LT2]
NODE_6_length_222901_cov_27.915237	28629	31496	-	misL	1-2868/2868	===============	0/0	100	98.92	vfdb	NP_462656	(misL) putative autotransporter [MisL (VF0397) - Adherence (VFC0001)] [Salmonella enterica subsp. enterica serovar Typhimurium str. LT2]
NODE_7_length_176170_cov_25.410763	976	2034	-	ssaU	1-1059/1059	===============	0/0	100	99.15	vfdb	NP_460387	(ssaU) type III secretion system export apparatus switch protein SsaU [TTSS (SPI-2 encode) (VF0321) - Effector delivery system (VFC0086)] [Salmonella enterica subsp. enterica serovar Typhimurium str. LT2]
NODE_7_length_176170_cov_25.410763	2031	2810	-	ssaT	1-780/780	===============	0/0	100	97.05	vfdb	NP_460386	(ssaT) type III secretion system minor export apparatus protein SsaT [TTSS (SPI-2 encode) (VF0321) - Effector delivery system (VFC0086)] [Salmonella enterica subsp. enterica serovar Typhimurium str. LT2]
NODE_7_length_176170_cov_25.410763	2811	3077	-	ssaS	1-267/267	===============	0/0	100	99.62	vfdb	NP_460385	(ssaS) type III secretion system minor export apparatus protein SsaS [TTSS (SPI-2 encode) (VF0321) - Effector delivery system (VFC0086)] [Salmonella enterica subsp. enterica serovar Typhimurium str. LT2]
NODE_7_length_176170_cov_25.410763	3074	3721	-	ssaR	1-648/648	===============	0/0	100	99.23	vfdb	NP_460384	(ssaR) type III secretion system minor export apparatus protein SsaR [TTSS (SPI-2 encode) (VF0321) - Effector delivery system (VFC0086)] [Salmonella enterica subsp. enterica serovar Typhimurium str. LT2]
NODE_7_length_176170_cov_25.410763	3789	4757	-	ssaQ	1-969/969	===============	0/0	100	98.14	vfdb	NP_460383	(ssaQ) type III secretion system C ring protein SsaQ [TTSS (SPI-2 encode) (VF0321) - Effector delivery system (VFC0086)] [Salmonella enterica subsp. enterica serovar Typhimurium str. LT2]
NODE_7_length_176170_cov_25.410763	4738	5112	-	ssaP	1-375/375	===============	0/0	100	99.47	vfdb	NP_460382	(ssaP) type III secretion system needle length regulator SsaP [TTSS (SPI-2 encode) (VF0321) - Effector delivery system (VFC0086)] [Salmonella enterica subsp. enterica serovar Typhimurium str. LT2]
NODE_7_length_176170_cov_25.410763	5093	5470	-	ssaO	1-378/378	===============	0/0	100	99.21	vfdb	NP_460381	(ssaO) type III secretion system stalk protein SsaO [TTSS (SPI-2 encode) (VF0321) - Effector delivery system (VFC0086)] [Salmonella enterica subsp. enterica serovar Typhimurium str. LT2]
NODE_7_length_176170_cov_25.410763	5473	6774	-	ssaN	1-1302/1302	===============	0/0	100	98.69	vfdb	NP_460380	(ssaN) type III secretion system ATPase SsaN [TTSS (SPI-2 encode) (VF0321) - Effector delivery system (VFC0086)] [Salmonella enterica subsp. enterica serovar Typhimurium str. LT2]
NODE_7_length_176170_cov_25.410763	6764	8809	-	ssaV	1-2046/2046	===============	0/0	100	99.66	vfdb	NP_460379	(ssaV) type III secretion system major export apparatus protein ssaV [TTSS (SPI-2 encode) (VF0321) - Effector delivery system (VFC0086)] [Salmonella enterica subsp. enterica serovar Typhimurium str. LT2]
NODE_7_length_176170_cov_25.410763	8794	9162	-	ssaM	1-369/369	===============	0/0	100	97.29	vfdb	NP_460378	(ssaM) type III secretion system protein SsaM [TTSS (SPI-2 encode) (VF0321) - Effector delivery system (VFC0086)] [Salmonella enterica subsp. enterica serovar Typhimurium str. LT2]
NODE_7_length_176170_cov_25.410763	9220	10236	-	ssaL	1-1017/1017	===============	0/0	100	99.11	vfdb	NP_460377	(ssaL) type III secretion system gatekeeper SsaL [TTSS (SPI-2 encode) (VF0321) - Effector delivery system (VFC0086)] [Salmonella enterica subsp. enterica serovar Typhimurium str. LT2]
NODE_7_length_176170_cov_25.410763	10202	10876	-	ssaK	1-675/675	===============	0/0	100	98.67	vfdb	NP_460376	(ssaK) type III secretion system stator SsaK [TTSS (SPI-2 encode) (VF0321) - Effector delivery system (VFC0086)] [Salmonella enterica subsp. enterica serovar Typhimurium str. LT2]
NODE_7_length_176170_cov_25.410763	10873	11421	-	ssaX	1-549/549	===============	0/0	100	99.09	vfdb	NP_460375	(ssaX) type III secretion system base-pod connector [TTSS (SPI-2 encode) (VF0321) - Effector delivery system (VFC0086)] [Salmonella enterica subsp. enterica serovar Typhimurium str. LT2]
NODE_7_length_176170_cov_25.410763	11439	12188	-	ssaJ	1-750/750	===============	0/0	100	98.8	vfdb	NP_460374	(ssaJ) type III secretion system inner MS ring protein SsaJ [TTSS (SPI-2 encode) (VF0321) - Effector delivery system (VFC0086)] [Salmonella enterica subsp. enterica serovar Typhimurium str. LT2]
NODE_7_length_176170_cov_25.410763	12185	12433	-	ssaI	1-249/249	===============	0/0	100	98.39	vfdb	NP_460373	(ssaI) type III secretion system inner rod protein SsaI [TTSS (SPI-2 encode) (VF0321) - Effector delivery system (VFC0086)] [Salmonella enterica subsp. enterica serovar Typhimurium str. LT2]
NODE_7_length_176170_cov_25.410763	12445	12672	-	ssaH	1-228/228	===============	0/0	100	98.25	vfdb	NP_460372	(ssaH) type III secretion system protein SsaH [TTSS (SPI-2 encode) (VF0321) - Effector delivery system (VFC0086)] [Salmonella enterica subsp. enterica serovar Typhimurium str. LT2]
NODE_7_length_176170_cov_25.410763	12713	12928	-	ssaG	1-216/216	===============	0/0	100	98.61	vfdb	NP_460371	(ssaG) type III secretion system needle filament protein SsaG [TTSS (SPI-2 encode) (VF0321) - Effector delivery system (VFC0086)] [Salmonella enterica subsp. enterica serovar Typhimurium str. LT2]
NODE_7_length_176170_cov_25.410763	13022	13711	-	sseG	1-690/690	===============	0/0	100	97.54	vfdb	NP_460370	(sseG) type III secretion system effector SseG [TTSS (SPI-2 encode) (VF0321) - Effector delivery system (VFC0086)] [Salmonella enterica subsp. enterica serovar Typhimurium str. LT2]
NODE_7_length_176170_cov_25.410763	13708	14490	-	sseF	1-783/783	===============	0/0	100	97.19	vfdb	NP_460369	(sseF) type III secretion system effector SseF [TTSS (SPI-2 encode) (VF0321) - Effector delivery system (VFC0086)] [Salmonella enterica subsp. enterica serovar Typhimurium str. LT2]
NODE_7_length_176170_cov_25.410763	14506	14940	-	sscB	1-435/435	===============	0/0	100	97.93	vfdb	NP_460368	(sscB) chaperone for sseF [TTSS (SPI-2 encode) (VF0321) - Effector delivery system (VFC0086)] [Salmonella enterica subsp. enterica serovar Typhimurium str. LT2]
NODE_7_length_176170_cov_25.410763	14992	15408	-	sseE	1-417/417	===============	0/0	100	99.04	vfdb	NP_460367	(sseE) type III secretion system effector SseE [TTSS (SPI-2 encode) (VF0321) - Effector delivery system (VFC0086)] [Salmonella enterica subsp. enterica serovar Typhimurium str. LT2]
NODE_7_length_176170_cov_25.410763	15411	15998	-	sseD	1-588/588	===============	0/0	100	97.11	vfdb	NP_460366	(sseD) type III secretion system hydrophilic translocator pore protein SseD [TTSS (SPI-2 encode) (VF0321) - Effector delivery system (VFC0086)] [Salmonella enterica subsp. enterica serovar Typhimurium str. LT2]
NODE_7_length_176170_cov_25.410763	16014	17468	-	sseC	1-1455/1455	===============	0/0	100	95.05	vfdb	NP_460365	(sseC) type III secretion system hydrophilic translocator pore protein SseC [TTSS (SPI-2 encode) (VF0321) - Effector delivery system (VFC0086)] [Salmonella enterica subsp. enterica serovar Typhimurium str. LT2]
NODE_7_length_176170_cov_25.410763	17471	17944	-	sscA	1-474/474	===============	0/0	100	98.94	vfdb	NP_460364	(sscA) chaperone for sseC [TTSS (SPI-2 encode) (VF0321) - Effector delivery system (VFC0086)] [Salmonella enterica subsp. enterica serovar Typhimurium str. LT2]
NODE_7_length_176170_cov_25.410763	17941	18531	-	sseB	1-591/591	===============	0/0	100	97.29	vfdb	NP_460363	(sseB) type III secretion system effector SseB [TTSS (SPI-2 encode) (VF0321) - Effector delivery system (VFC0086)] [Salmonella enterica subsp. enterica serovar Typhimurium str. LT2]
NODE_7_length_176170_cov_25.410763	18538	18864	-	sseA	1-327/327	===============	0/0	100	99.69	vfdb	NP_460362	(sseA) chaperone for sseB and sseD [TTSS (SPI-2 encode) (VF0321) - Effector delivery system (VFC0086)] [Salmonella enterica subsp. enterica serovar Typhimurium str. LT2]
NODE_7_length_176170_cov_25.410763	19127	19369	-	ssaE	1-243/243	===============	0/0	100	98.77	vfdb	NP_460361	(ssaE) chaperone for sseB [TTSS (SPI-2 encode) (VF0321) - Effector delivery system (VFC0086)] [Salmonella enterica subsp. enterica serovar Typhimurium str. LT2]
NODE_7_length_176170_cov_25.410763	19377	20588	-	ssaD	1-1212/1212	===============	0/0	100	98.43	vfdb	NP_460360	(ssaD) type III secretion system outer MS ring protein SsaD [TTSS (SPI-2 encode) (VF0321) - Effector delivery system (VFC0086)] [Salmonella enterica subsp. enterica serovar Typhimurium str. LT2]
NODE_7_length_176170_cov_25.410763	20569	22062	-	ssaC	1-1494/1494	===============	0/0	100	98.39	vfdb	NP_460359	(ssaC) type III secretion system secretin SsaC [TTSS (SPI-2 encode) (VF0321) - Effector delivery system (VFC0086)] [Salmonella enterica subsp. enterica serovar Typhimurium str. LT2]
NODE_7_length_176170_cov_25.410763	22064	22465	-	spiC/ssaB	1-402/402	===============	0/0	100	99.75	vfdb	NP_460358	(spiC/ssaB) type III secretion system protein SsaB [TTSS (SPI-2 encode) (VF0321) - Effector delivery system (VFC0086)] [Salmonella enterica subsp. enterica serovar Typhimurium str. LT2]
NODE_7_length_176170_cov_25.410763	22866	25628	+	ssrA	1-2763/2763	===============	0/0	100	99.02	vfdb	NP_460357	(ssrA) hybrid sensor histidine kinase/response regulator [TTSS (SPI-2 encode) (VF0321) - Effector delivery system (VFC0086)] [Salmonella enterica subsp. enterica serovar Typhimurium str. LT2]
NODE_7_length_176170_cov_25.410763	25659	26297	+	ssrB	1-639/639	===============	0/0	100	98.59	vfdb	NP_460356	(ssrB) DNA-binding response regulator [TTSS (SPI-2 encode) (VF0321) - Effector delivery system (VFC0086)] [Salmonella enterica subsp. enterica serovar Typhimurium str. LT2]
NODE_8_length_175732_cov_26.644503	20839	21282	-	invH	1-444/444	===============	0/0	100	98.42	vfdb	NP_461821	(invH) type III secretion system pilotin invG [TTSS (SPI-1 encode) (VF0116) - Effector delivery system (VFC0086)] [Salmonella enterica subsp. enterica serovar Typhimurium str. LT2]
NODE_8_length_175732_cov_26.644503	21738	22388	+	invF	1-651/651	===============	0/0	100	99.08	vfdb	NP_461820	(invF) type III secretion system regulatory protein InvF [TTSS (SPI-1 encode) (VF0116) - Effector delivery system (VFC0086)] [Salmonella enterica subsp. enterica serovar Typhimurium str. LT2]
NODE_8_length_175732_cov_26.644503	22385	24073	+	invG	1-1689/1689	===============	0/0	100	98.88	vfdb	NP_461819	(invG) type III secretion system secretin invG [TTSS (SPI-1 encode) (VF0116) - Effector delivery system (VFC0086)] [Salmonella enterica subsp. enterica serovar Typhimurium str. LT2]
NODE_8_length_175732_cov_26.644503	24070	25188	+	invE	1-1119/1119	===============	0/0	100	99.28	vfdb	NP_461818	(invE) type III secretion system gatekeeper invE [TTSS (SPI-1 encode) (VF0116) - Effector delivery system (VFC0086)] [Salmonella enterica subsp. enterica serovar Typhimurium str. LT2]
NODE_8_length_175732_cov_26.644503	25213	27270	+	invA	1-2058/2058	===============	0/0	100	99.22	vfdb	NP_461817	(invA) type III secretion system major export apparatus protein InvA [TTSS (SPI-1 encode) (VF0116) - Effector delivery system (VFC0086)] [Salmonella enterica subsp. enterica serovar Typhimurium str. LT2]
NODE_8_length_175732_cov_26.644503	27294	27701	+	invB	1-408/408	===============	0/0	100	100	vfdb	NP_461816	(invB) type III secretion system protein InvB [TTSS (SPI-1 encode) (VF0116) - Effector delivery system (VFC0086)] [Salmonella enterica subsp. enterica serovar Typhimurium str. LT2]
NODE_8_length_175732_cov_26.644503	27698	28993	+	invC/sctN	1-1296/1296	===============	0/0	100	99.54	vfdb	NP_461815	(invC/sctN) type III secretion system ATPase InvC [TTSS (SPI-1 encode) (VF0116) - Effector delivery system (VFC0086)] [Salmonella enterica subsp. enterica serovar Typhimurium str. LT2]
NODE_8_length_175732_cov_26.644503	28971	29414	+	invI	1-444/444	===============	0/0	100	99.55	vfdb	NP_461814	(invI) type III secretion system stalk protein InvI [TTSS (SPI-1 encode) (VF0116) - Effector delivery system (VFC0086)] [Salmonella enterica subsp. enterica serovar Typhimurium str. LT2]
NODE_8_length_175732_cov_26.644503	29414	30424	+	invJ	1-1011/1011	===============	0/0	100	99.31	vfdb	NP_461813	(invJ) type III secretion system needle length regulator InvJ [TTSS (SPI-1 encode) (VF0116) - Effector delivery system (VFC0086)] [Salmonella enterica subsp. enterica serovar Typhimurium str. LT2]
NODE_8_length_175732_cov_26.644503	30424	31335	+	spaO/sctQ	1-912/912	===============	0/0	100	99.12	vfdb	NP_461812	(spaO/sctQ) type III secretion system C ring protein SpaO [TTSS (SPI-1 encode) (VF0116) - Effector delivery system (VFC0086)] [Salmonella enterica subsp. enterica serovar Typhimurium str. LT2]
NODE_8_length_175732_cov_26.644503	31325	31999	+	spaP	1-675/675	===============	0/0	100	99.11	vfdb	NP_461811	(spaP) type III secretion system minor export apparatus protein SpaP [TTSS (SPI-1 encode) (VF0116) - Effector delivery system (VFC0086)] [Salmonella enterica subsp. enterica serovar Typhimurium str. LT2]
NODE_8_length_175732_cov_26.644503	32025	32285	+	spaQ	1-261/261	===============	0/0	100	100	vfdb	NP_461810	(spaQ) type III secretion system minor export apparatus protein SpaQ [TTSS (SPI-1 encode) (VF0116) - Effector delivery system (VFC0086)] [Salmonella enterica subsp. enterica serovar Typhimurium str. LT2]
NODE_8_length_175732_cov_26.644503	32289	33080	+	spaR	1-792/792	===============	0/0	100	99.5	vfdb	NP_461809	(spaR) type III secretion system minor export apparatus protein SpaR [TTSS (SPI-1 encode) (VF0116) - Effector delivery system (VFC0086)] [Salmonella enterica subsp. enterica serovar Typhimurium str. LT2]
NODE_8_length_175732_cov_26.644503	33067	34137	+	spaS	1-1071/1071	===============	0/0	100	98.79	vfdb	NP_461808	(spaS) type III secretion system export apparatus switch protein SpaS [TTSS (SPI-1 encode) (VF0116) - Effector delivery system (VFC0086)] [Salmonella enterica subsp. enterica serovar Typhimurium str. LT2]
NODE_8_length_175732_cov_26.644503	34275	34772	+	sicA	1-498/498	===============	0/0	100	99.4	vfdb	NP_461807	(sicA) chaparone for SipC and SipB [TTSS (SPI-1 encode) (VF0116) - Effector delivery system (VFC0086)] [Salmonella enterica subsp. enterica serovar Typhimurium str. LT2]
NODE_8_length_175732_cov_26.644503	34775	36556	+	sipB/sspB	1-1782/1782	===============	0/0	100	99.33	vfdb	NP_461806	(sipB/sspB) type III secretion system hydrophilic translocator pore protein SipB [TTSS (SPI-1 encode) (VF0116) - Effector delivery system (VFC0086)] [Salmonella enterica subsp. enterica serovar Typhimurium str. LT2]
NODE_8_length_175732_cov_26.644503	36584	37813	+	sipC/sspC	1-1230/1230	===============	0/0	100	99.51	vfdb	NP_461805	(sipC/sspC) type III secretion system hydrophilic translocator pore protein SipC [TTSS (SPI-1 encode) (VF0116) - Effector delivery system (VFC0086)] [Salmonella enterica subsp. enterica serovar Typhimurium str. LT2]
NODE_8_length_175732_cov_26.644503	37884	38915	+	sipD	1-1032/1032	===============	0/0	100	99.13	vfdb	NP_461804	(sipD) type III secretion system hydrophilic translocator needle tip protein SipD [TTSS (SPI-1 encode) (VF0116) - Effector delivery system (VFC0086)] [Salmonella enterica subsp. enterica serovar Typhimurium str. LT2]
NODE_8_length_175732_cov_26.644503	38934	40991	+	sipA/sspA	1-2058/2058	===============	0/0	100	98.74	vfdb	NP_461803	(sipA/sspA) type III secretion system effector SipA actin polymerizing activity [TTSS-1 secreted effectors (VF0949) - Effector delivery system (VFC0086)] [Salmonella enterica subsp. enterica serovar Typhimurium str. LT2]
NODE_8_length_175732_cov_26.644503	41010	41258	+	iacP	1-249/249	===============	0/0	100	99.2	vfdb	NP_461802	(iacP) putative acyl carrier protein [TTSS (SPI-1 encode) (VF0116) - Effector delivery system (VFC0086)] [Salmonella enterica subsp. enterica serovar Typhimurium str. LT2]
NODE_8_length_175732_cov_26.644503	41589	41981	+	sicP	1-393/393	===============	0/0	100	99.49	vfdb	NP_461800	(sicP) chaparone for SptP [TTSS (SPI-1 encode) (VF0116) - Effector delivery system (VFC0086)] [Salmonella enterica subsp. enterica serovar Typhimurium str. LT2]
NODE_8_length_175732_cov_26.644503	41968	43599	+	sptP	1-1632/1632	===============	0/0	100	99.57	vfdb	NP_461799	(sptP) type III secretion system effector SptP tyrosine phosphatase and GTPase-activating protein [TTSS-1 secreted effectors (VF0949) - Effector delivery system (VFC0086)] [Salmonella enterica subsp. enterica serovar Typhimurium str. LT2]
NODE_8_length_175732_cov_26.644503	43653	44135	-	iagB	1-483/483	===============	0/0	100	99.17	vfdb	NP_461798	(iagB) invasion protein IagB [TTSS (SPI-1 encode) (VF0116) - Effector delivery system (VFC0086)] [Salmonella enterica subsp. enterica serovar Typhimurium str. LT2]
NODE_8_length_175732_cov_26.644503	44153	45814	-	hilA	1-1662/1662	===============	0/0	100	99.52	vfdb	NP_461797	(hilA) transcriptional regulator [TTSS (SPI-1 encode) (VF0116) - Effector delivery system (VFC0086)] [Salmonella enterica subsp. enterica serovar Typhimurium str. LT2]
NODE_8_length_175732_cov_26.644503	46903	47832	-	hilD	1-930/930	===============	0/0	100	99.68	vfdb	NP_461796	(hilD) AraC family transcriptional regulator [TTSS (SPI-1 encode) (VF0116) - Effector delivery system (VFC0086)] [Salmonella enterica subsp. enterica serovar Typhimurium str. LT2]
NODE_8_length_175732_cov_26.644503	48148	49326	+	prgH	1-1179/1179	===============	0/0	100	98.9	vfdb	NP_461795	(prgH) type III secretion system outer MS ring protein PrgH [TTSS (SPI-1 encode) (VF0116) - Effector delivery system (VFC0086)] [Salmonella enterica subsp. enterica serovar Typhimurium str. LT2]
NODE_8_length_175732_cov_26.644503	49351	49593	+	prgI	1-243/243	===============	0/0	100	98.35	vfdb	NP_461794	(prgI) type III secretion system needle filament protein PrgI [TTSS (SPI-1 encode) (VF0116) - Effector delivery system (VFC0086)] [Salmonella enterica subsp. enterica serovar Typhimurium str. LT2]
NODE_8_length_175732_cov_26.644503	49612	49917	+	prgJ	1-306/306	===============	0/0	100	99.67	vfdb	NP_461793	(prgJ) type III secretion system inner rod protein PrgJ [TTSS (SPI-1 encode) (VF0116) - Effector delivery system (VFC0086)] [Salmonella enterica subsp. enterica serovar Typhimurium str. LT2]
NODE_8_length_175732_cov_26.644503	49914	50672	+	prgK	1-759/759	===============	0/0	100	99.61	vfdb	NP_461792	(prgK) type III secretion system inner MS ring protein PrgK [TTSS (SPI-1 encode) (VF0116) - Effector delivery system (VFC0086)] [Salmonella enterica subsp. enterica serovar Typhimurium str. LT2]
NODE_8_length_175732_cov_26.644503	50644	51243	+	orgA/sctK	1-600/600	===============	0/0	100	99	vfdb	NP_461791	(orgA/sctK) type III secretion system accessory cytosolic protein OrgA [TTSS (SPI-1 encode) (VF0116) - Effector delivery system (VFC0086)] [Salmonella enterica subsp. enterica serovar Typhimurium str. LT2]
NODE_8_length_175732_cov_26.644503	51200	51890	+	orgB/SctL	1-681/681	========/======	1/10	100	96.96	vfdb	NP_461790	(orgB/SctL) type III secretion system stator OrgB [TTSS (SPI-1 encode) (VF0116) - Effector delivery system (VFC0086)] [Salmonella enterica subsp. enterica serovar Typhimurium str. LT2]
NODE_8_length_175732_cov_26.644503	51887	52339	+	orgC	1-453/453	===============	0/0	100	98.9	vfdb	NP_461789	(orgC) type III secretion system effector OrgC [TTSS (SPI-1 encode) (VF0116) - Effector delivery system (VFC0086)] [Salmonella enterica subsp. enterica serovar Typhimurium str. LT2]
NODE_8_length_175732_cov_26.644503	52685	53572	+	hilC	1-888/888	===============	0/0	100	99.66	vfdb	NP_461788	(hilC) AraC family transcriptional regulator [TTSS (SPI-1 encode) (VF0116) - Effector delivery system (VFC0086)] [Salmonella enterica subsp. enterica serovar Typhimurium str. LT2]
NODE_8_length_175732_cov_26.644503	53957	54712	+	sprB	1-756/756	===============	0/0	100	98.41	vfdb	NP_461787	(sprB) transcriptional regulator [TTSS (SPI-1 encode) (VF0116) - Effector delivery system (VFC0086)] [Salmonella enterica subsp. enterica serovar Typhimurium str. LT2]
NODE_8_length_175732_cov_26.644503	54871	55779	+	avrA	1-909/909	===============	0/0	100	99.56	vfdb	NP_461786	(avrA) type III secretion system effector AvrA acetyltransferease [TTSS-1 secreted effectors (VF0949) - Effector delivery system (VFC0086)] [Salmonella enterica subsp. enterica serovar Typhimurium str. LT2]
NODE_8_length_175732_cov_26.644503	135072	135968	-	mig-14	1-897/897	===============	0/0	100	97.88	vfdb	NP_461708	(mig-14) antimicrobial peptide resistance protein Mig-14 [Mig-14 (VF0395) - Antimicrobial activity/Competitive advantage (VFC0325)] [Salmonella enterica subsp. enterica serovar Typhimurium str. LT2]
NODE_8_length_175732_cov_26.644503	137710	138762	+	pipB2	1-1053/1053	===============	0/0	100	92.5	vfdb	NP_461706	(pipB2) type III secretion system effector PipB3 [TTSS-2 secreted effectors (VF0947) - Effector delivery system (VFC0086)] [Salmonella enterica subsp. enterica serovar Typhimurium str. LT2]
NODE_9_length_174190_cov_25.712535	26821	27780	+	sopD2	1-960/960	===============	0/0	100	96.35	vfdb	NP_459947	(sopD2) type III secretion system effector SopD2 [TTSS-2 secreted effectors (VF0947) - Effector delivery system (VFC0086)] [Salmonella enterica subsp. enterica serovar Typhimurium str. LT2]
NODE_9_length_174190_cov_25.712535	84110	85162	-	ompA	1-1041/1041	========/======	1/12	100	89.27	vfdb	AAF37887	(ompA) outer membrane protein A [OmpA (VF0236) - Invasion (VFC0083)] [Escherichia coli O18:K1:H7 str. RS218]
NODE_9_length_174190_cov_25.712535	99593	100468	-	pipB	1-876/876	===============	0/0	100	98.97	vfdb	NP_460061	(pipB) type III secretion system effector PipB [TTSS-2 secreted effectors (VF0947) - Effector delivery system (VFC0086)] [Salmonella enterica subsp. enterica serovar Typhimurium str. LT2]
NODE_9_length_174190_cov_25.712535	101803	103488	-	sopB/sigD	1-1686/1686	===============	0/0	100	98.28	vfdb	NP_460064	(sopB/sigD) type III secretion system effector SopB phosphoinositide phosphatase [TTSS-1 secreted effectors (VF0949) - Effector delivery system (VFC0086)] [Salmonella enterica subsp. enterica serovar Typhimurium str. LT2]
NODE_10_length_170904_cov_32.560573	5056	7422	+	sspH2	1-2367/2367	===============	0/0	100	99.75	vfdb	NP_461184	(sspH2) type III secretion system effector SspH2 E3 ubiquitin ligase [TTSS-2 secreted effectors (VF0947) - Effector delivery system (VFC0086)] [Salmonella enterica subsp. enterica serovar Typhimurium str. LT2]
NODE_1_length_614963_cov_33.644260	350089	351989	-	tssM	2-1902/1902	========/======	2/6	99.79	83.25	vfdb		(tssM) Type VI secretion system protein TssM [T6SS (VF0579) - Effector delivery system (VFC0086)] [Shigella sonnei Ss046]
NODE_1_length_614963_cov_33.644260	358543	359283	-	tssL	1-747/762	========/======	1/6	97.24	82.06	vfdb	WP_000343289	(tssL) Type VI secretion system protein TssL [T6SS (VF0579) - Effector delivery system (VFC0086)] [Shigella sonnei Ss046]
NODE_1_length_614963_cov_33.644260	360622	361096	-	tssJ	51-525/525	.==============	0/0	90.48	81.26	vfdb	WP_001080148	(tssJ) Type VI secretion system protein TssJ [T6SS (VF0579) - Effector delivery system (VFC0086)] [Shigella sonnei Ss046]
NODE_1_length_614963_cov_33.644260	368680	369198	+	hcp2/tssD2	1-519/519	===============	0/0	100	85.36	vfdb	WP_001142968	(hcp2/tssD2) Type VI secretion system protein Hcp family [T6SS (VF0579) - Effector delivery system (VFC0086)] [Shigella sonnei Ss046]
NODE_28_length_18882_cov_34.835937	17704	18714	-	sseK1	1-1011/1011	===============	0/0	100	98.81	vfdb	NP_463026	(sseK1) type III secretion system effector SseK1 [TTSS-2 secreted effectors (VF0947) - Effector delivery system (VFC0086)] [Salmonella enterica subsp. enterica serovar Typhimurium str. LT2]
NODE_3_length_473495_cov_34.634390	246356	247717	+	allB	1-1362/1362	========/======	2/2	99.93	82.03	vfdb	WP_012737535	(allB) allantoinase [Allantion utilization (VF0572) - Nutritional/Metabolic factor (VFC0272)] [Klebsiella pneumoniae subsp. pneumoniae NTUH-K2044]
NODE_4_length_402577_cov_34.233490	114442	120495	+	shdA	1-6120/6120	========/======	2/66	98.92	95.13	vfdb	NP_461448	(shdA) AIDA autotransporter-like protein [ShdA (VF0398) - Adherence (VFC0001)] [Salmonella enterica subsp. enterica serovar Typhimurium str. LT2]
NODE_8_length_231497_cov_36.635445	52735	53271	+	lpfA	1-537/537	===============	0/0	100	100	vfdb	NP_462541	(lpfA) long polar fimbria protein LpfA [Lpf (VF0105) - Adherence (VFC0001)] [Salmonella enterica subsp. enterica serovar Typhimurium str. LT2]
NODE_8_length_231497_cov_36.635445	53356	54054	+	lpfB	1-699/699	===============	0/0	100	99.86	vfdb	NP_462540	(lpfB) long polar fimbrial chaperone protein LpfB [Lpf (VF0105) - Adherence (VFC0001)] [Salmonella enterica subsp. enterica serovar Typhimurium str. LT2]
NODE_8_length_231497_cov_36.635445	54077	56605	+	lpfC	1-2529/2529	===============	0/0	100	99.64	vfdb	NP_462539	(lpfC) long polar fimbrial usher protein LpfC [Lpf (VF0105) - Adherence (VFC0001)] [Salmonella enterica subsp. enterica serovar Typhimurium str. LT2]
NODE_8_length_231497_cov_36.635445	56623	57702	+	lpfD	1-1080/1080	===============	0/0	100	99.72	vfdb	NP_462538	(lpfD) long polar fimbrial protein LpfD [Lpf (VF0105) - Adherence (VFC0001)] [Salmonella enterica subsp. enterica serovar Typhimurium str. LT2]
NODE_8_length_231497_cov_36.635445	57708	58235	+	lpfE	1-528/528	===============	0/0	100	99.62	vfdb	NP_462537	(lpfE) long polar fimbrial minor subunit LpfE adhesin [Lpf (VF0105) - Adherence (VFC0001)] [Salmonella enterica subsp. enterica serovar Typhimurium str. LT2]
NODE_4_length_355084_cov_19.188758	83359	84327	-	sseI/srfH	1-969/969	===============	0/0	100	99.69	vfdb	NP_460026	(sseI/srfH) type III secretion system effector SseI/SrfH cysteine protease [TTSS-2 secreted effectors (VF0947) - Effector delivery system (VFC0086)] [Salmonella enterica subsp. enterica serovar Typhimurium str. LT2]
NODE_1_length_953189_cov_13.535518	640484	640897	+	pltB	1-414/414	===============	0/0	100	98.55	vfdb	WP_000281950	(pltB) typhoid-like toxin S-CDT binding subunit PltB [Typhoid toxin (VF0407) - Exotoxin (VFC0235)] [Salmonella enterica subsp. enterica serovar Typhi str. CT18]
NODE_1_length_953189_cov_13.535518	640914	641642	+	pltA	1-729/729	===============	0/0	100	99.45	vfdb	WP_001766395	(pltA) typhoid-like toxin S-CDT ADP-ribosylating subunit PltA [Typhoid toxin (VF0407) - Exotoxin (VFC0235)] [Salmonella enterica subsp. enterica serovar Typhi str. CT18]
NODE_1_length_953189_cov_13.535518	642974	643783	-	cdtB	1-810/810	===============	0/0	100	99.26	vfdb	WP_001529135	(cdtB) cytolethal distending toxin B [Typhoid toxin (VF0407) - Exotoxin (VFC0235)] [Salmonella enterica subsp. enterica serovar Typhi str. CT18]
NODE_1_length_1103163_cov_11.106256	1087736	1088269	+	sodCI	1-534/534	===============	0/0	100	100	vfdb	NP_460019	(sodCI) Gifsy-2 prophage: superoxide dismutase precursor (Cu-Zn) [SodCI (VF0109) - Stress survival (VFC0282)] [Salmonella enterica subsp. enterica serovar Typhimurium str. LT2]
NODE_6_length_375365_cov_11.492613	373717	375210	+	gogB	1-1494/1494	===============	0/0	100	100	vfdb	NP_461519	(gogB) type III secretion system effector GogB anti-inflammatory effector [TTSS-2 secreted effectors (VF0947) - Effector delivery system (VFC0086)] [Salmonella enterica subsp. enterica serovar Typhimurium str. LT2]
NODE_1_length_1736887_cov_24.033596	5474	6397	-	tcpC	1-924/924	===============	0/0	100	97.51	vfdb	WP_000562556	(tcpC) Tir domain containing protein TcpC [TcpC (VF0413) - Immune modulation (VFC0258)] [Escherichia coli CFT073]
NODE_14_length_74689_cov_11.318661	29521	30261	+	mig-5	1-741/741	===============	0/0	100	100	vfdb	NP_490536	(mig-5) putative carbonic anhydrase [Mig-5 (VF0396) - Antimicrobial activity/Competitive advantage (VFC0325)] [Salmonella enterica subsp. enterica serovar Typhimurium str. LT2]
NODE_14_length_74689_cov_11.318661	37821	39602	+	spvB	1-1776/1776	========/======	1/6	100	99.61	vfdb	NP_490529	(spvB) type III secretion system effector SpvB ADP-ribosylation activity [SpvB (VF0107) - Exotoxin (VFC0235)] [Salmonella enterica subsp. enterica serovar Typhimurium str. LT2]
NODE_14_length_74689_cov_11.318661	39883	40608	+	spvC	1-726/726	===============	0/0	100	99.86	vfdb	NP_490528	(spvC) type III secretion system effector SpvC phosphothreonine lyase [TTSS-2 secreted effectors (VF0947) - Effector delivery system (VFC0086)] [Salmonella enterica subsp. enterica serovar Typhimurium str. LT2]
NODE_14_length_74689_cov_11.318661	40869	41519	+	spvD	1-651/651	===============	0/0	100	100	vfdb	NP_490527	(spvD) Salmonella plasmid virulence: hydrophilic protein [TTSS-2 secreted effectors (VF0947) - Effector delivery system (VFC0086)] [Salmonella enterica subsp. enterica serovar Typhimurium str. LT2]
NODE_3_length_495365_cov_20.573435	132845	134176	+	tssK	1-1330/1330	========/======	3/4	99.92	80.05	vfdb		(tssK) Type VI secretion system protein TssK [T6SS (VF0579) - Effector delivery system (VFC0086)] [Shigella sonnei Ss046]
NODE_15_length_49762_cov_11.091327	43186	43488	+	pefB	1-303/303	===============	0/0	100	97.69	vfdb	NP_490511	(pefB) plasmid-encoded fimbriae regulatory protein PefB [Pef (VF0104) - Adherence (VFC0001)] [Salmonella enterica subsp. enterica serovar Typhimurium str. LT2]
NODE_15_length_49762_cov_11.091327	43763	44287	+	pefA	1-519/519	========/======	2/6	100	80.95	vfdb	NP_490510	(pefA) plasmid-encoded fimbriae major subunit PefA [Pef (VF0104) - Adherence (VFC0001)] [Salmonella enterica subsp. enterica serovar Typhimurium str. LT2]
NODE_15_length_49762_cov_11.091327	44514	46922	+	pefC	1-2409/2409	===============	0/0	100	96.51	vfdb	NP_490509	(pefC) plasmid-encoded fimbriae usher protein PefC [Pef (VF0104) - Adherence (VFC0001)] [Salmonella enterica subsp. enterica serovar Typhimurium str. LT2]
NODE_15_length_49762_cov_11.091327	46915	47607	+	pefD	1-693/693	===============	0/0	100	98.99	vfdb	NP_490508	(pefD) plasmid-encoded fimbriae chaperone protein PefD [Pef (VF0104) - Adherence (VFC0001)] [Salmonella enterica subsp. enterica serovar Typhimurium str. LT2]
NODE_23_length_1783_cov_11.725131	1123	1680	-	rck	1-558/558	===============	0/0	100	97.49	vfdb	NP_490501	(rck) resistance to complement killing [Rck (VF0108) - Immune modulation (VFC0258)] [Salmonella enterica subsp. enterica serovar Typhimurium str. LT2]

## Sheet: unique genes
List of all detected virulence genes
Function	Genes	Serotypes
Toxin related genes	cdtB	Give, Montevideo, Oranienburg
	spvB	Enteritidis, Dublin
	spvC	Enteritidis, Dublin
	spvD	Enteritidis, Dublin
	pltA(exotoxin)	Give, Montevideo, Oranienburg
	pltB(exotoxin)	Give, Montevideo, Oranienburg
plasmid-encoded fimbriae gene	pefA	Enteritidis
	pefB	Enteritidis
	pefC	Enteritidis
	pefD	Enteritidis
long-polar fimbrae genes	lpfA	Brenderup, Dublin, Enteritidis, Muenchen, Newport
	lpfB	Brenderup, Dublin, Enteritidis, Muenchen, Newport
	lpfC	Brenderup, Dublin, Enteritidis, Muenchen, Newport
	lpfD	Brenderup, Dublin, Enteritidis, Muenchen, Newport
	lpfE	Brenderup, Dublin, Enteritidis, Muenchen, Newport
Immune modulation	Rck	Enteritidis
	tcpc	Anatum, Oranienburg
Anti-inflammatory effectors	GogB	Newport
Adherence	shda	Anatum, Brenderup, Litchfield,Newport,
	ratB	Brenderup, Cerro, Dublin, Enteritidis, Give, Litchfield, Montevideo, Muenchen, Newport, Oranienburg, Paratyphi
Survival of bacteria	sseK1	Cerro, Dublin, Enteritidis, Montevideo, Oranienburg, Paratyphi
	sodCl	Dublin, Enteritidis, Newport
Iron ABC transporter	fepC	Anatum, Brenderup, Cerro, Dublin, Give, Litchfield, Montevideo, Muenchen, Newport, Oranienburg, Paratyphi
Iron acquisition	entA	Anatum, Cerro, Dublin, Enteritidis, Give, Litchfield, Montevideo, Muenchen, Newport, Oranienburg
Effector	sseI/srfH	Dublin, Enteritidis, Newport
	ssph1	Cerro
	ssph2	Anatum, Brenderup, Cerro, Enteritidis, Litchfield, Muenchen, Newport, Paratyphi
	ssek2	Anatum, Brenderup, Cerro, Litchfield, Muenchen, Newport
	avra	Anatum, Brenderup, Cerro, Dublin, Enteritidis, Give, Litchfield, Muenchen, Newport, Paratyphi
	slrP	Anatum, Brenderup, Cerro, Dublin, Enteritidis, Give, Litchfield, Montevideo, Muenchen, Newport, Oranienburg, Paratyphi
	pipb2	Anatum, Brenderup, Cerro, Dublin, Enteritidis, Give, Litchfield, Muenchen, Newport,
	sseJ	Anatum, Brenderup, Cerro, Dublin, Enteritidis, Give, Litchfield, Montevideo, Muenchen, Newport, Oranienburg, Paratyphi
	hcp2/tssD2	Dublin
	steB	Anatum, Cerro, Dublin, Enteritidis, Give, Litchfield, Montevideo, Muenchen, Newport, Oranienburg, Paratyphi
	allB	Anatum , Brenderup, Dublin, Enteritidis, Litchfield, Montevideo, Muenchen, Newport, Oranienburg, Paratyphi
Antimicrobial activity/Competitive advantage	mig-5	Dublin, Enteritidis
Effector delivery system	STM0267	Anatum, Brenderup, Cerro, Dublin, Give, Litchfield, Montevideo, Muenchen, Newport, Oranienburg, Paratyphi
	STM0268	Anatum, Brenderup, Cerro, Dublin, Give, Litchfield, Montevideo, Muenchen, Newport, Oranienburg, Paratyphi
	STM0269	Anatum, Brenderup, Cerro, Dublin, Give, Litchfield, Montevideo, Muenchen, Newport, Oranienburg, Paratyphi
	STM0270	Anatum, Brenderup, Cerro, Dublin, Give, Litchfield, Montevideo, Muenchen, Newport, Oranienburg, Paratyphi
	STM0271	Anatum, Brenderup, Cerro, Dublin, Give, Litchfield, Montevideo, Muenchen, Newport, Oranienburg, Paratyphi
	STM0272	Anatum, Brenderup, Cerro, Dublin, Give, Litchfield, Montevideo, Muenchen, Newport, Oranienburg, Paratyphi
	STM0273	Anatum, Brenderup, Cerro, Dublin, Give, Litchfield, Montevideo, Muenchen, Newport, Oranienburg, Paratyphi
	STM0274	Anatum, Brenderup, Cerro, Dublin, Give, Litchfield, Montevideo, Muenchen, Newport, Oranienburg, Paratyphi
	STM0275	Anatum, Brenderup, Cerro, Give, Litchfield, Montevideo, Muenchen, Newport, Oranienburg, Paratyphi
	STM0276	Anatum, Brenderup, Cerro, Dublin, Give, Litchfield, Montevideo, Muenchen, Newport, Oranienburg, Paratyphi
	STM0278	Anatum, Brenderup, Cerro, Give, Litchfield, Montevideo, Muenchen, Newport, Oranienburg, Paratyphi
	STM0279	Anatum, Brenderup, Cerro, Give, Litchfield, Montevideo, Muenchen, Newport, Oranienburg, Paratyphi
	STM0280	Anatum, Brenderup, Cerro, Dublin, Give, Litchfield, Montevideo, Muenchen, Newport, Oranienburg, Paratyphi
	STM0281	Anatum, Brenderup, Cerro, Dublin, Give, Litchfield, Montevideo, Muenchen, Newport, Oranienburg, Paratyphi
	STM0282	Anatum, Brenderup, Cerro, Dublin, Give, Litchfield, Montevideo, Muenchen, Newport, Oranienburg, Paratyphi
	STM0283	Anatum, Brenderup, Cerro, Dublin, Give, Litchfield, Montevideo, Muenchen, Newport, Oranienburg, Paratyphi
	STM0284	Anatum, Brenderup, Cerro, Dublin, Give, Litchfield, Montevideo, Muenchen, Newport, Oranienburg, Paratyphi
	STM0285	Anatum, Brenderup, Cerro, Give, Litchfield, Montevideo, Muenchen, Newport, Oranienburg, Paratyphi
	STM0286	Anatum, Brenderup, Cerro, Dublin, Give, Litchfield, Montevideo, Muenchen, Newport, Oranienburg, Paratyphi
	STM0287	Anatum, Brenderup, Cerro, Dublin, Litchfield, Muenchen, Newport, Oranienburg, Paratyphi
	STM0290	Anatum, Brenderup, Cerro, Dublin, Give, Montevideo, Muenchen, Newport, Paratyphi
	tae4	Anatum, Brenderup, Cerro, Give, Litchfield, Montevideo, Muenchen, Newport, Oranienburg, Paratyphi
	tlde1	Anatum, Brenderup, Cerro, Dublin, Enteritidis, Litchfield, Muenchen, Newport, Oranienburg, Paratyphi
	tssJ	Dublin
	tssK	Dublin
	tssL	Dublin
	tssM	Dublin
